# Supplementary material for: External oxidant-free and selective thiofunctionalization of alkenes enabled by photoredox-neutral catalysis
Source: Royal Society of Chemistry journal article supplement (doi:10.1039/d2qo00957a), 2022-01-01

## *Electronic Supplementary Information*

### **External Oxidant-Free and Selective Thiofunctionalization of Alkenes Enabled by Photoredox-Neutral Catalysis**

Rong-Bin Liang,<sup>a</sup> Can-Ming Zhu,<sup>a</sup> Pei-Qi Song,<sup>a</sup> Lei-Min Zhao,<sup>b</sup> Qing-Xiao Tong<sup>a</sup> and Jian-Ji  
Zhong<sup>\*a</sup>

<sup>a</sup>Department of Chemistry and Key Laboratory for Preparation and Application of Ordered Structural Materials of Guangdong Province, Shantou University, and Chemistry and Chemical Engineering Guangdong Laboratory, Guangdong 515063, P. R. China.

<sup>b</sup>Department of Chemistry, Southern University of Science and Technology (SUSTech), Xueyuan Blvd 1088, Shenzhen, 518055, P. R. China

\*E-mail: [jjzhong@stu.edu.cn](mailto:jjzhong@stu.edu.cn)

# Table of Contents

|                                                                     |           |
|---------------------------------------------------------------------|-----------|
| <b>1. Experimental section .....</b>                                | <b>3</b>  |
| <b>1) General information .....</b>                                 | <b>3</b>  |
| <b>2) Preparation of alkenes.....</b>                               | <b>4</b>  |
| <b>3) Preparation of <i>N</i>-phenyl-sulfenyl phthalimides.....</b> | <b>5</b>  |
| <b>4) Preparation of vinyl estrone .....</b>                        | <b>6</b>  |
| <b>5) General procedure for the photochemical reactions .....</b>   | <b>7</b>  |
| <b>6) Luminescence quenching experiments .....</b>                  | <b>8</b>  |
| <b>7) Radical inhibition experiment .....</b>                       | <b>9</b>  |
| <b>8) Isotope labelling experiment.....</b>                         | <b>10</b> |
| <b>9) References.....</b>                                           | <b>11</b> |
| <b>2. Characterization data of the products .....</b>               | <b>12</b> |
| <b>3. NMR spectra for the products.....</b>                         | <b>30</b> |

## 1. Experimental section

### 1) General information

All chemicals, unless otherwise noted, were purchased from commercial sources and were used without further purification. Unless stated otherwise, all reactions were carried out under argon atmosphere. The substrates alkenes (**a**) and *N*-phenyl-sulfonyl phthalimides (**b**) were synthesized according to the literature methods with slight modification.<sup>[1-5]</sup> Irradiation with visible light was performed using blue LEDs ( $\lambda = 450 \pm 10$  nm) illumination instruments (The instruments were designed by ourselves and the actual output power density of the LEDs at 0.5 cm distance is 33.70 mW/cm<sup>2</sup> detected by CEL-NP2000-10 (Beijing Ceau Light Co. Ltd., China) light power meter). For irradiation, the material of the reaction vessel is common glass; the distance from the light source is about 0.5 cm.

The nuclear magnetic resonance spectra were recorded on the Bruker Ascend<sup>TM</sup> 400 MHz NMR spectrometer with tetramethylsilane (TMS) as an internal standard. High resolution mass spectra were recorded using a Q Exactive mass spectrometer (Thermo Fisher Scientific, USA). Cyclic voltammogram experiments were measured on the CHI-Instrument CHI660E.

## 2) Preparation of alkenes<sup>[1-2]</sup>

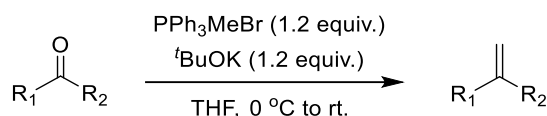

A solution of methyl triphenylphosphonium bromide (4.28 g, 12.0 mmol) in anhydrous THF (15.0 mL) was cooled to 0 °C, followed by addition of <sup>t</sup>BuOK (1.35 g, 12.0 mmol). The reaction mixture was stirred at 0 °C for 1 h, and then the ketones (10.0 mmol, 1.0 equiv.) was added. The resulting mixture was warmed gradually to r.t. and kept stirring for 12 h. The resultant reaction solution was filtered over Celite, and the filtrate was concentrated under reduced pressure to yield a residue which was further purified over silica gel flash column chromatography to afford the product.

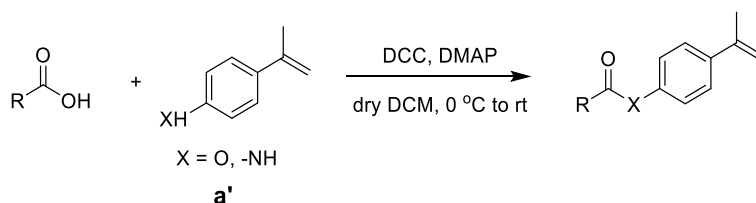

To a solution of carboxylic acid (1.0 equiv., 5.0 mmol), 4-dimethylaminopyridine (DMAP) (20%, 1.0 mmol, 122 mg) and **a'** (1.1 equiv., 5.5 mmol) in dry DCM (15 mL), followed by adding *N,N'*-dicyclohexylcarbodiimide (DCC) (1.1 equiv., 5.5 mmol, 1.14 g). The reaction mixture was stirred at room temperature for 12h. Upon completion, the resulting mixture was filtered through a pad of Celite. The filtrate was concentrated under reduced pressure. The resulting residue was purified by silica gel column chromatography to afford the desired products.

### 3) Preparation of *N*-phenyl-sulfenyl phthalimides<sup>[3-4]</sup>

#### Method A:

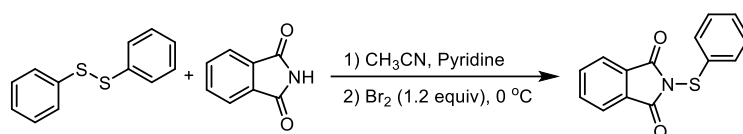

A suspension of phthalimide (1.047 g, 10.0 mmol) and diphenyl disulfide (1.30 g, 6.0 mmol) in CH<sub>3</sub>CN (5.0 mL) and pyridine (4.0 mL) were treated with a solution of Br<sub>2</sub> (615 μL in 5.0 mL CH<sub>3</sub>CN, 12.0 mmol, 1.2 equiv) dropwise over 30 mins. Upon complete addition of Br<sub>2</sub> solution, the mixture was stirred for 1 h at 0 °C, and was subsequently quenched by dropwise addition of CH<sub>3</sub>OH (15.0 mL). Filtration of the suspension and washing of the precipitate with pre-cooled CH<sub>3</sub>OH (0 °C, 3 × 10.0 mL). Further purification was achieved by recrystallization from a hexane/CH<sub>2</sub>Cl<sub>2</sub> mixture.

#### Method B:

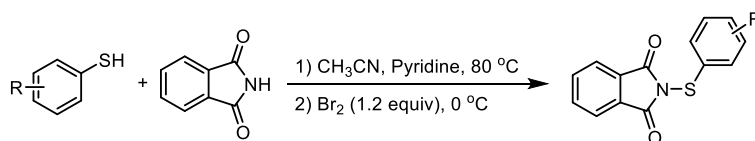

A suspension of phthalimide (1.047 g, 10.0 mmol) and thiophenols (11.0 mmol, 1.1 equiv) in CH<sub>3</sub>CN (5.0 mL) and pyridine (4.0 mL) was heated to 80 °C and then cooled to room temperature. The mixture was treated with a solution of Br<sub>2</sub> (615 μL in 5.0 mL CH<sub>3</sub>CN, 12.0 mmol, 1.2 equiv) dropwise over 30 mins. Upon complete addition of Br<sub>2</sub> solution, the mixture was stirred for 1 h at 0 °C and was subsequently quenched by dropwise addition of H<sub>2</sub>O (15.0 mL). Filtration of the suspension and washing of the precipitate with pre-cooled CH<sub>3</sub>OH (0 °C, 3 × 10.0 mL). Further purification was achieved by recrystallization from a hexane/CH<sub>2</sub>Cl<sub>2</sub> mixture.

#### 4) Preparation of vinyl estrone<sup>[5]</sup>

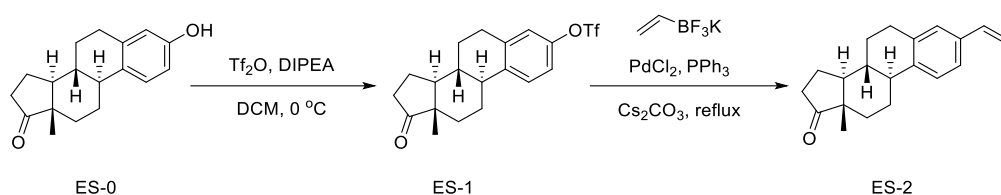

Estrone (10.0 mmol, 1.0 equiv., 2.70 g), and DIPEA (12.0 mmol, 1.2 equiv.) were dissolved in DCM (30.0 mL) in a two-neck flask with a stir bar under argon atmosphere. The reaction mixture was stirred at 0 °C, and Tf<sub>2</sub>O (12.0 mmol, 1.2 equiv., 2.0 mL) was dropwise added into reaction system over 5 min. The reaction mixture was then allowed to warm to room temperature and stirred for 30 min. Upon completion, water (50.0 mL) was added to quench the reaction. The reaction mixture was then extracted with DCM (30.0 mL x 3). The combined organic extracts were dried with anhydrous MgSO<sub>4</sub> and concentrated under vacuum. The crude product was purified by flash column chromatography on silica gel to afford the corresponding product **ES-1** as white solid in 81% yield.

An oven dried 2-neck round bottom flask was charged with triflate (2.01 g, 5 mmol, 1 equiv.), potassium vinyltrifluoroborate (675 mg, 5 mmol, 1 equiv.), PdCl<sub>2</sub> (17.7 mg, 0.1 mmol, 0.02 equiv.), PPh<sub>3</sub> (78.7 mg, 0.3 mmol, 0.06 equiv.), Cs<sub>2</sub>CO<sub>3</sub> (4.89 g, 15 mmol, 3 equiv.), THF (9 mL), H<sub>2</sub>O (1 mL) and stirred under reflux until completion. Reaction mixture was then diluted with 50 mL H<sub>2</sub>O and extracted 3 times with 25 mL DCM. Combined organic phases were dried over magnesium sulfate, filtered through short pad of Celite and concentrated under reduced pressure. Purification by column chromatography (Hexane : EtOAc = 5:1) afforded corresponding product **ES-2** as white solid in 63% yield.

## 5) General procedure for the photochemical reactions

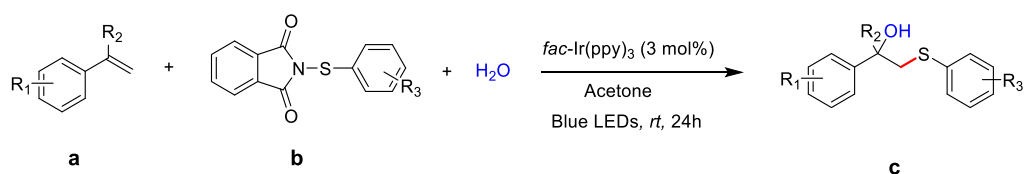

**a** (1.0 equiv., 0.2 mmol), **b** (1.1 equiv., 0.22 mmol), *fac*-Ir(ppy)<sub>3</sub> (4.0 mg, 3.0 mol%) were dissolved in 4.0 mL co-solvent (acetone: H<sub>2</sub>O = 20:1 (v/v)) in a 10.0 mL flask equipped with magnetic stirring bar, then the reaction tube was irradiated by blue LEDs ( $\lambda = 450 \pm 10$  nm) at room temperature for 24 h. After reaction, the solvent was removed by rotary evaporation and purified by column-chromatography on silica gel using hexane/ ethyl acetate as the eluent to afford the desired product **c**.

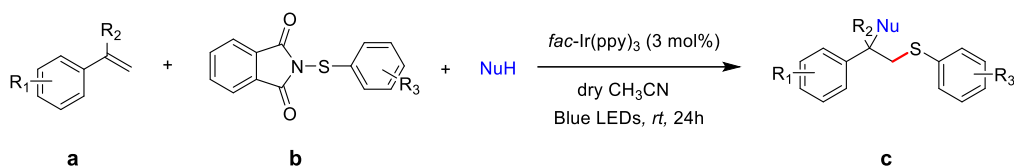

**a** (1.0 equiv., 0.2 mmol), **b** (1.1 equiv., 0.22 mmol), NuH (ROH: 8.0-15.0 equiv.; R<sub>2</sub>NH: 2.0 equiv.), *fac*-Ir(ppy)<sub>3</sub> (4.0 mg, 3.0 mol%) were dissolved in 4.0 mL dry CH<sub>3</sub>CN in a 10.0 mL flask equipped with magnetic stirring bar, then the reaction tube was irradiated by blue LEDs ( $\lambda = 450 \pm 10$  nm) at room temperature for 24 h. After reaction, the solvent was removed by rotary evaporation and purified by column-chromatography on silica gel using hexane/ ethyl acetate as the eluent to afford the desired product **c**.

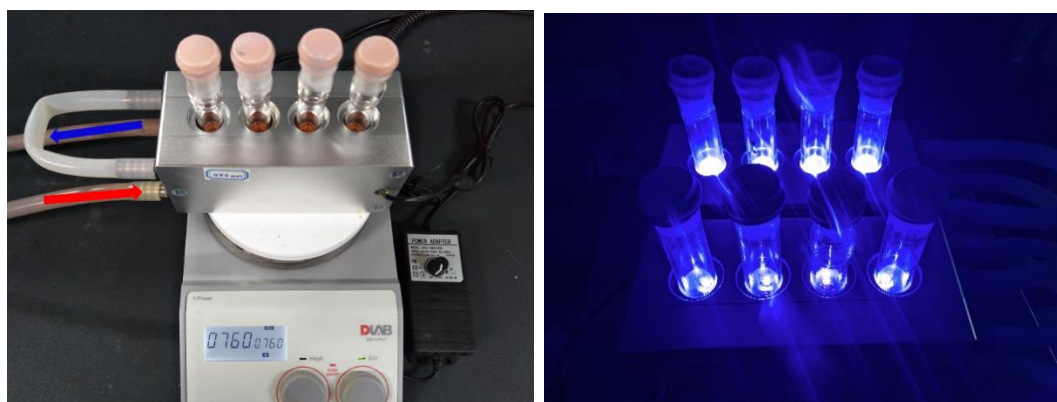

450 nm photoreactor

## 6) Luminescence Quenching Experiments

**General procedure:** The luminescence quenching experiments were measured with excitation at 449 nm. A co-solvent (acetone: H<sub>2</sub>O = 20:1 (v/v)) solution of  $1 \times 10^{-4}$  M *fac*-Ir(ppy)<sub>3</sub> and  $3.0 \times 10^{-1}$  M **b1** respectively were prepared. The experiments were conducted in 1.25 cm x 1.25 cm x 4.5 cm quartz cuvette at room temperature. Appropriate volume (the whole solution volume change < 5%) of the quencher **b1** was respectively injected to the co-solvent (acetone: H<sub>2</sub>O = 20:1 (v/v)) solution (3.0 mL) of  $1 \times 10^{-4}$  M *fac*-Ir(ppy)<sub>3</sub> in the quartz cuvette by microsyringe.

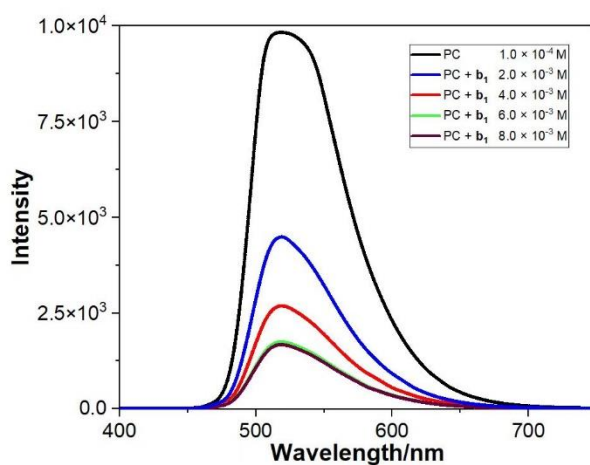

**Figure S1.** Luminescence quenching spectra of *fac*-Ir(ppy)<sub>3</sub> ( $1.0 \times 10^{-4}$  M) by various concentration of **b1**



## 7) Radical inhibition experiment

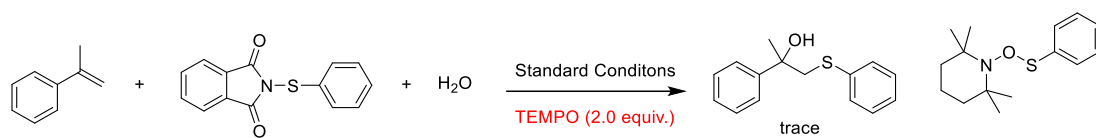

detected by HRMS  
HRMS (ES<sup>+</sup>) Calcd [M+H]<sup>+</sup> : 266.1573  
Found : 266.1568

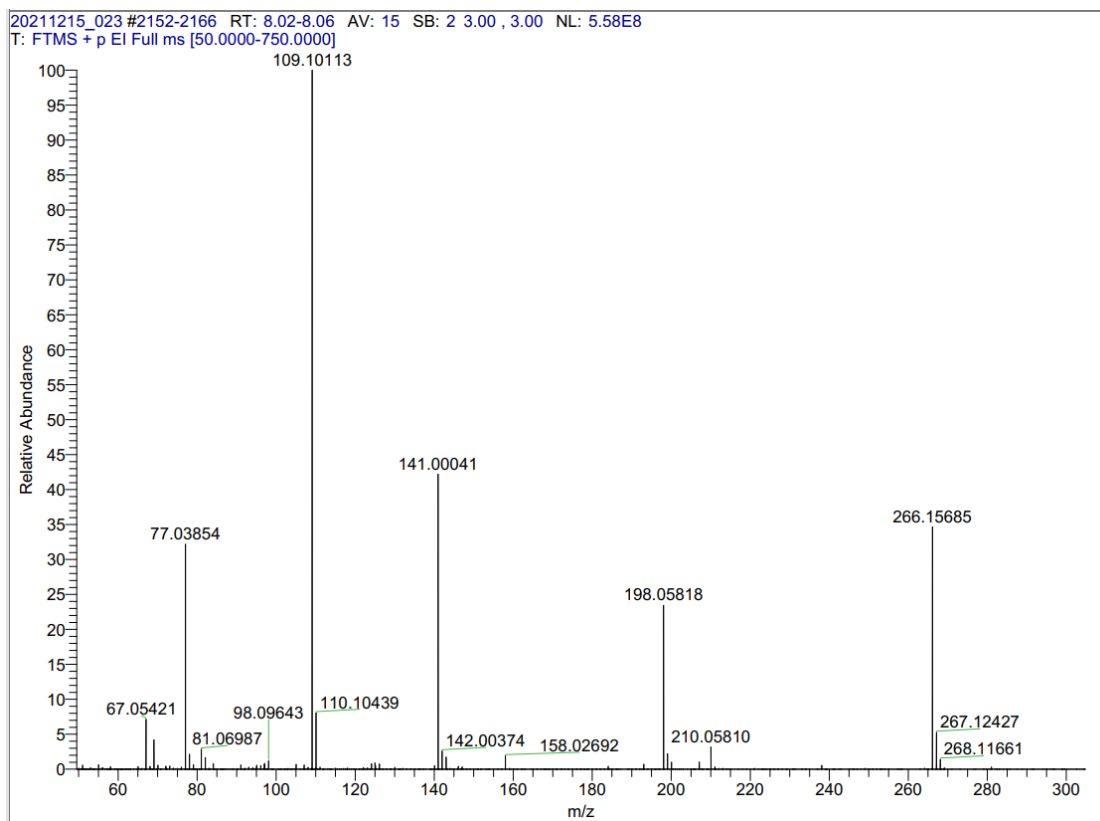

## 8) Isotope labelling experiment

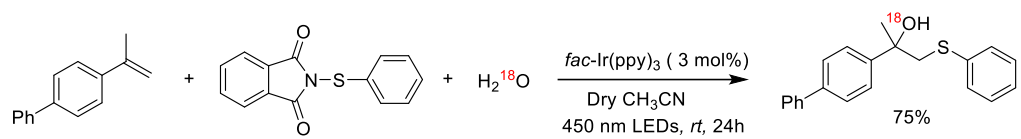

detected by HRMS

HRMS (ES<sup>+</sup>) Calcd [M+Na]<sup>+</sup>: 345.1170

Found: 345.1180

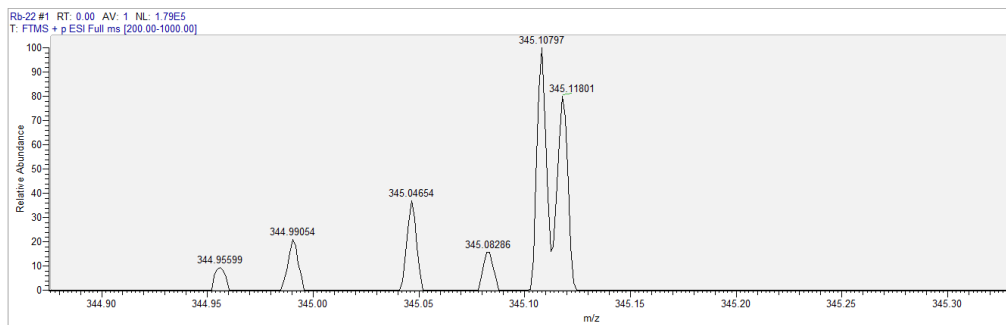

## 9) References

- [1] X.-T. Li and X.-Y. Liu, *Angew. Chem. Int. Ed.* 2018, **57**, 7668.
- [2] X. Lu, S.-J. He and Y. Fu, *Chem. Sci.* 2019, **10**, 809.
- [3] S. E. Denmark, D. J. P. Kornfilt and H. Wang, *Nat. Chem.* 2014, **6**, 1056.
- [4] J. Klose, C. B. Reese and Q. Song, *Tetrahedron* 1997, **53**, 14411.
- [5] C.-Y. Huang and A. G. Doyle, *J. Am. Chem. Soc.* 2012, **134**, 9541.

## 2. Characterization data of the products

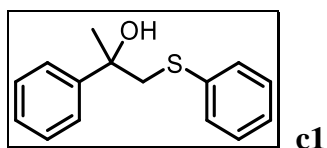

Purification by column chromatography on silica gel (hexane/ethyl acetate = 10/1, v/v) afforded **c1** as a colorless oil (44.9 mg, 92% yield). **<sup>1</sup>H NMR** (400 MHz, CDCl<sub>3</sub>) δ 7.49 (dd, *J* = 5.2, 3.4 Hz, 2H), 7.37 (dd, *J* = 11.3, 4.4 Hz, 4H), 7.32 – 7.23 (m, 3H), 7.20 (ddd, *J* = 7.3, 3.6, 1.2 Hz, 1H), 3.57 (d, *J* = 13.3 Hz, 1H), 3.39 (d, *J* = 13.3 Hz, 1H), 2.91 (s, 1H), 1.65 (s, 3H); **<sup>13</sup>C NMR** (101 MHz, CDCl<sub>3</sub>) δ 146.2, 136.5, 130.0, 130.0, 128.3, 127.1, 126.4, 124.8, 74.0, 49.6, 29.4.

**HRMS** (ESI) *m/z* calcd. for C<sub>15</sub>H<sub>16</sub>OSNa [M+Na]<sup>+</sup> : 267.0814, found: 267.0814.

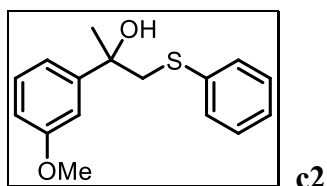

Purification by column chromatography on silica gel (hexane/ethyl acetate = 10/1, v/v) afforded **c2** as a colorless oil (39.4 mg, 72% yield). **<sup>1</sup>H NMR** (400 MHz, CDCl<sub>3</sub>) δ 7.35 – 7.30 (m, 2H), 7.26 – 7.19 (m, 3H), 7.18 – 7.12 (m, 1H), 7.05 – 6.96 (m, 2H), 6.77 (ddd, *J* = 8.2, 2.6, 0.8 Hz, 1H), 3.79 (s, 3H), 3.53 (d, *J* = 13.3 Hz, 1H), 3.32 (d, *J* = 13.3 Hz, 1H), 2.93 (s, 1H), 1.60 (s, 3H); **<sup>13</sup>C NMR** (101 MHz, CDCl<sub>3</sub>) δ 159.6, 148.0, 136.5, 130.0, 129.3, 128.9, 126.4, 117.2, 112.3, 111.0, 74.0, 55.2, 49.5, 29.4.

**HRMS** (ESI) *m/z* calcd. for C<sub>16</sub>H<sub>18</sub>O<sub>2</sub>SNa [M+Na]<sup>+</sup> : 297.0920, found: 297.0920.

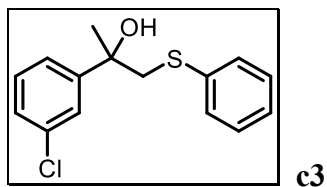

Purification by column chromatography on silica gel (hexane/ethyl acetate = 10/1, v/v) afforded **c3** as a pale yellow oil (41.7 mg, 75% yield). **<sup>1</sup>H NMR** (400 MHz, CDCl<sub>3</sub>) δ 7.47 (t, *J* = 1.8 Hz, 1H), 7.37 – 7.33 (m, 2H), 7.32 (dt, *J* = 7.3, 1.8 Hz, 1H), 7.29 – 7.24 (m, 2H), 7.24 – 7.17 (m, 3H), 3.52 (d, *J* = 13.5 Hz, 1H), 3.34 (d, *J* = 13.5 Hz, 1H), 2.99 (d, *J* = 20.7 Hz, 1H), 1.61 (s, 3H); **<sup>13</sup>C NMR** (101 MHz, CDCl<sub>3</sub>) δ 148.4, 136.0, 134.3,

130.3, 129.5, 129.0, 127.2, 126.7, 125.4, 123.1, 73.8, 49.5, 29.4.

**HRMS** (ESI)  $m/z$  calcd. for  $C_{15}H_{15}ClOSNa$   $[M+Na]^+$  : 301.0424, found: 301.0423.

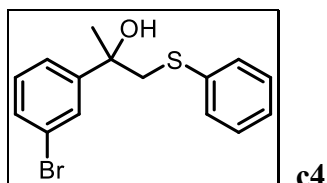

Purification by column chromatography on silica gel (hexane/ethyl acetate = 10/1, v/v) afforded **c4** as a colorless oil (52.2 mg, 81% yield).  **$^1H$  NMR** (400 MHz,  $CDCl_3$ )  $\delta$  7.62 (t,  $J = 1.8$  Hz, 1H), 7.41 – 7.31 (m, 4H), 7.29 – 7.23 (m, 2H), 7.22 – 7.15 (m, 2H), 3.56 – 3.47 (m, 1H), 3.34 (d,  $J = 13.5$  Hz, 1H), 3.00 (s, 1H), 1.61 (s, 3H);  **$^{13}C$  NMR** (101 MHz,  $CDCl_3$ )  $\delta$  148.6, 135.9, 130.3, 130.2, 129.8, 129.0, 128.3, 126.7, 123.6, 122.6, 73.7, 49.4, 29.4.

**HRMS** (ESI)  $m/z$  calcd. for  $C_{15}H_{15}BrOSNa$   $[M+Na]^+$  : 344.9919, found: 344.9916.

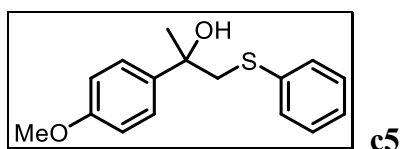

Purification by column chromatography on silica gel (hexane/ethyl acetate = 10/1, v/v) afforded **c5** as a pale yellow oil (42.3 mg, 77% yield).  **$^1H$  NMR** (400 MHz,  $CDCl_3$ )  $\delta$  7.44 – 7.33 (m, 4H), 7.26 (t,  $J = 7.4$  Hz, 2H), 7.20 (d,  $J = 7.3$  Hz, 1H), 6.92 – 6.85 (m, 2H), 3.82 (s, 3H), 3.55 (d,  $J = 13.2$  Hz, 1H), 3.35 (d,  $J = 13.2$  Hz, 1H), 2.90 (s, 1H), 1.63 (s, 3H);  **$^{13}C$  NMR** (101 MHz,  $CDCl_3$ )  $\delta$  158.6, 138.4, 136.6, 129.9, 130.0, 126.4, 126.1, 113.6, 73.7, 55.3, 49.6, 29.4.

**HRMS** (ESI)  $m/z$  calcd. for  $C_{16}H_{18}O_2SNa$   $[M+Na]^+$  : 297.0920, found: 297.0917.

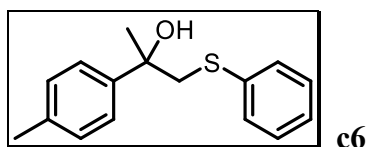

Purification by column chromatography on silica gel (hexane/ethyl acetate = 10/1, v/v) afforded **c6** as a yellow oil (42.3 mg, 82% yield).  **$^1H$  NMR** (400 MHz,  $CDCl_3$ )  $\delta$  7.42 – 7.34 (m, 4H), 7.30 – 7.23 (m, 2H), 7.23 – 7.15 (m, 3H), 3.58 (d,  $J = 13.2$  Hz, 1H), 3.37 (d,  $J = 13.2$  Hz, 1H), 2.91 (s, 1H), 2.37 (s, 3H), 1.65 (s, 3H);  **$^{13}C$  NMR** (101 MHz,  $CDCl_3$ )  $\delta$  143.3, 136.8, 136.7, 129.9, 129.0, 130.0, 126.3, 124.8, 73.9, 49.6, 29.4, 21.0.

**HRMS** (ESI)  $m/z$  calcd. for  $C_{16}H_{18}OSNa$   $[M+Na]^+$  : 281.0971, found: 281.0971.

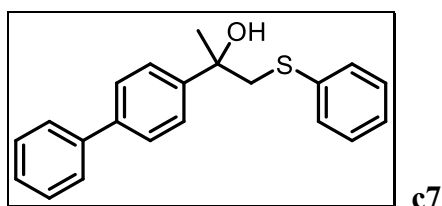

Purification by column chromatography on silica gel (hexane/ethyl acetate = 10/1, v/v) afforded **c7** as a white solid (58.2 mg, 91% yield).  **$^1H$  NMR** (400 MHz,  $CDCl_3$ )  $\delta$  7.56 (dt,  $J$  = 3.1, 2.0 Hz, 2H), 7.54 – 7.46 (m, 4H), 7.45 – 7.38 (m, 2H), 7.36 – 7.29 (m, 3H), 7.23 – 7.17 (m, 2H), 7.16 – 7.11 (m, 1H), 3.56 (d,  $J$  = 13.4 Hz, 1H), 3.36 (d,  $J$  = 13.4 Hz, 1H), 2.96 (s, 1H), 1.64 (s, 3H);  **$^{13}C$  NMR** (101 MHz,  $CDCl_3$ )  $\delta$  145.3, 140.8, 140.0, 136.4, 130.2, 129.0, 128.8, 127.3, 127.1, 127.0, 126.5, 125.4, 74.0, 49.6, 29.4.

**HRMS** (ESI)  $m/z$  calcd. for  $C_{21}H_{20}OSNa$   $[M+Na]^+$  : 343.1127, found: 343.1123

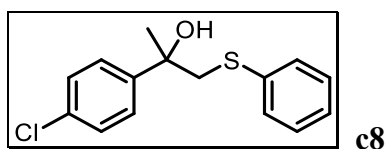

Purification by column chromatography on silica gel (hexane/ethyl acetate = 10/1, v/v) afforded **c8** as a colorless oil (41.7 mg, 75% yield).  **$^1H$  NMR** (400 MHz,  $CDCl_3$ )  $\delta$  7.38 – 7.33 (m, 2H), 7.32 – 7.28 (m, 2H), 7.28 – 7.14 (m, 5H), 3.49 (d,  $J$  = 13.4 Hz, 1H), 3.31 (d,  $J$  = 13.4 Hz, 1H), 2.93 (s, 1H), 1.58 (s, 3H);  **$^{13}C$  NMR** (101 MHz,  $CDCl_3$ )  $\delta$  144.7, 136.1, 132.9, 130.2, 129.0, 128.3, 126.6, 126.4, 73.8, 49.6, 29.4.

**HRMS** (ESI)  $m/z$  calcd. for  $C_{15}H_{15}ClOSNa$   $[M+Na]^+$  : 301.0424, found: 301.0420.

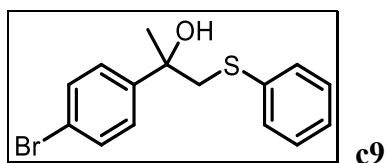

Purification by column chromatography on silica gel (hexane/ethyl acetate = 10/1, v/v) afforded **c9** as a colorless oil (48.9 mg, 76% yield).  **$^1H$  NMR** (400 MHz,  $CDCl_3$ )  $\delta$  7.46 – 7.41 (m, 2H), 7.36 – 7.29 (m, 4H), 7.29 – 7.18 (m, 3H), 3.51 (d,  $J$  = 13.4 Hz, 1H), 3.34 (d,  $J$  = 13.4 Hz, 1H), 2.99 (s, 1H), 1.61 (s, 3H);  **$^{13}C$  NMR** (101 MHz,  $CDCl_3$ )  $\delta$  145.2, 136.0, 131.3, 130.3, 129.0, 126.8, 126.6, 121.1, 73.8, 49.5, 29.4.

**HRMS** (ESI)  $m/z$  calcd. for  $C_{15}H_{15}BrOSNa$   $[M+Na]^+$  : 344.9919, found: 344.9914.

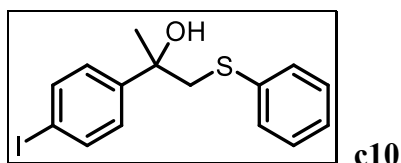

Purification by column chromatography on silica gel (hexane/ethyl acetate = 10/1, v/v) afforded **c10** as a pale yellow oil (50.3 mg, 68% yield). **<sup>1</sup>H NMR** (400 MHz, CDCl<sub>3</sub>) δ 7.63 – 7.57 (m, 2H), 7.31 – 7.26 (m, 2H), 7.24 – 7.13 (m, 5H), 3.48 (d, *J* = 13.4 Hz, 1H), 3.29 (d, *J* = 13.4 Hz, 1H), 2.95 (s, 1H), 1.56 (s, 3H); **<sup>13</sup>C NMR** (101 MHz, CDCl<sub>3</sub>) δ 145.9, 137.3, 136.0, 130.3, 129.0, 127.1, 126.6, 92.8, 73.8, 49.4, 29.4.

**HRMS** (ESI) *m/z* calcd. for C<sub>15</sub>H<sub>15</sub>IOSNa [M+Na]<sup>+</sup> : 392.9780, found: 392.9781.

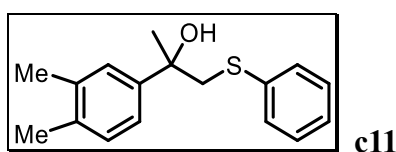

Purification by column chromatography on silica gel (hexane/ethyl acetate = 10/1, v/v) afforded **c11** as a colorless oil (46.2 mg, 85% yield). **<sup>1</sup>H NMR** (400 MHz, CDCl<sub>3</sub>) δ 7.40 – 7.35 (m, 2H), 7.30 – 7.23 (m, 3H), 7.23 – 7.17 (m, 2H), 7.13 (d, *J* = 7.8 Hz, 1H), 3.58 (d, *J* = 13.2 Hz, 1H), 3.37 (d, *J* = 13.2 Hz, 1H), 2.89 (s, 1H), 2.28 (d, *J* = 4.8 Hz, 6H), 1.64 (s, 3H); **<sup>13</sup>C NMR** (101 MHz, CDCl<sub>3</sub>) δ 143.7, 136.7, 136.4, 135.4, 129.9, 129.6, 128.9, 126.3, 126.1, 122.2, 73.8, 49.6, 29.5, 20.0, 19.4.

**HRMS** (ESI) *m/z* calcd. for C<sub>17</sub>H<sub>20</sub>OSNa [M+Na]<sup>+</sup> : 295.1127, found: 295.1122.

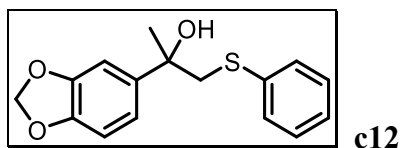

Purification by column chromatography on silica gel (hexane/ethyl acetate = 10/1, v/v) afforded **c12** as a brown oil (49.5 mg, 86% yield). **<sup>1</sup>H NMR** (400 MHz, CDCl<sub>3</sub>) δ 7.39 – 7.33 (m, 2H), 7.25 (ddd, *J* = 6.1, 5.5, 2.1 Hz, 2H), 7.22 – 7.16 (m, 1H), 6.96 (d, *J* = 1.8 Hz, 1H), 6.92 (dd, *J* = 8.1, 1.9 Hz, 1H), 6.77 (dd, *J* = 7.7, 4.0 Hz, 1H), 5.95 (dd, *J* = 3.1, 1.4 Hz, 2H), 3.52 (d, *J* = 13.3 Hz, 1H), 3.32 (d, *J* = 13.3 Hz, 1H), 2.94 (s, 1H), 1.60 (s, 3H); **<sup>13</sup>C NMR** (101 MHz, CDCl<sub>3</sub>) δ 147.6, 146.5, 140.4, 136.4, 130.0, 128.9, 126.4, 118.1, 107.9, 106.0, 101.0, 73.9, 49.7, 29.5.

**HRMS** (ESI) *m/z* calcd. for C<sub>16</sub>H<sub>16</sub>O<sub>3</sub>SNa [M+Na]<sup>+</sup> : 311.0812, found: 311.0709.

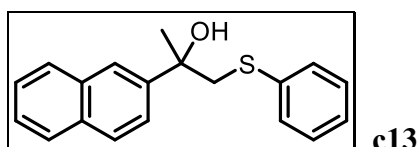

Purification by column chromatography on silica gel (hexane/ethyl acetate = 10/1, v/v) afforded **c13** as a colorless oil (38.8 mg, 66% yield). **<sup>1</sup>H NMR** (400 MHz, CDCl<sub>3</sub>) δ 7.93 (s, 1H), 7.85 – 7.73 (m, 3H), 7.52 – 7.41 (m, 3H), 7.34 – 7.28 (m, 2H), 7.20 – 7.07 (m, 3H), 3.63 (d, *J* = 13.3 Hz, 1H), 3.41 (d, *J* = 13.3 Hz, 1H), 3.05 (s, 1H), 1.68 (s, 3H); **<sup>13</sup>C NMR** (101 MHz, CDCl<sub>3</sub>) δ 143.6, 136.4, 133.2, 132.5, 130.1, 129.0, 128.3, 128.1, 127.5, 126.5, 126.2, 126.0, 123.6, 123.3, 74.2, 49.5, 29.4.

**HRMS** (ESI) *m/z* calcd. for C<sub>19</sub>H<sub>18</sub>OSNa [M+Na]<sup>+</sup> : 317.0971, found: 317.0963.

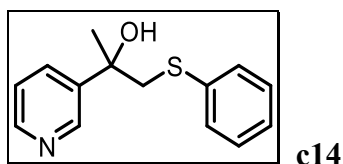

Purification by column chromatography on silica gel (hexane/ethyl acetate = 5/1, v/v) afforded **c14** as a yellow oil (27.0 mg, 55% yield). **<sup>1</sup>H NMR** (400 MHz, CDCl<sub>3</sub>) δ 8.68 (d, *J* = 2.3 Hz, 1H), 8.44 (dd, *J* = 4.8, 1.6 Hz, 1H), 7.84 – 7.72 (m, 1H), 7.37 – 7.27 (m, 2H), 7.25 – 7.13 (m, 4H), 3.71 (dt, *J* = 25.7, 12.9 Hz, 1H), 3.49 (d, *J* = 13.4 Hz, 1H), 3.37 (d, *J* = 13.4 Hz, 1H), 1.65 (s, 3H); **<sup>13</sup>C NMR** (101 MHz, CDCl<sub>3</sub>) δ 148.1, 146.8, 141.7, 135.9, 132.9, 130.2, 129.0, 126.7, 123.0, 72.9, 49.33, 29.2.

**HRMS** (ESI) *m/z* calcd. for C<sub>14</sub>H<sub>16</sub>NOS [M+H]<sup>+</sup> : 246.0947, found: 246.0947

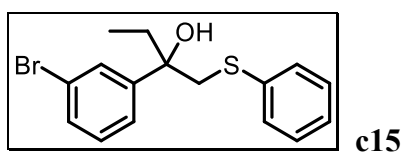

Purification by column chromatography on silica gel (hexane/ethyl acetate = 10/1, v/v) afforded **c15** as a colorless oil (55.1 mg, 82% yield). **<sup>1</sup>H NMR** (400 MHz, CDCl<sub>3</sub>) δ 7.57 (s, 1H), 7.39 – 7.28 (m, 4H), 7.25 (dd, *J* = 13.1, 6.1 Hz, 2H), 7.21 – 7.14 (m, 2H), 3.55 (d, *J* = 13.4 Hz, 1H), 3.35 (d, *J* = 13.4 Hz, 1H), 2.96 (s, 1H), 1.89 (qq, *J* = 14.5, 7.4 Hz, 2H), 0.79 (t, *J* = 7.4 Hz, 3H); **<sup>13</sup>C NMR** (101 MHz, CDCl<sub>3</sub>) δ 146.9, 136.0, 130.4, 130.0, 129.7, 129.0, 128.9, 126.7, 124.2, 122.6, 76.2, 48.7, 34.7, 8.0.

**HRMS** (ESI) *m/z* calcd. for C<sub>16</sub>H<sub>17</sub>BrOSNa [M+Na]<sup>+</sup> : 359.0076, found: 359.0076.



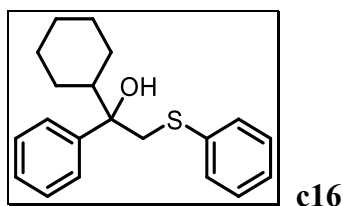

Purification by column chromatography on silica gel (hexane/ethyl acetate = 10/1, v/v) afforded **c16** as a colorless oil (37.4 mg, 60% yield). **<sup>1</sup>H NMR** (400 MHz, CDCl<sub>3</sub>) δ 7.40 (dd, *J* = 5.3, 3.4 Hz, 2H), 7.37 – 7.30 (m, 4H), 7.26 (ddd, *J* = 14.6, 5.2, 3.8 Hz, 3H), 7.18 (ddd, *J* = 7.4, 3.6, 1.2 Hz, 1H), 3.81 (d, *J* = 12.9 Hz, 1H), 3.46 (d, *J* = 12.9 Hz, 1H), 2.93 (s, 1H), 1.91 (d, *J* = 12.7 Hz, 1H), 1.80 – 1.66 (m, 3H), 1.57 (dd, *J* = 13.1, 10.6 Hz, 2H), 1.26 – 0.96 (m, 5H); **<sup>13</sup>C NMR** (101 MHz, CDCl<sub>3</sub>) δ 144.1, 136.8, 130.1, 128.9, 127.8, 126.9, 126.4, 126.2, 78.0, 48.2, 46.4, 27.6, 27.1, 26.6, 26.5, 26.3.

**HRMS** (ESI) *m/z* calcd. for C<sub>20</sub>H<sub>24</sub>OSNa [M+Na]<sup>+</sup> : 335.1440, found: 335.1437

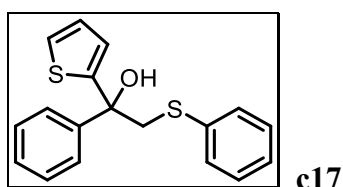

Purification by column chromatography on silica gel (hexane/ethyl acetate = 10/1, v/v) afforded **c17** as a yellow oil (31.2 mg, 50% yield). **<sup>1</sup>H NMR** (400 MHz, CDCl<sub>3</sub>) δ 7.57 (dd, *J* = 5.3, 3.5 Hz, 2H), 7.45 – 7.36 (m, 4H), 7.35 – 7.30 (m, 3H), 7.29 – 7.22 (m, 2H), 7.00 – 6.94 (m, 2H), 3.98 (d, *J* = 13.5 Hz, 1H), 3.91 – 3.84 (m, 2H); **<sup>13</sup>C NMR** (101 MHz, CDCl<sub>3</sub>) δ 150.5, 144.4, 136.2, 130.5, 129.1, 128.4, 127.8, 126.9, 126.7, 125.7, 125.5, 124.7, 76.6, 50.4.

**HRMS** (ESI) *m/z* calcd. for C<sub>18</sub>H<sub>16</sub>OS<sub>2</sub>Na [M+Na]<sup>+</sup> : 335.0535, found: 335.0534.

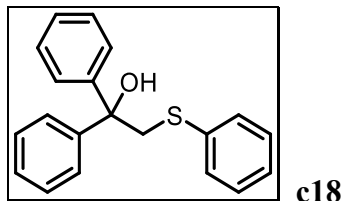

Purification by column chromatography on silica gel (hexane/ethyl acetate = 10/1, v/v) afforded **c18** as a white solid (53.2 mg, 87% yield). **<sup>1</sup>H NMR** (400 MHz, CDCl<sub>3</sub>) δ 7.58 – 7.49 (m, 4H), 7.48 – 7.42 (m, 2H), 7.42 – 7.35 (m, 4H), 7.32 (ddd, *J* = 8.7, 5.5, 1.4 Hz, 4H), 7.28 – 7.22 (m, 1H), 3.95 (s, 2H), 3.67 (s, 1H); **<sup>13</sup>C NMR** (101 MHz, CDCl<sub>3</sub>) δ 145.2, 136.6, 130.3, 129.1, 128.4, 127.4, 126.7, 126.2, 77.8, 49.1.

**HRMS** (ESI)  $m/z$  calcd. for  $C_{20}H_{18}OSNa$   $[M+Na]^+$  : 329.0971, found: 329.0967.

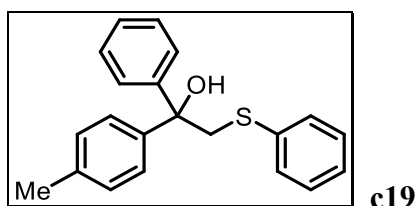

Purification by column chromatography on silica gel (hexane/ethyl acetate = 10/1, v/v) afforded **c19** as a colorless oil (59.5 mg, 93% yield).  **$^1H$  NMR** (400 MHz,  $CDCl_3$ )  $\delta$  7.50 (qd,  $J = 3.2, 1.9$  Hz, 2H), 7.46 – 7.33 (m, 6H), 7.32 – 7.26 (m, 3H), 7.26 – 7.20 (m, 1H), 7.18 (d,  $J = 7.9$  Hz, 2H), 3.94 (d,  $J = 13.3$  Hz, 1H), 3.88 (d,  $J = 13.3$  Hz, 1H), 3.58 (s, 1H), 2.37 (s, 3H).  **$^{13}C$  NMR** (101 MHz,  $CDCl_3$ )  $\delta$  145.4, 142.3, 137.1, 136.7, 130.2, 129.0, 129.0, 128.3, 127.3, 126.6, 126.2, 77.6, 49.1, 21.1.

**HRMS** (ESI)  $m/z$  calcd. for  $C_{21}H_{20}OSNa$   $[M+Na]^+$  : 343.1127, found: 343.1128.

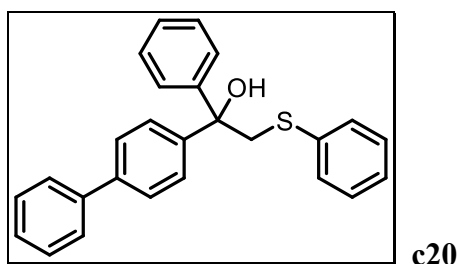

Purification by column chromatography on silica gel (hexane/ethyl acetate = 10/1, v/v) afforded **c20** as a white solid (68.8 mg, 90% yield).  **$^1H$  NMR** (400 MHz,  $CDCl_3$ )  $\delta$  7.69 – 7.58 (m, 8H), 7.55 – 7.46 (m, 4H), 7.46 – 7.39 (m, 3H), 7.39 – 7.30 (m, 3H), 7.27 (dd,  $J = 8.4, 6.1$  Hz, 1H), 4.04 – 3.95 (m, 2H), 3.75 (s, 1H);  **$^{13}C$  NMR** (101 MHz,  $CDCl_3$ )  $\delta$  145.2, 144.3, 140.7, 140.2, 136.6, 130.4, 129.1, 128.9, 128.5, 127.5, 127.4, 127.2, 127.1, 126.8, 126.3, 77.7, 49.1.

**HRMS** (ESI)  $m/z$  calcd. for  $C_{26}H_{22}OSNa$   $[M+Na]^+$  : 405.1284, found: 405.1279

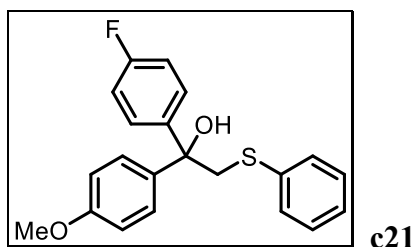

Purification by column chromatography on silica gel (hexane/ethyl acetate = 10/1, v/v) afforded **c21** as a colorless oil (60.9 mg, 86% yield).  **$^1H$  NMR** (400 MHz,  $CDCl_3$ )  $\delta$  7.47 – 7.35 (m, 6H), 7.32 – 7.26 (m, 2H), 7.26 – 7.20 (m, 1H), 7.05 – 6.98 (m, 2H),

6.91 – 6.85 (m, 2H), 3.92 – 3.86 (m, 1H), 3.84 – 3.78 (m, 4H), 3.63 (d,  $J = 4.3$  Hz, 1H);  $^{13}\text{C}$  NMR (101 MHz,  $\text{CDCl}_3$ )  $\delta$  161.9 (d,  $J = 247.0$  Hz), 158.9, 141.3 (d,  $J = 3.2$  Hz), 137.2, 136.4, 130.4, 129.1, 128.0 (d,  $J = 8.1$  Hz), 127.5, 126.8, 115.0 (d,  $J = 21.4$  Hz), 113.7, 77.2, 55.3, 49.3;  $^{19}\text{F}$  NMR (376 MHz,  $\text{CDCl}_3$ )  $\delta$  -115.40.

**HRMS** (ESI)  $m/z$  calcd. for  $\text{C}_{21}\text{H}_{19}\text{FO}_2\text{SNa}$   $[\text{M}+\text{Na}]^+$  : 377.0982, found: 377.0982.

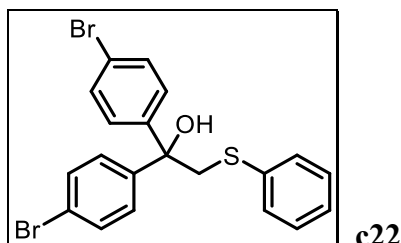

Purification by column chromatography on silica gel (hexane/ethyl acetate = 10/1, v/v) afforded **c22** as a pale-yellow oil (61.2 mg, 66% yield).  $^1\text{H}$  NMR (400 MHz,  $\text{CDCl}_3$ )  $\delta$  7.46 – 7.42 (m, 4H), 7.38 – 7.34 (m, 2H), 7.32 – 7.23 (m, 7H), 3.80 (s, 2H), 3.66 (s, 1H).  $^{13}\text{C}$  NMR (101 MHz,  $\text{CDCl}_3$ )  $\delta$  143.7, 135.7, 131.5, 130.7, 129.2, 127.9, 127.1, 121.7, 77.2, 48.8.

**HRMS** (ESI)  $m/z$  calcd. for  $\text{C}_{20}\text{H}_{16}\text{Br}_2\text{OSNa}$   $[\text{M}+\text{Na}]^+$  : 486.9160, found: 486.9166.

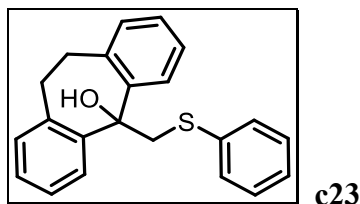

Purification by column chromatography on silica gel (hexane/ethyl acetate = 10/1, v/v) afforded **c23** as a pale-yellow oil (54.4 mg, 82% yield).  $^1\text{H}$  NMR (400 MHz,  $\text{CDCl}_3$ )  $\delta$  8.00 (d,  $J = 8.0$  Hz, 2H), 7.28 (d,  $J = 2.8$  Hz, 2H), 7.26 – 7.12 (m, 7H), 7.08 (d,  $J = 7.4$  Hz, 2H), 3.93 (s, 2H), 3.57 (s, 1H), 3.39 (ddd,  $J = 14.0, 8.7, 4.9$  Hz, 2H), 3.04 – 2.92 (m, 2H);  $^{13}\text{C}$  NMR (101 MHz,  $\text{CDCl}_3$ )  $\delta$  142.3, 138.5, 135.7, 130.5, 130.5, 128.8, 127.9, 126.8, 126.5, 126.4, 77.2, 50.5, 34.3.

**HRMS** (ESI)  $m/z$  calcd. for  $\text{C}_{22}\text{H}_{20}\text{OSNa}$   $[\text{M}+\text{Na}]^+$  : 355.1127, found: 355.1124.

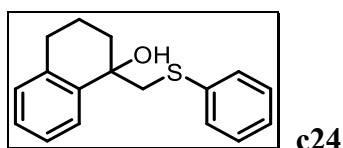

Purification by column chromatography on silica gel (hexane/ethyl acetate = 10/1, v/v) afforded **c24** as a colorless oil (43.2 mg, 80% yield).  $^1\text{H}$  NMR (400 MHz,  $\text{CDCl}_3$ )  $\delta$

7.66 – 7.58 (m, 1H), 7.45 (dt,  $J = 8.5, 1.8$  Hz, 2H), 7.38 – 7.28 (m, 2H), 7.27 – 7.19 (m, 3H), 7.15 – 7.08 (m, 1H), 3.51 (d,  $J = 13.4$  Hz, 1H), 3.41 (dd,  $J = 13.4, 0.9$  Hz, 1H), 2.89 – 2.74 (m, 2H), 2.70 (s, 1H), 2.29 (ddd,  $J = 10.5, 7.1, 2.9$  Hz, 1H), 1.95 – 1.82 (m, 2H), 1.80 – 1.66 (m, 1H).  $^{13}\text{C}$  NMR (101 MHz,  $\text{CDCl}_3$ )  $\delta$  140.6, 137.0, 136.9, 129.8, 129.0, 128.9, 127.6, 126.4, 126.4, 126.3, 74.0, 53.0, 35.1, 29.2, 19.6.

**HRMS** (ESI)  $m/z$  calcd. for  $\text{C}_{17}\text{H}_{18}\text{OSNa}$   $[\text{M}+\text{Na}]^+$  : 293.0971, found: 293.0967.

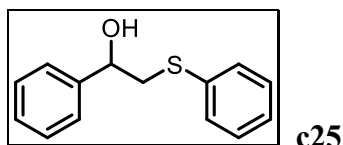

Purification by column chromatography on silica gel (hexane/ethyl acetate = 10/1, v/v) afforded **c25** as a colorless oil (36.8 mg, 80% yield).  $^1\text{H}$  NMR (400 MHz,  $\text{CDCl}_3$ )  $\delta$  7.50 – 7.42 (m, 2H), 7.42 – 7.31 (m, 7H), 7.30 – 7.24 (m, 1H), 4.75 (dd,  $J = 9.4, 1.3$  Hz, 1H), 3.35 (dd,  $J = 13.8, 3.6$  Hz, 1H), 3.13 (dd,  $J = 13.8, 9.4$  Hz, 1H), 2.98 (d,  $J = 1.8$  Hz, 1H);  $^{13}\text{C}$  NMR (101 MHz,  $\text{CDCl}_3$ )  $\delta$  142.2, 135.0, 130.2, 129.2, 128.6, 128.0, 126.8, 125.9, 71.7, 44.0.

**HRMS** (ESI)  $m/z$  calcd. for  $\text{C}_{14}\text{H}_{14}\text{OSNa}$   $[\text{M}+\text{Na}]^+$  : 253.0658, found: 253.0657.

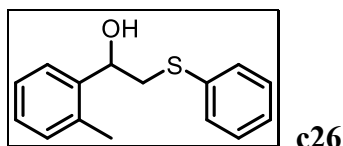

Purification by column chromatography on silica gel (hexane/ethyl acetate = 10/1, v/v) afforded **c26** as a colorless oil (42.9 mg, 88% yield).  $^1\text{H}$  NMR (500 MHz,  $\text{CDCl}_3$ )  $\delta$  7.58 (dd,  $J = 7.6, 0.8$  Hz, 1H), 7.53 – 7.48 (m, 2H), 7.40 – 7.33 (m, 2H), 7.29 (tdd,  $J = 9.8, 5.2, 4.2$  Hz, 2H), 7.23 (td,  $J = 7.4, 1.4$  Hz, 1H), 7.15 (d,  $J = 7.4$  Hz, 1H), 4.96 (dd,  $J = 9.7, 2.5$  Hz, 1H), 3.31 (dd,  $J = 13.9, 3.1$  Hz, 1H), 3.06 (dd,  $J = 13.9, 9.7$  Hz, 1H), 2.98 (s, 1H), 2.21 (s, 3H);  $^{13}\text{C}$  NMR (126 MHz,  $\text{CDCl}_3$ )  $\delta$  140.2, 134.9, 134.5, 130.7, 130.5, 129.2, 127.7, 127.0, 126.5, 125.4, 68.2, 43.2, 18.9.

**HRMS** (ESI)  $m/z$  calcd. for  $\text{C}_{15}\text{H}_{16}\text{OS}$   $[\text{M}]^+$  : 244.0922, found: 244.0914.

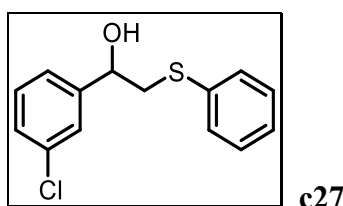

Purification by column chromatography on silica gel (hexane/ethyl acetate = 10/1, v/v) afforded **c27** as a colorless oil (26.9 mg, 51% yield).  $^1\text{H NMR}$  (400 MHz,  $\text{CDCl}_3$ )  $\delta$  7.45 (dd,  $J = 8.3, 1.1$  Hz, 2H), 7.39 – 7.31 (m, 3H), 7.31 – 7.25 (m, 3H), 7.24 (dd,  $J = 2.6, 1.2$  Hz, 1H), 4.69 (dt,  $J = 9.5, 2.8$  Hz, 1H), 3.32 (dd,  $J = 13.9, 3.4$  Hz, 1H), 3.05 (dd,  $J = 13.9, 9.5$  Hz, 1H), 2.99 (s, 1H);  $^{13}\text{C NMR}$  (101 MHz,  $\text{CDCl}_3$ )  $\delta$  144.1, 136.9, 134.5, 130.5, 129.8, 129.2, 128.1, 127.1, 126.1, 124.0, 71.0, 44.2.

**HRMS** (ESI)  $m/z$  calcd. for  $\text{C}_{14}\text{H}_{13}\text{ClOSNa}$   $[\text{M}+\text{Na}]^+$  : 287.0268, found: 287.0266.

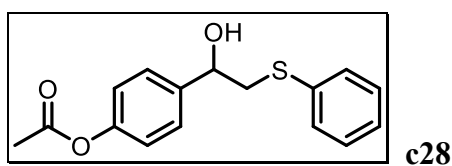

Purification by column chromatography on silica gel (hexane/ethyl acetate = 10/1, v/v) afforded **c28** as a colorless oil (50.0 mg, 85% yield).  $^1\text{H NMR}$  (400 MHz,  $\text{CDCl}_3$ )  $\delta$  7.46 – 7.40 (m, 2H), 7.40 – 7.29 (m, 4H), 7.26 (dt,  $J = 9.4, 4.4$  Hz, 1H), 7.06 (t,  $J = 9.2$  Hz, 2H), 4.72 (dd,  $J = 9.3, 3.2$  Hz, 1H), 3.36 – 3.25 (m, 1H), 3.07 (dt,  $J = 16.2, 10.6$  Hz, 2H), 2.31 (s, 3H);  $^{13}\text{C NMR}$  (101 MHz, DMSO)  $\delta$  169.7, 150.0, 142.2, 134.8, 129.4, 128.4, 127.7, 125.9, 121.9, 71.2, 41.9, 21.3.

**HRMS** (ESI)  $m/z$  calcd. for  $\text{C}_{16}\text{H}_{16}\text{O}_3\text{SNa}$   $[\text{M}+\text{Na}]^+$  : 311.0712, found: 311.0713.

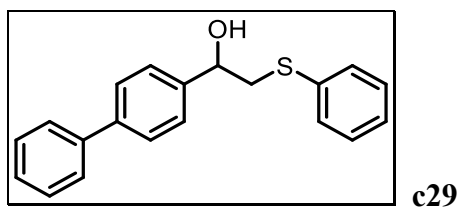

Purification by column chromatography on silica gel (hexane/ethyl acetate = 10/1, v/v) afforded **c29** as a white solid (55.1 mg, 90% yield).  $^1\text{H NMR}$  (400 MHz,  $\text{CDCl}_3$ )  $\delta$  7.65 – 7.58 (m, 4H), 7.51 – 7.43 (m, 6H), 7.42 – 7.32 (m, 3H), 7.31 – 7.25 (m, 1H), 4.80 (d,  $J = 9.2$  Hz, 1H), 3.39 (dd,  $J = 13.8, 3.6$  Hz, 1H), 3.17 (dd,  $J = 13.8, 9.4$  Hz, 1H), 3.03 (s, 1H);  $^{13}\text{C NMR}$  (101 MHz,  $\text{CDCl}_3$ )  $\delta$  141.2, 140.9, 140.8, 134.9, 130.3, 129.2, 128.8, 127.4, 127.3, 127.1, 126.8, 126.4, 71.5, 44.0.

**HRMS** (ESI)  $m/z$  calcd. for  $\text{C}_{20}\text{H}_{18}\text{OSNa}$   $[\text{M}+\text{Na}]^+$  : 329.0971, found: 329.0966.

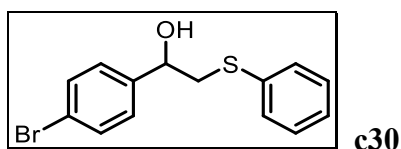

Purification by column chromatography on silica gel (hexane/ethyl acetate = 10/1, v/v) afforded **c30** as a colorless oil (38.7 mg, 63% yield). <sup>1</sup>H NMR (400 MHz, CDCl<sub>3</sub>) δ 7.47 – 7.42 (m, 2H), 7.40 (dt, *J* = 3.4, 2.0 Hz, 2H), 7.34 – 7.27 (m, 2H), 7.25 (dt, *J* = 4.8, 1.9 Hz, 1H), 7.23 – 7.17 (m, 2H), 4.65 (dd, *J* = 9.3, 3.6 Hz, 1H), 3.26 (dd, *J* = 13.9, 3.6 Hz, 1H), 3.07 – 3.01 (m, 1H), 2.99 (s, 1H); <sup>13</sup>C NMR (101 MHz, CDCl<sub>3</sub>) δ 141.1, 134.5, 131.6, 130.4, 129.2, 127.6, 127.0, 121.8, 71.0, 44.0.

**HRMS** (ESI) *m/z* calcd. for C<sub>14</sub>H<sub>13</sub>BrOSNa [M+Na]<sup>+</sup> : 330.9763, found: 330.9753.

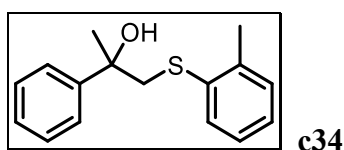

Purification by column chromatography on silica gel (hexane/ethyl acetate = 10/1, v/v) afforded **c34** as a colorless oil (37.7 mg, 73% yield). <sup>1</sup>H NMR (400 MHz, CDCl<sub>3</sub>) δ 7.52 – 7.46 (m, 2H), 7.40 – 7.31 (m, 3H), 7.28 (d, *J* = 7.9 Hz, 1H), 7.18 – 7.09 (m, 3H), 3.52 (d, *J* = 13.0 Hz, 1H), 3.33 (d, *J* = 13.0 Hz, 1H), 2.90 (s, 1H), 2.39 (s, 3H), 1.66 (s, 3H); <sup>13</sup>C NMR (101 MHz, CDCl<sub>3</sub>) δ 146.3, 138.3, 135.6, 130.2, 129.8, 128.3, 127.1, 126.6, 126.4, 124.8, 74.0, 48.9, 29.5, 20.7.

**HRMS** (ESI) *m/z* calcd. for C<sub>16</sub>H<sub>18</sub>OSNa [M+Na]<sup>+</sup> : 281.0971, found: 281.0971.

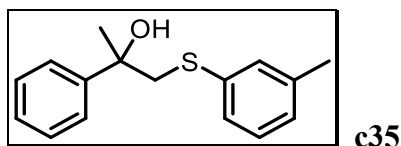

Purification by column chromatography on silica gel (hexane/ethyl acetate = 10/1, v/v) afforded **c35** as a colorless oil (38.7 mg, 75% yield). <sup>1</sup>H NMR (400 MHz, CDCl<sub>3</sub>) δ 7.52 – 7.45 (m, 2H), 7.37 (t, *J* = 4.3 Hz, 2H), 7.31 – 7.24 (m, 1H), 7.21 – 7.12 (m, 3H), 7.02 (d, *J* = 1.0 Hz, 1H), 3.56 (d, *J* = 13.3 Hz, 1H), 3.38 (d, *J* = 13.3 Hz, 1H), 2.99 (s, 1H), 2.32 (s, 3H), 1.66 (s, 3H); <sup>13</sup>C NMR (101 MHz, CDCl<sub>3</sub>) δ 146.3, 138.7, 136.2, 130.7, 128.8, 128.3, 127.4, 127.1, 124.9, 74.0, 49.6, 29.4, 21.3.

**HRMS** (ESI) *m/z* calcd. for C<sub>16</sub>H<sub>18</sub>OSNa [M+Na]<sup>+</sup> : 281.0971, found: 281.0971

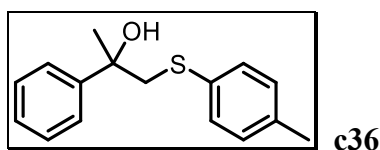

Purification by column chromatography on silica gel (hexane/ethyl acetate = 10/1, v/v)

afforded **c36** as a brown oil (36.6 mg, 71% yield).  $^1\text{H NMR}$  (400 MHz,  $\text{CDCl}_3$ )  $\delta$  7.49 (d,  $J = 7.8$  Hz, 2H), 7.37 (t,  $J = 7.5$  Hz, 2H), 7.29 (d,  $J = 8.1$  Hz, 3H), 7.09 (d,  $J = 7.9$  Hz, 2H), 3.55 (d,  $J = 13.3$  Hz, 1H), 3.35 (d,  $J = 13.3$  Hz, 1H), 2.86 (s, 1H), 2.34 (s, 3H), 1.64 (s, 3H);  $^{13}\text{C NMR}$  (101 MHz,  $\text{CDCl}_3$ )  $\delta$  146.3, 136.6, 132.9, 130.6, 129.8, 128.3, 127.1, 124.9, 74.0, 50.3, 29.4, 21.0.

**HRMS** (ESI)  $m/z$  calcd. for  $\text{C}_{16}\text{H}_{18}\text{OSNa}$   $[\text{M}+\text{Na}]^+$  : 281.0971, found: 281.0969.

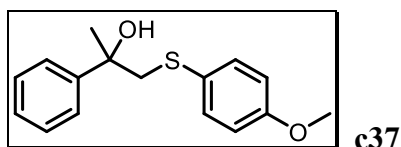

Purification by column chromatography on silica gel (hexane/ethyl acetate = 10/1, v/v) afforded **c37** as a yellow oil (36.2 mg, 66% yield).  $^1\text{H NMR}$  (400 MHz,  $\text{CDCl}_3$ )  $\delta$  7.49 – 7.38 (m, 2H), 7.38 – 7.21 (m, 5H), 6.79 (d,  $J = 8.8$  Hz, 2H), 3.79 (s, 3H), 3.49 (d,  $J = 13.3$  Hz, 1H), 3.27 (d,  $J = 13.3$  Hz, 1H), 3.01 (s, 1H), 1.60 (s, 3H);  $^{13}\text{C NMR}$  (101 MHz,  $\text{CDCl}_3$ )  $\delta$  159.0, 146.3, 133.4, 128.2, 127.0, 126.8, 124.8, 114.6, 74.0, 55.4, 51.5, 29.4.

**HRMS** (ESI)  $m/z$  calcd. for  $\text{C}_{16}\text{H}_{18}\text{O}_2\text{SNa}$   $[\text{M}+\text{Na}]^+$  : 297.0920, found: 297.0918.

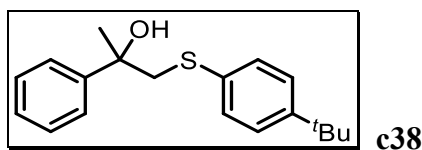

Purification by column chromatography on silica gel (hexane/ethyl acetate = 10/1, v/v) afforded **c38** as a colorless oil (39.0 mg, 65% yield).  $^1\text{H NMR}$  (400 MHz,  $\text{CDCl}_3$ )  $\delta$  7.51 – 7.45 (m, 2H), 7.38 – 7.33 (m, 2H), 7.32 – 7.29 (m, 4H), 7.27 (dd,  $J = 5.7, 3.5$  Hz, 1H), 3.59 (d,  $J = 13.3$  Hz, 1H), 3.37 (d,  $J = 13.3$  Hz, 1H), 3.02 (s, 1H), 1.66 (s, 3H), 1.34 (s, 9H);  $^{13}\text{C NMR}$  (101 MHz,  $\text{CDCl}_3$ )  $\delta$  149.8, 146.3, 132.8, 130.3, 128.3, 127.1, 126.1, 124.9, 74.0, 50.1, 34.5, 31.3, 29.5.

**HRMS** (ESI)  $m/z$  calcd. for  $\text{C}_{19}\text{H}_{24}\text{OSNa}$   $[\text{M}+\text{Na}]^+$  : 323.1440, found: 323.1136.

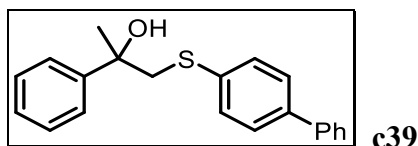

Purification by column chromatography on silica gel (hexane/ethyl acetate = 10/1, v/v) afforded **c39** as a yellow oil (35.2 mg, 55% yield).  $^1\text{H NMR}$  (400 MHz,  $\text{CDCl}_3$ )  $\delta$  7.61 – 7.55 (m, 2H), 7.52 – 7.46 (m, 5H), 7.43 (ddd,  $J = 8.6, 3.8, 2.1$  Hz, 3H), 7.40 – 7.33

(m, 3H), 7.29 (tt,  $J = 5.3, 1.2$  Hz, 1H), 3.61 (d,  $J = 13.3$  Hz, 1H), 3.42 (d,  $J = 13.3$  Hz, 1H), 2.95 (s, 1H), 1.68 (s, 3H);  $^{13}\text{C NMR}$  (101 MHz,  $\text{CDCl}_3$ )  $\delta$  146.2, 140.3, 139.4, 135.6, 130.4, 128.8, 128.3, 127.6, 127.4, 127.1, 126.9, 124.9, 74.0, 49.6, 29.5.

**HRMS** (ESI)  $m/z$  calcd. for  $\text{C}_{21}\text{H}_{20}\text{OSNa}$   $[\text{M}+\text{Na}]^+$  : 343.1127, found: 343.1122.

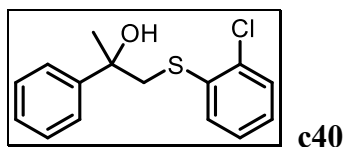

Purification by column chromatography on silica gel (hexane/ethyl acetate = 10/1, v/v) afforded **c40** as a colorless oil (45.0 mg, 81% yield).  $^1\text{H NMR}$  (400 MHz,  $\text{CD}_3\text{CN}$ )  $\delta$  7.40 (d,  $J = 7.7$  Hz, 2H), 7.34 – 7.20 (m, 4H), 7.21 – 7.14 (m, 1H), 7.05 (pd,  $J = 7.3, 1.6$  Hz, 2H), 3.49 (d,  $J = 13.1$  Hz, 1H), 3.26 (d,  $J = 13.1$  Hz, 1H), 2.85 (s, 1H), 1.59 (s, 3H);  $^{13}\text{C NMR}$  (101 MHz,  $\text{CD}_3\text{CN}$ )  $\delta$  140.7, 130.1, 129.5, 125.6, 124.5, 123.0, 122.2, 121.9, 121.9, 119.5, 68.7, 43.1, 24.2.

**HRMS** (ESI)  $m/z$  calcd. for  $\text{C}_{15}\text{H}_{15}\text{ClOSNa}$   $[\text{M}+\text{Na}]^+$  : 301.0424, found: 301.0419.

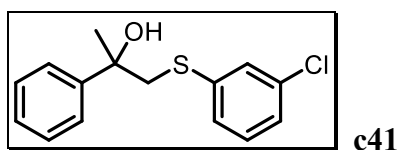

Purification by column chromatography on silica gel (hexane/ethyl acetate = 10/1, v/v) afforded **c41** as a colorless oil (50.0 mg, 90% yield).  $^1\text{H NMR}$  (400 MHz,  $\text{CDCl}_3$ )  $\delta$  7.42 (dd,  $J = 8.1, 1.0$  Hz, 2H), 7.34 – 7.27 (m, 2H), 7.27 – 7.20 (m, 2H), 7.18 – 7.12 (m, 1H), 7.12 – 7.07 (m, 2H), 3.50 (d,  $J = 13.3$  Hz, 1H), 3.31 (d,  $J = 13.3$  Hz, 1H), 2.82 (s, 1H), 1.62 (s, 3H);  $^{13}\text{C NMR}$  (101 MHz,  $\text{CDCl}_3$ )  $\delta$  145.9, 138.7, 134.6, 129.7, 129.3, 128.3, 127.7, 127.3, 126.4, 124.8, 74.0, 49.1, 29.4.

**HRMS** (ESI)  $m/z$  calcd. for  $\text{C}_{15}\text{H}_{15}\text{ClOSNa}$   $[\text{M}+\text{Na}]^+$  : 301.0424, found: 301.0422.

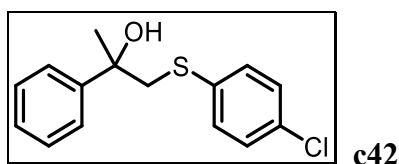

Purification by column chromatography on silica gel (hexane/ethyl acetate = 10/1, v/v) afforded **c42** as a yellow oil (45.6 mg, 82% yield).  $^1\text{H NMR}$  (400 MHz,  $\text{CDCl}_3$ )  $\delta$  7.45 – 7.38 (m, 2H), 7.34 – 7.27 (m, 2H), 7.27 – 7.18 (m, 3H), 7.18 – 7.13 (m, 2H), 3.48 (d,  $J = 13.3$  Hz, 1H), 3.29 (d,  $J = 13.3$  Hz, 1H), 2.85 (s, 1H), 1.60 (s, 3H);  $^{13}\text{C NMR}$  (101



MHz, CDCl<sub>3</sub>)  $\delta$  146.0, 135.1, 132.4, 131.3, 129.0, 128.3, 127.2, 124.8, 74.0, 49.8, 29.4.

**HRMS** (ESI)  $m/z$  calcd. for C<sub>15</sub>H<sub>15</sub>ClOSNa [M+Na]<sup>+</sup> : 301.0424, found: 301.0420.

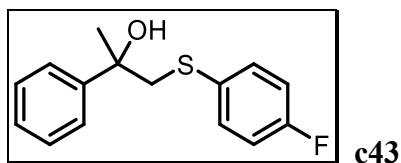

Purification by column chromatography on silica gel (hexane/ethyl acetate = 10/1, v/v) afforded **c43** as a yellow oil (45.6 mg, 87% yield). **<sup>1</sup>H NMR** (400 MHz, CDCl<sub>3</sub>)  $\delta$  7.45 (dd,  $J$  = 8.1, 1.0 Hz, 2H), 7.37 – 7.23 (m, 5H), 6.98 – 6.88 (m, 2H), 3.52 (d,  $J$  = 13.3 Hz, 1H), 3.34 – 3.26 (m, 1H), 2.98 (s, 1H), 1.63 (s, 3H); **<sup>13</sup>C NMR** (101 MHz, CDCl<sub>3</sub>)  $\delta$  161.8 (d,  $J$  = 247.7 Hz), 146.06, 132.8 (d,  $J$  = 8.1 Hz), 131.4 (d,  $J$  = 3.4 Hz), 128.29, 127.14, 124.86, 116.0 (d,  $J$  = 22.0 Hz), 74.04, 50.78, 29.41; **<sup>19</sup>F NMR** (376 MHz, CDCl<sub>3</sub>)  $\delta$  -115.05.

**HRMS** (ESI)  $m/z$  calcd. for C<sub>15</sub>H<sub>15</sub>FOSNa [M+Na]<sup>+</sup> : 285.0720, found: 285.0721.

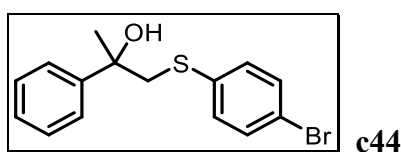

Purification by column chromatography on silica gel (hexane/ethyl acetate = 10/1, v/v) afforded **c44** as a yellow oil (60.0 mg, 93% yield). **<sup>1</sup>H NMR** (400 MHz, CDCl<sub>3</sub>)  $\delta$  7.49 – 7.43 (m, 2H), 7.41 – 7.32 (m, 4H), 7.31 – 7.24 (m, 1H), 7.23 – 7.15 (m, 2H), 3.52 (d,  $J$  = 13.3 Hz, 1H), 3.33 (d,  $J$  = 13.3 Hz, 1H), 2.87 (s, 1H), 1.65 (s, 3H); **<sup>13</sup>C NMR** (101 MHz, CDCl<sub>3</sub>)  $\delta$  146.0, 135.8, 131.9, 131.5, 128.3, 127.2, 124.8, 120.3, 74.0, 49.6, 29.4.

**HRMS** (ESI)  $m/z$  calcd. for C<sub>15</sub>H<sub>15</sub>BrOSNa [M+Na]<sup>+</sup> : 344.9919, found: 344.9918.

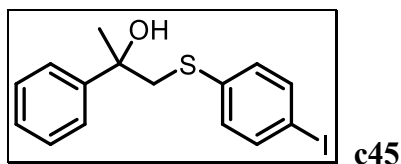

Purification by column chromatography on silica gel (hexane/ethyl acetate = 10/1, v/v) afforded **c45** as a colorless oil (37.0 mg, 50% yield). **<sup>1</sup>H NMR** (400 MHz, CDCl<sub>3</sub>)  $\delta$  7.57 – 7.51 (m, 2H), 7.45 (dt,  $J$  = 3.4, 2.2 Hz, 2H), 7.38 – 7.31 (m, 2H), 7.30 – 7.25 (m, 1H), 7.08 – 7.02 (m, 2H), 3.52 (d,  $J$  = 13.3 Hz, 1H), 3.33 (d,  $J$  = 13.3 Hz, 1H), 2.80 (s, 1H), 1.64 (s, 3H); **<sup>13</sup>C NMR** (101 MHz, CDCl<sub>3</sub>)  $\delta$  146.0, 137.8, 136.7, 131.5, 128.4, 127.2, 124.8, 91.2, 74.0, 49.3, 29.4.

**HRMS** (ESI)  $m/z$  calcd. for  $C_{15}H_{15}IOSNa$   $[M+Na]^+$  : 392.9780, found: 392.9779.

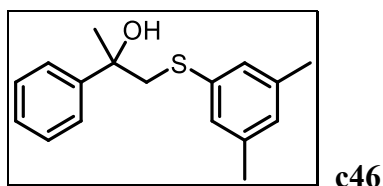

Purification by column chromatography on silica gel (hexane/ethyl acetate = 10/1, v/v) afforded **c46** as a colorless oil (33.2 mg, 61% yield).  **$^1H$  NMR** (400 MHz,  $CDCl_3$ )  $\delta$  7.49 (dd,  $J = 8.2, 1.0$  Hz, 2H), 7.37 (dd,  $J = 10.3, 4.8$  Hz, 2H), 7.28 (ddd,  $J = 7.2, 5.7, 1.2$  Hz, 1H), 6.98 (s, 2H), 6.83 (s, 1H), 3.56 (d,  $J = 13.2$  Hz, 1H), 3.37 (d,  $J = 13.2$  Hz, 1H), 3.01 (s, 1H), 2.28 (s, 6H), 1.65 (s, 3H);  **$^{13}C$  NMR** (101 MHz,  $CDCl_3$ )  $\delta$  146.3, 138.58, 135.85, 128.42, 128.23, 127.83, 127.07, 124.88, 73.97, 49.63, 29.45, 21.20.

**HRMS** (ESI)  $m/z$  calcd. for  $C_{17}H_{20}OSNa$   $[M+Na]^+$  : 295.1127, found: 295.1126.

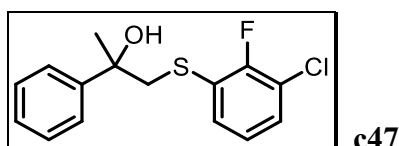

Purification by column chromatography on silica gel (hexane/ethyl acetate = 10/1, v/v) afforded **c47** as a pale-yellow oil (43.8 mg, 74% yield).  **$^1H$  NMR** (400 MHz,  $CDCl_3$ )  $\delta$  7.42 (dt,  $J = 3.2, 2.0$  Hz, 2H), 7.33 – 7.27 (m, 2H), 7.25 – 7.18 (m, 3H), 6.92 (td,  $J = 8.0, 1.2$  Hz, 1H), 3.59 (d,  $J = 13.4$  Hz, 1H), 3.29 (d,  $J = 13.4$  Hz, 1H), 2.94 (s, 1H), 1.65 (s, 3H);  **$^{13}C$  NMR** (101 MHz,  $CDCl_3$ )  $\delta$  157.0 (d,  $J = 247.7$  Hz), 145.6, 131.2, 129.5, 128.2, 127.2, 125.0 (d,  $J = 17.4$  Hz), 124.8, 124.5 (d,  $J = 5.0$  Hz), 121.5 (d,  $J = 19.1$  Hz), 74.0, 48.7, 29.4;  **$^{19}F$  NMR** (376 MHz,  $CDCl_3$ )  $\delta$  -109.47.

**HRMS** (ESI)  $m/z$  calcd. for  $C_{15}H_{14}ClFOSNa$   $[M+Na]^+$  : 319.0330, found: 319.0329.

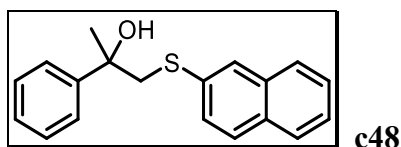

Purification by column chromatography on silica gel (hexane/ethyl acetate = 10/1, v/v) afforded **c48** as a yellow oil (41.2 mg, 70% yield).  **$^1H$  NMR** (400 MHz,  $CDCl_3$ )  $\delta$  7.82 – 7.76 (m, 2H), 7.76 – 7.68 (m, 2H), 7.54 – 7.41 (m, 5H), 7.38 – 7.31 (m, 2H), 7.26 (ddt,  $J = 6.5, 5.2, 1.3$  Hz, 1H), 3.65 (d,  $J = 13.3$  Hz, 1H), 3.48 (d,  $J = 13.3$  Hz, 1H), 2.94 (s, 1H), 1.68 (s, 3H);  **$^{13}C$  NMR** (101 MHz,  $CDCl_3$ )  $\delta$  146.2, 133.9, 133.7, 131.9, 128.5,

128.3, 128.1, 127.8, 127.7, 127.2, 126.6, 125.9, 124.9, 74.1, 49.4, 29.4.

**HRMS** (ESI)  $m/z$  calcd. for  $C_{19}H_{18}OSNa$   $[M+Na]^+$  : 317.0971, found: 317.0968.

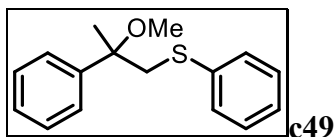

Purification by column chromatography on silica gel (hexane/ethyl acetate = 20/1, v/v) afforded **c49** as a colorless oil (48.0 mg, 93% yield).  **$^1H$  NMR** (500 MHz,  $CDCl_3$ )  $\delta$  7.50 (dd,  $J = 8.2, 1.0$  Hz, 2H), 7.42 (dd,  $J = 10.4, 4.9$  Hz, 2H), 7.33 (dd,  $J = 10.1, 4.2$  Hz, 3H), 7.27 (dd,  $J = 10.7, 5.1$  Hz, 2H), 7.18 (dd,  $J = 10.5, 4.2$  Hz, 1H), 3.47 (d,  $J = 12.5$  Hz, 1H), 3.35 (d,  $J = 12.5$  Hz, 1H), 3.20 (s, 3H), 1.78 (s, 3H);  **$^{13}C$  NMR** (126 MHz,  $CDCl_3$ )  $\delta$  143.5, 137.6, 129.3, 128.8, 128.4, 127.6, 126.4, 125.8, 79.1, 50.9, 47.6, 22.5.

**HRMS** (ESI)  $m/z$  calcd. for  $C_{16}H_{18}OSNa$   $[M+Na]^+$  : 281.0971, found: 281.0973.

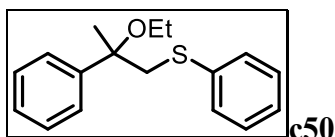

Purification by column chromatography on silica gel (hexane/ethyl acetate = 20/1, v/v) afforded **c50** as a colorless oil (49.0 mg, 90% yield).  **$^1H$  NMR** (500 MHz,  $CDCl_3$ )  $\delta$  7.36 – 7.31 (m, 2H), 7.24 (dd,  $J = 10.3, 4.9$  Hz, 2H), 7.20 – 7.13 (m, 3H), 7.12 – 7.06 (m, 2H), 7.03 – 6.97 (m, 1H), 3.31 (d,  $J = 12.5$  Hz, 1H), 3.25 (dq,  $J = 8.6, 6.9$  Hz, 1H), 3.18 (d,  $J = 12.5$  Hz, 1H), 3.09 (dq,  $J = 8.6, 7.0$  Hz, 1H), 1.62 (d,  $J = 6.8$  Hz, 3H), 1.07 (t,  $J = 7.0$  Hz, 3H);  **$^{13}C$  NMR** (126 MHz,  $CDCl_3$ )  $\delta$  144.3, 137.8, 129.2, 128.8, 128.3, 127.4, 126.2, 125.7, 78.8, 58.4, 47.6, 23.3, 15.7.

**HRMS** (ESI)  $m/z$  calcd. for  $C_{17}H_{20}OSNa$   $[M+Na]^+$  : 295.1127, found: 295.1127.

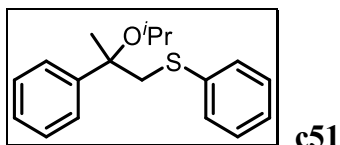

Purification by column chromatography on silica gel (hexane/ethyl acetate = 30/1, v/v) afforded **c51** as a colorless oil (42.9 mg, 75% yield).  **$^1H$  NMR** (500 MHz,  $CDCl_3$ )  $\delta$  7.57 – 7.51 (m, 2H), 7.38 (td,  $J = 8.2, 6.7$  Hz, 2H), 7.31 (ddd,  $J = 9.8, 7.5, 3.3$  Hz, 3H), 7.27 – 7.20 (m, 2H), 7.15 (ddt,  $J = 7.7, 6.5, 3.3$  Hz, 1H), 3.61 (hept,  $J = 6.1$  Hz, 1H), 3.44 (d,  $J = 12.4$  Hz, 1H), 3.32 (d,  $J = 12.4$  Hz, 1H), 1.82 (d,  $J = 6.9$  Hz, 3H), 1.19 (t,  $J$

= 6.4 Hz, 3H), 1.06 (d,  $J$  = 6.1 Hz, 3H);  $^{13}\text{C}$  NMR (126 MHz,  $\text{CDCl}_3$ )  $\delta$  144.4, 137.8, 136.5, 129.2, 128.7, 128.0, 126.9, 125.6, 79.2, 66.0, 48.2, 25.0, 24.5, 23.2.

**HRMS** (ESI)  $m/z$  calcd. for  $\text{C}_{18}\text{H}_{22}\text{OSNa}$   $[\text{M}+\text{Na}]^+$  : 309.1284, found: 309.1284.

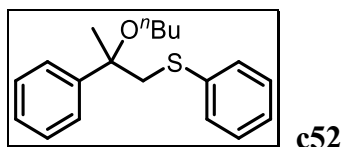

Purification by column chromatography on silica gel (hexane/ethyl acetate = 40/1, v/v) afforded **c52** as a colorless oil (51.6 mg, 86% yield).  $^1\text{H}$  NMR (400 MHz,  $\text{CDCl}_3$ )  $\delta$  7.50 – 7.44 (m, 2H), 7.38 (dd,  $J$  = 10.2, 4.8 Hz, 2H), 7.35 – 7.28 (m, 3H), 7.25 (dd,  $J$  = 10.3, 4.9 Hz, 2H), 7.15 (dd,  $J$  = 8.3, 6.3 Hz, 1H), 3.46 (d,  $J$  = 12.5 Hz, 1H), 3.36 – 3.28 (m, 2H), 3.17 (dt,  $J$  = 8.6, 6.7 Hz, 1H), 1.76 (s, 3H), 1.58 (dt,  $J$  = 14.7, 6.7 Hz, 2H), 1.44 – 1.34 (m, 2H), 0.93 (dd,  $J$  = 9.3, 5.4 Hz, 3H);  $^{13}\text{C}$  NMR (101 MHz,  $\text{CDCl}_3$ )  $\delta$  144.2, 137.8, 129.2, 128.7, 128.2, 127.3, 126.3, 125.6, 78.5, 62.6, 47.6, 32.4, 23.1, 19.4, 14.0.

**HRMS** (ESI)  $m/z$  calcd. for  $\text{C}_{19}\text{H}_{24}\text{OSNa}$   $[\text{M}+\text{Na}]^+$  : 323.1440, found: 323.1440.

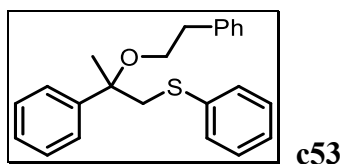

Purification by column chromatography on silica gel (hexane/ethyl acetate = 30/1, v/v) afforded **c53** as a colorless oil (57.1 mg, 82% yield).  $^1\text{H}$  NMR (400 MHz,  $\text{CDCl}_3$ )  $\delta$  7.42 – 7.28 (m, 12H), 7.27 – 7.19 (m, 3H), 3.65 – 3.56 (m, 1H), 3.53 – 3.47 (m, 1H), 3.48 – 3.40 (m, 1H), 3.35 (d,  $J$  = 12.6 Hz, 1H), 2.96 (dd,  $J$  = 14.0, 6.9 Hz, 2H), 1.80 (s, 3H);  $^{13}\text{C}$  NMR (101 MHz,  $\text{CDCl}_3$ )  $\delta$  144.0, 139.2, 137.8, 129.4, 129.2, 128.8, 128.3, 127.4, 126.4, 126.3, 126.2, 125.8, 79.0, 64.2, 47.8, 36.9, 23.0.

**HRMS** (ESI)  $m/z$  calcd. for  $\text{C}_{23}\text{H}_{24}\text{OSNa}$   $[\text{M}+\text{Na}]^+$  : 371.1440, found: 371.1440.

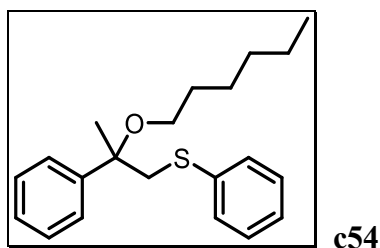

Purification by column chromatography on silica gel (hexane/ethyl acetate = 40/1, v/v)

afforded **c54** as a colorless oil (54.4 mg, 83% yield).  $^1\text{H NMR}$  (400 MHz,  $\text{CDCl}_3$ )  $\delta$  7.48 (dt,  $J = 3.2, 2.1$  Hz, 2H), 7.43 – 7.36 (m, 2H), 7.35 – 7.28 (m, 3H), 7.28 – 7.22 (m, 2H), 7.18 – 7.13 (m, 1H), 3.47 (d,  $J = 12.5$  Hz, 1H), 3.37 – 3.28 (m, 2H), 3.17 (dt,  $J = 8.5, 6.8$  Hz, 1H), 1.77 (d,  $J = 4.5$  Hz, 3H), 1.65 – 1.51 (m, 2H), 1.41 – 1.28 (m, 6H), 0.93 (t,  $J = 7.0$  Hz, 3H);  $^{13}\text{C NMR}$  (101 MHz,  $\text{CDCl}_3$ )  $\delta$  144.3, 137.9, 129.2, 128.7, 128.2, 127.3, 126.3, 125.6, 78.6, 62.9, 47.6, 31.8, 30.2, 25.9, 23.1, 22.7, 14.1.

**HRMS** (ESI)  $m/z$  calcd. for  $\text{C}_{21}\text{H}_{28}\text{OSNa}$   $[\text{M}+\text{Na}]^+$  : 351.1753, found: 351.1754.

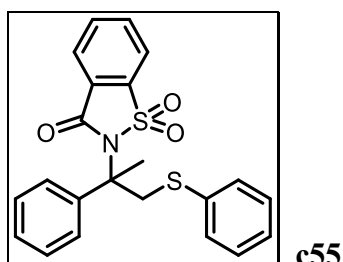

Purification by column chromatography on silica gel (hexane/ethyl acetate = 5/1, v/v) afforded **c55** as a white solid (65.4 mg, 80% yield).  $^1\text{H NMR}$  (400 MHz,  $\text{CDCl}_3$ )  $\delta$  7.89 (dd,  $J = 8.1, 4.3$  Hz, 1H), 7.86 – 7.79 (m, 1H), 7.73 – 7.67 (m, 2H), 7.57 – 7.51 (m, 2H), 7.44 – 7.33 (m, 4H), 7.33 – 7.25 (m, 1H), 7.15 – 7.03 (m, 3H), 4.65 (d,  $J = 13.0$  Hz, 1H), 3.85 (d,  $J = 13.0$  Hz, 1H), 2.25 (s, 3H);  $^{13}\text{C NMR}$  (101 MHz,  $\text{CDCl}_3$ )  $\delta$  158.8, 143.8, 137.9, 135.5, 135.4, 134.7, 133.9, 131.3, 128.6, 127.6, 126.6, 126.3, 125.3, 124.9, 120.2, 67.8, 42.9, 25.1.

**HRMS** (ESI)  $m/z$  calcd. for  $\text{C}_{22}\text{H}_{19}\text{NO}_3\text{S}_2\text{Na}$   $[\text{M}+\text{Na}]^+$  : 432.0699, found: 432.0699.

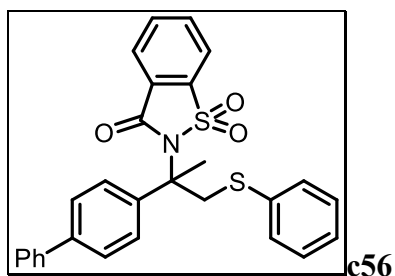

Purification by column chromatography on silica gel (hexane/ethyl acetate = 5/1, v/v) afforded **c56** as a white solid (75.7 mg, 78% yield).  $^1\text{H NMR}$  (400 MHz,  $\text{CDCl}_3$ )  $\delta$  7.94 – 7.84 (m, 2H), 7.74 – 7.68 (m, 2H), 7.62 – 7.54 (m, 6H), 7.47 – 7.39 (m, 4H), 7.35 (t,  $J = 7.3$  Hz, 1H), 7.14 – 7.00 (m, 3H), 4.67 (d,  $J = 13.0$  Hz, 1H), 3.89 (d,  $J = 13.0$  Hz, 1H), 2.28 (s, 3H);  $^{13}\text{C NMR}$  (101 MHz,  $\text{CDCl}_3$ )  $\delta$  158.9, 142.7, 140.5, 140.3, 135.5,

134.7, 134.3, 133.9, 131.4, 128.7, 128.6, 127.4, 127.2, 127.1, 126.6, 125.8, 124.9, 123.6, 120.3, 67.8, 43.1, 25.0.

**HRMS** (ESI)  $m/z$  calcd. for  $C_{28}H_{23}NO_3S_2Na$   $[M+Na]^+$  : 508.1012, found: 508.1014.

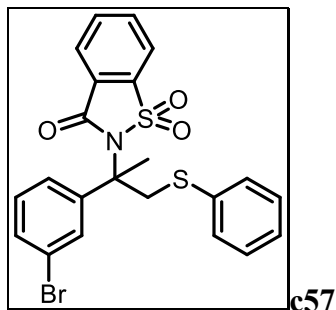

Purification by column chromatography on silica gel (hexane/ethyl acetate = 5/1, v/v) afforded **c57** as a white solid (53.6 mg, 55% yield).  **$^1H$  NMR** (400 MHz,  $CDCl_3$ )  $\delta$  7.89 (d,  $J = 7.7$  Hz, 1H), 7.86 – 7.80 (m, 1H), 7.69 (ddt,  $J = 10.2, 3.6, 1.4$  Hz, 3H), 7.50 – 7.44 (m, 1H), 7.42 – 7.34 (m, 3H), 7.19 (t,  $J = 8.0$  Hz, 1H), 7.14 – 7.01 (m, 3H), 4.57 (d,  $J = 13.1$  Hz, 1H), 3.80 (d,  $J = 13.1$  Hz, 1H), 2.21 (s, 3H);  **$^{13}C$  NMR** (101 MHz,  $CDCl_3$ )  $\delta$  158.8, 146.1, 137.8, 135.2, 134.8, 134.0, 131.4, 130.7, 130.1, 128.6, 128.6, 126.8, 126.2, 124.9, 124.2, 122.7, 120.3, 67.3, 42.8, 24.8.

**HRMS** (ESI)  $m/z$  calcd. for  $C_{22}H_{18}BrNO_3S_2Na$   $[M+Na]^+$  : 509.9804, found: 509.9806.

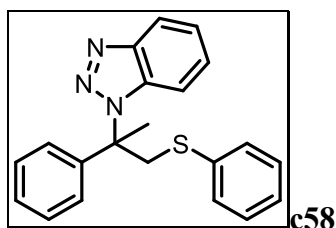

Purification by column chromatography on silica gel (hexane/ethyl acetate = 5/1, v/v) afforded **c58** as a white solid (42.1 mg, 61% yield).  **$^1H$  NMR** (400 MHz,  $CDCl_3$ )  $\delta$  8.01 (dt,  $J = 8.4, 0.8$  Hz, 1H), 7.36 – 7.29 (m, 3H), 7.27 – 7.03 (m, 9H), 6.64 (dd,  $J = 7.6, 0.8$  Hz, 1H), 4.37 (d,  $J = 13.5$  Hz, 1H), 4.15 – 4.09 (m, 1H), 2.27 (s, 3H);  **$^{13}C$  NMR** (101 MHz,  $CDCl_3$ )  $\delta$  146.8, 141.6, 135.9, 132.2, 130.5, 128.8, 128.7, 128.4, 126.6, 126.6, 126.1, 123.6, 120.0, 112.0, 67.8, 47.0, 26.5.

**HRMS** (ESI)  $m/z$  calcd. for  $C_{21}H_{19}N_3SNa$   $[M+Na]^+$  : 368.1192, found: 368.1192.

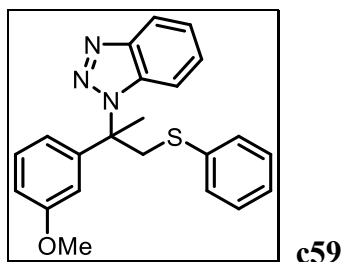

Purification by column chromatography on silica gel (hexane/ethyl acetate = 5/1, v/v) afforded **c59** as a white solid (40.5 mg, 54% yield). **<sup>1</sup>H NMR** (400 MHz, CDCl<sub>3</sub>) δ 8.00 (d, *J* = 8.3 Hz, 1H), 7.26 – 7.20 (m, 2H), 7.19 – 7.03 (m, 6H), 6.84 (dd, *J* = 8.0, 2.2 Hz, 1H), 6.80 – 6.74 (m, 1H), 6.74 – 6.68 (m, 2H), 4.36 (d, *J* = 13.5 Hz, 1H), 4.10 (d, *J* = 13.5 Hz, 1H), 3.69 (s, 3H), 2.24 (s, 3H); **<sup>13</sup>C NMR** (101 MHz, CDCl<sub>3</sub>) δ 159.8, 146.8, 143.2, 135.9, 132.2, 130.6, 129.9, 128.7, 126.7, 126.6, 123.6, 120.0, 118.4, 113.1, 112.7, 112.0, 67.7, 55.3, 46.9, 26.4.

**HRMS** (ESI) *m/z* calcd. for C<sub>22</sub>H<sub>21</sub>N<sub>3</sub>OSNa [M+Na]<sup>+</sup> : 398.1298, found: 398.1298.

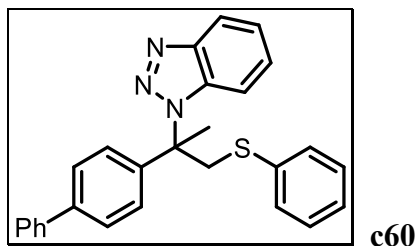

Purification by column chromatography on silica gel (hexane/ethyl acetate = 5/1, v/v) afforded **c60** as a white solid (43.8 mg, 52% yield). **<sup>1</sup>H NMR** (400 MHz, CDCl<sub>3</sub>) δ 8.04 (d, *J* = 8.3 Hz, 1H), 7.61 – 7.56 (m, 2H), 7.55 – 7.50 (m, 2H), 7.46 (dd, *J* = 8.1, 6.9 Hz, 2H), 7.38 (d, *J* = 7.3 Hz, 1H), 7.28 – 7.21 (m, 3H), 7.17 (ddd, *J* = 4.9, 3.9, 2.3 Hz, 3H), 7.14 – 7.07 (m, 3H), 6.75 (d, *J* = 8.4 Hz, 1H), 4.41 (d, *J* = 13.5 Hz, 1H), 4.19 (d, *J* = 13.5 Hz, 1H), 2.31 (s, 3H); **<sup>13</sup>C NMR** (101 MHz, CDCl<sub>3</sub>) δ 146.9, 141.1, 140.4, 140.0, 135.9, 132.3, 130.7, 128.9, 128.7, 127.7, 127.4, 127.0, 126.7, 126.7, 126.6, 123.6, 120.1, 112.1, 67.8, 47.2, 26.4.

**HRMS** (ESI) *m/z* calcd. for C<sub>27</sub>H<sub>23</sub>N<sub>3</sub>SNa [M+Na]<sup>+</sup> : 444.1505, found: 444.1505.

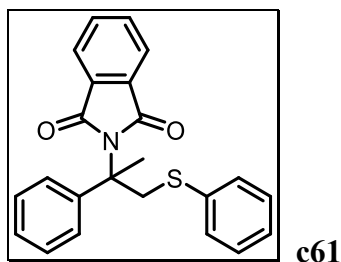

Purification by column chromatography on silica gel (hexane/ethyl acetate = 10/1, v/v) afforded **c61** as a white solid (39.5 mg, 53% yield).  $^1\text{H NMR}$  (400 MHz,  $\text{CDCl}_3$ )  $\delta$  7.72 – 7.62 (m, 4H), 7.39 – 7.30 (m, 6H), 7.30 – 7.24 (m, 1H), 7.10 – 7.04 (m, 2H), 7.03 – 6.96 (m, 1H), 4.61 (d,  $J = 13.4$  Hz, 1H), 3.65 (d,  $J = 13.4$  Hz, 1H), 2.19 (s, 3H);  $^{13}\text{C NMR}$  (101 MHz,  $\text{CDCl}_3$ )  $\delta$  169.2, 145.5, 135.9, 133.8, 131.7, 130.9, 128.7, 128.6, 127.2, 126.4, 124.6, 123.0, 64.9, 44.7, 27.6.

**HRMS** (ESI)  $m/z$  calcd. for  $\text{C}_{23}\text{H}_{19}\text{NO}_2\text{SNa}$   $[\text{M}+\text{Na}]^+$  : 396.1029, found: 396.1028.

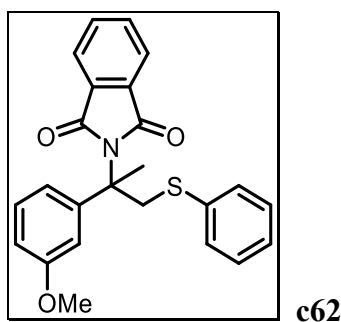

Purification by column chromatography on silica gel (hexane/ethyl acetate = 10/1, v/v) afforded **c62** as a colorless oil (58.8 mg, 73% yield).  $^1\text{H NMR}$  (400 MHz,  $\text{CDCl}_3$ )  $\delta$  7.72 – 7.61 (m, 4H), 7.35 – 7.29 (m, 2H), 7.26 (td,  $J = 7.9, 3.4$  Hz, 1H), 7.07 (dd,  $J = 10.3, 4.7$  Hz, 2H), 7.01 – 6.92 (m, 2H), 6.90 (t,  $J = 2.1$  Hz, 1H), 6.79 (dd,  $J = 8.2, 2.2$  Hz, 1H), 4.60 (d,  $J = 13.4$  Hz, 1H), 3.77 (s, 3H), 3.66 – 3.59 (m, 1H), 2.18 (s, 3H);  $^{13}\text{C NMR}$  (101 MHz,  $\text{CDCl}_3$ )  $\delta$  169.1, 159.7, 147.2, 135.9, 133.8, 131.7, 130.8, 129.6, 128.7, 126.4, 123.0, 117.0, 111.6, 111.4, 64.8, 55.2, 44.6, 27.5.

**HRMS** (ESI)  $m/z$  calcd. for  $\text{C}_{24}\text{H}_{21}\text{NO}_3\text{SNa}$   $[\text{M}+\text{Na}]^+$  : 426.1134, found: 426.1134.

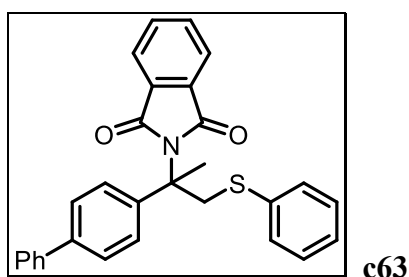



Purification by column chromatography on silica gel (hexane/ethyl acetate = 10/1, v/v) afforded **c64** as a white solid (50.3 mg, 56% yield).  $^1\text{H NMR}$  (400 MHz,  $\text{CDCl}_3$ )  $\delta$  7.74 – 7.64 (m, 4H), 7.60 – 7.55 (m, 4H), 7.44 (ddd,  $J = 8.6, 6.9, 2.1$  Hz, 4H), 7.38 – 7.32 (m, 3H), 7.12 – 7.05 (m, 2H), 7.04 – 6.97 (m, 1H), 4.64 (d,  $J = 13.4$  Hz, 1H), 3.71 (d,  $J = 13.4$  Hz, 1H), 2.24 (s, 3H);  $^{13}\text{C NMR}$  (101 MHz,  $\text{CDCl}_3$ )  $\delta$  169.2, 144.4, 140.5, 140.0, 135.9, 133.8, 131.7, 130.9, 128.8, 128.7, 127.3, 127.3, 127.1, 126.4, 125.1, 123.0, 64.8, 44.8, 27.5.

**HRMS** (ESI)  $m/z$  calcd. for  $\text{C}_{29}\text{H}_{23}\text{NO}_2\text{SNa}$   $[\text{M}+\text{Na}]^+$  : 472.1342, found: 472.1344.

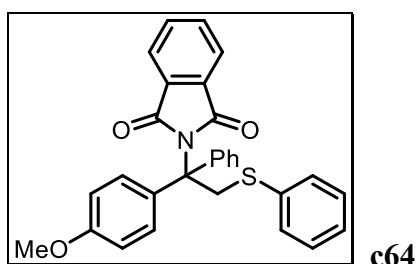

Purification by column chromatography on silica gel (hexane/ethyl acetate = 10/1, v/v) afforded **c63** as a yellow oil (39.1 mg, 42% yield).  $^1\text{H NMR}$  (400 MHz,  $\text{CDCl}_3$ )  $\delta$  7.81 – 7.74 (m, 2H), 7.73 – 7.67 (m, 2H), 7.48 – 7.39 (m, 4H), 7.34 – 7.28 (m, 3H), 7.17 – 7.06 (m, 5H), 6.86 – 6.78 (m, 2H), 4.63 (q,  $J = 12.9$  Hz, 2H), 3.80 (s, 3H);  $^{13}\text{C NMR}$  (101 MHz,  $\text{CDCl}_3$ )  $\delta$  168.8, 158.8, 141.2, 136.8, 134.1, 133.0, 131.8, 130.1, 129.4, 128.6, 127.9, 127.8, 127.5, 126.1, 123.2, 113.1, 69.4, 55.2, 46.4.

**HRMS** (ESI)  $m/z$  calcd. for  $\text{C}_{29}\text{H}_{23}\text{NO}_3\text{SNa}$   $[\text{M}+\text{Na}]^+$  : 488.1291, found: 488.1291.

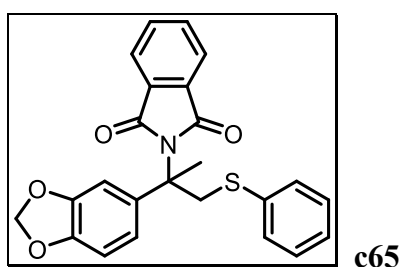

Purification by column chromatography on silica gel (hexane/ethyl acetate = 10/1, v/v) afforded **c65** as a white solid (37.5 mg, 45% yield).  $^1\text{H NMR}$  (400 MHz,  $\text{CDCl}_3$ )  $\delta$  7.73 – 7.62 (m, 4H), 7.31 (dt,  $J = 3.3, 1.9$  Hz, 2H), 7.12 – 7.05 (m, 2H), 7.03 – 6.97 (m, 1H), 6.86 – 6.79 (m, 2H), 6.77 – 6.72 (m, 1H), 5.93 (ddd,  $J = 5.3, 3.6, 1.6$  Hz, 2H), 4.58 –

4.49 (m, 1H), 3.61 (dd,  $J = 13.1, 7.4$  Hz, 1H), 2.14 (s, 3H);  $^{13}\text{C}$  NMR (101 MHz,  $\text{CDCl}_3$ )  $\delta$  169.1, 147.8, 146.5, 139.4, 133.8, 131.7, 130.8, 128.7, 126.4, 122.9, 117.9, 108.0, 105.8, 101.2, 100.0, 64.8, 45.0, 27.3.

**HRMS** (ESI)  $m/z$  calcd. for  $\text{C}_{24}\text{H}_{19}\text{NO}_4\text{SNa}$   $[\text{M}+\text{Na}]^+$  : 440.0928, found: 440.0928.

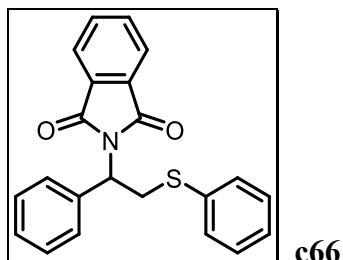

Purification by column chromatography on silica gel (hexane/ethyl acetate = 10/1, v/v) afforded **c66** as a colorless oil (37.3 mg, 52% yield).  $^1\text{H}$  NMR (400 MHz,  $\text{CDCl}_3$ )  $\delta$  7.82 – 7.76 (m, 2H), 7.73 – 7.66 (m, 2H), 7.54 – 7.48 (m, 2H), 7.40 (dt,  $J = 8.0, 1.6$  Hz, 2H), 7.35 – 7.33 (m, 1H), 7.33 – 7.28 (m, 2H), 7.27 – 7.21 (m, 2H), 7.19 – 7.14 (m, 1H), 5.49 (dd,  $J = 11.2, 4.8$  Hz, 1H), 4.32 (dt,  $J = 14.0, 9.4$  Hz, 1H), 3.59 (ddd,  $J = 14.2, 9.5, 4.8$  Hz, 1H);  $^{13}\text{C}$  NMR (101 MHz,  $\text{CDCl}_3$ )  $\delta$  168.2, 138.6, 133.9, 131.8, 131.4, 129.0, 128.7, 128.2, 128.0, 127.1, 125.9, 123.3, 54.7, 36.1.

**HRMS** (ESI)  $m/z$  calcd. for  $\text{C}_{22}\text{H}_{17}\text{NO}_2\text{SNa}$   $[\text{M}+\text{Na}]^+$  : 382.0872, found: 382.0872.

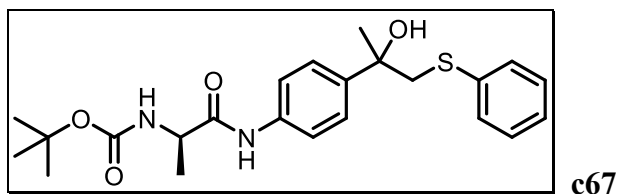

Purification by column chromatography on silica gel (hexane/ethyl acetate = 3/1, v/v) afforded **c67** as a white solid (61.9 mg, 72% yield).  $^1\text{H}$  NMR (400 MHz,  $\text{CDCl}_3$ )  $\delta$  8.88 (s, 1H), 7.48 (d,  $J = 8.5$  Hz, 2H), 7.41 – 7.31 (m, 4H), 7.25 (t,  $J = 7.5$  Hz, 2H), 7.19 (d,  $J = 7.3$  Hz, 1H), 5.48 (s, 1H), 4.43 (s, 1H), 3.49 (dd,  $J = 13.2, 6.0$  Hz, 1H), 3.34 (t,  $J = 11.1$  Hz, 1H), 3.20 (s, 1H), 1.61 (s, 3H), 1.50 – 1.45 (m, 12H);  $^{13}\text{C}$  NMR (101 MHz,  $\text{CDCl}_3$ )  $\delta$  171.4, 156.2, 142.1, 136.9, 136.7, 129.9, 129.0, 126.3, 125.5, 119.7, 80.5, 73.9, 50.8, 49.4, 29.2, 28.4, 18.0.

**HRMS** (ESI)  $m/z$  calcd. for  $\text{C}_{23}\text{H}_{30}\text{N}_2\text{O}_4\text{SNa}$   $[\text{M}+\text{Na}]^+$  : 453.1818, found: 453.1809.

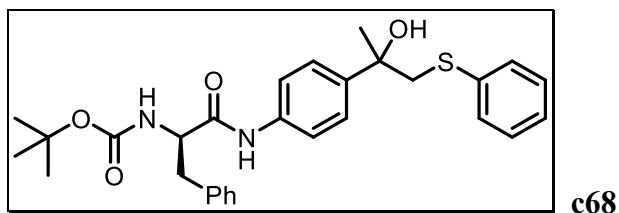

**c68**

Purification by column chromatography on silica gel (hexane/ethyl acetate = 3/1, v/v) afforded **c68** as a white solid (68.8 mg, 68% yield).  $^1\text{H NMR}$  (400 MHz,  $\text{CDCl}_3$ )  $\delta$  7.44 – 7.31 (m, 7H), 7.30 – 7.23 (m, 7H), 7.21 – 7.15 (m, 1H), 5.81 (s, 1H), 4.75 (s, 1H), 3.49 (d,  $J = 13.1$  Hz, 1H), 3.43 – 2.98 (m, 4H), 1.62 (s, 3H), 1.43 (s, 9H);  $^{13}\text{C NMR}$  (101 MHz,  $\text{CDCl}_3$ )  $\delta$  170.4, 156.2, 142.3, 136.7, 134.2, 129.9, 129.4, 129.0, 128.7, 126.9, 126.3, 125.5, 123.5, 120.0, 80.5, 73.9, 56.8, 49.4, 38.8, 29.2, 28.4.

**HRMS** (ESI)  $m/z$  calcd. for  $\text{C}_{29}\text{H}_{34}\text{N}_2\text{O}_4\text{SNa}$   $[\text{M}+\text{Na}]^+$  : 529.2132, found: 529.2127.

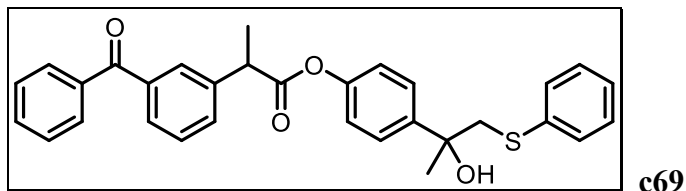

**c69**

Purification by column chromatography on silica gel (hexane/ethyl acetate = 3/1, v/v) afforded **c67** as a white solid (84.3 mg, 85% yield).  $^1\text{H NMR}$  (400 MHz,  $\text{CDCl}_3$ )  $\delta$  8.03 – 7.95 (m, 3H), 7.88 (s, 1H), 7.81 (d,  $J = 7.4$  Hz, 1H), 7.73 (dd,  $J = 10.5, 4.1$  Hz, 1H), 7.64 (d,  $J = 7.2$  Hz, 3H), 7.46 (d,  $J = 7.2$  Hz, 2H), 7.42 – 7.29 (m, 6H), 7.05 (d,  $J = 6.8$  Hz, 1H), 4.25 – 4.14 (m, 1H), 3.63 (d,  $J = 13.4$  Hz, 1H), 3.48 (d,  $J = 13.4$  Hz, 1H), 3.13 (s, 1H), 1.82 (d,  $J = 6.3$  Hz, 3H), 1.74 (s, 3H);  $^{13}\text{C NMR}$  (101 MHz,  $\text{CDCl}_3$ )  $\delta$  196.6, 172.7, 150.9, 148.4, 140.5, 138.3, 137.6, 134.4, 132.7, 131.7, 130.3, 129.4, 129.1, 128.9, 128.5, 126.7, 123.7, 122.6, 120.1, 118.2, 74.0, 49.5, 45.7, 29.5, 18.7.

**HRMS** (ESI)  $m/z$  calcd. for  $\text{C}_{31}\text{H}_{28}\text{O}_4\text{SNa}$   $[\text{M}+\text{Na}]^+$  : 519.1601, found: 519.1600.

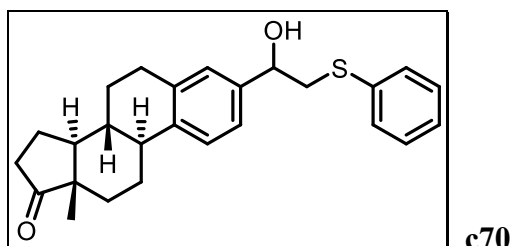

**c70**

Purification by column chromatography on silica gel (hexane/ethyl acetate = 3/1, v/v) afforded **c67** as a white solid (57.6 mg, 71% yield).  $^1\text{H NMR}$  (400 MHz,  $\text{CDCl}_3$ )  $\delta$  7.44

(d,  $J = 7.4$  Hz, 2H), 7.33 (dd,  $J = 12.5, 4.7$  Hz, 3H), 7.27 (d,  $J = 7.2$  Hz, 1H), 7.15 (dd,  $J = 8.1, 6.5$  Hz, 2H), 4.72 (dd,  $J = 9.2, 3.4$  Hz, 1H), 3.35 (dd,  $J = 13.7, 3.7$  Hz, 1H), 3.15 (dd,  $J = 13.7, 9.3$  Hz, 1H), 2.99 (s, 1H), 2.94 (dd,  $J = 8.9, 4.0$  Hz, 2H), 2.59 – 2.42 (m, 2H), 2.32 (dd,  $J = 13.5, 7.1$  Hz, 1H), 2.22 – 2.01 (m, 4H), 1.68 – 1.49 (m, 6H), 0.94 (s, 3H);  $^{13}\text{C NMR}$  (101 MHz,  $\text{CDCl}_3$ )  $\delta$  221.0, 139.7, 136.8, 134.3, 130.1, 129.1, 126.7, 126.5, 125.6, 123.6, 123.4, 71.5, 50.5, 48.0, 44.4, 43.7, 38.1, 35.9, 31.6, 29.5, 26.5, 25.7, 21.6, 13.9.

**HRMS** (ESI)  $m/z$  calcd. for  $\text{C}_{26}\text{H}_{30}\text{O}_2\text{SNa}$   $[\text{M}+\text{Na}]^+$  : 429.1859, found: 429.1858.

### 3. NMR spectra for the products

#### <sup>1</sup>H NMR spectrum of c1

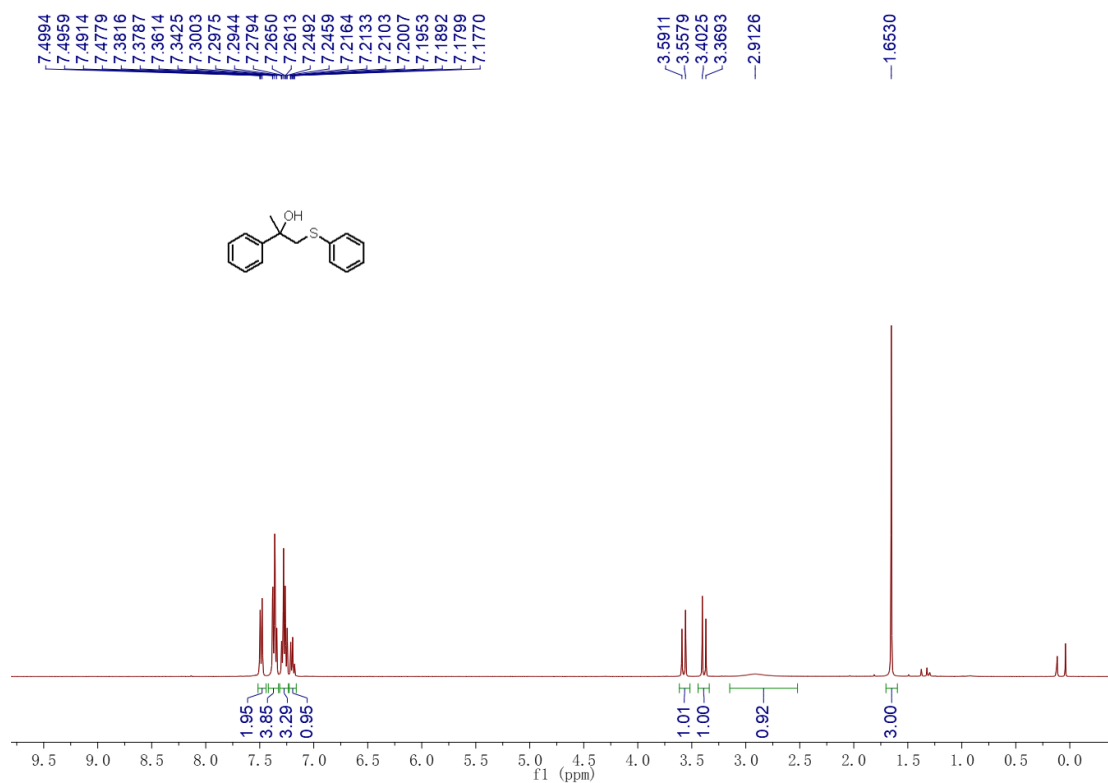

#### <sup>13</sup>C NMR spectrum of c1

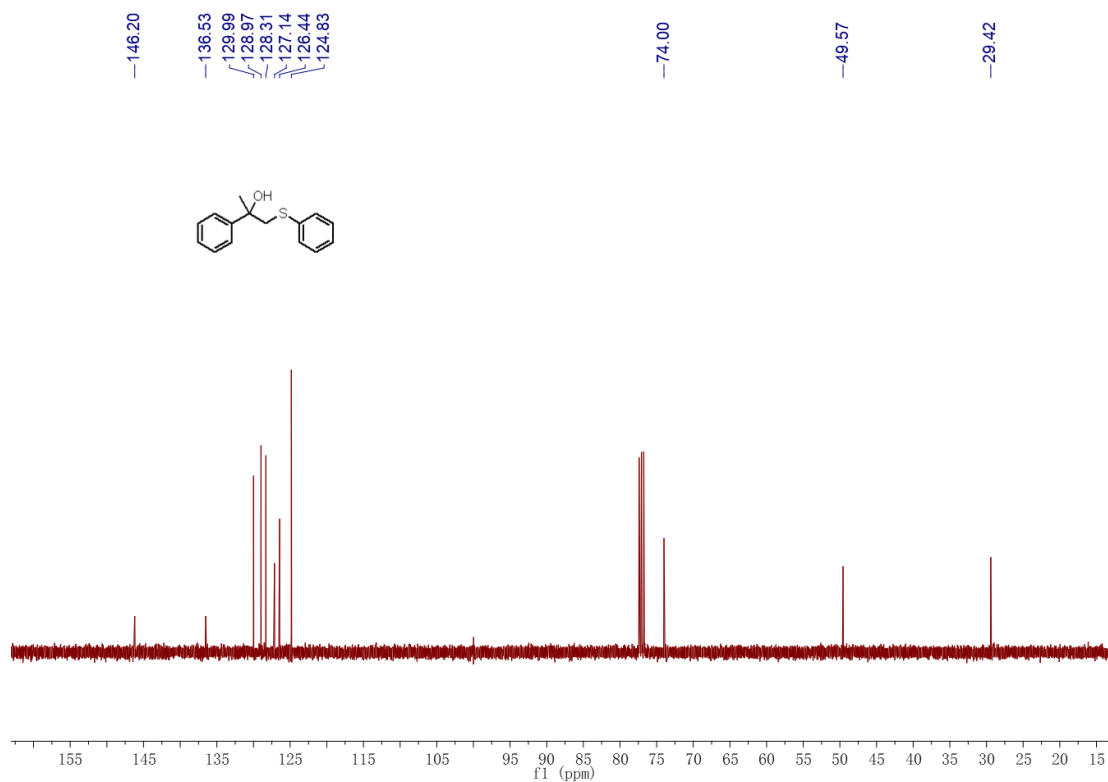

### <sup>1</sup>H NMR spectrum of c2

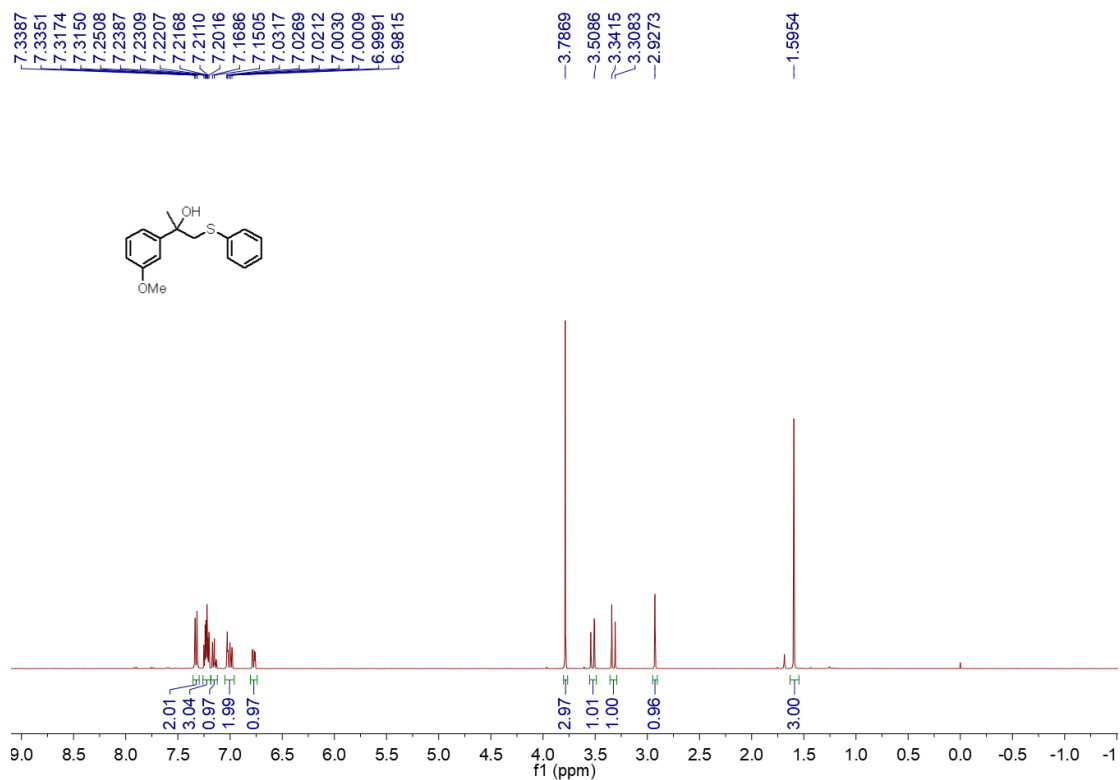

### <sup>13</sup>C NMR spectrum of c2

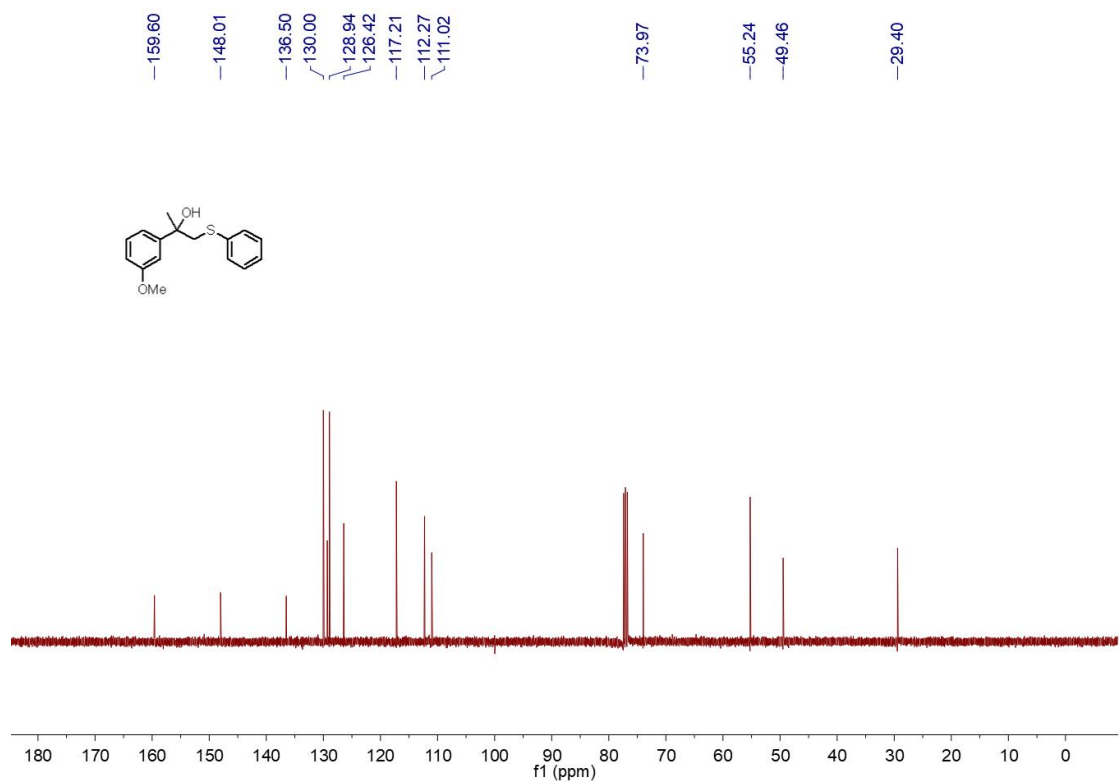

### <sup>1</sup>H NMR spectrum of c3

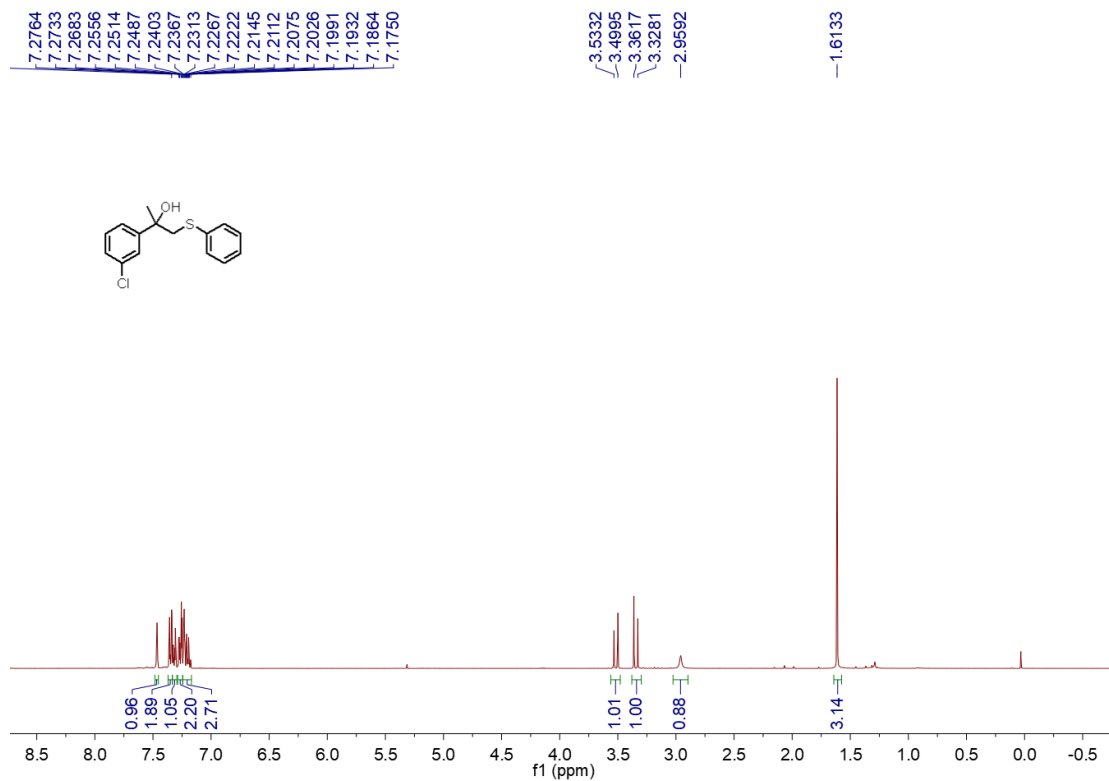

### <sup>13</sup>C NMR spectrum of c3

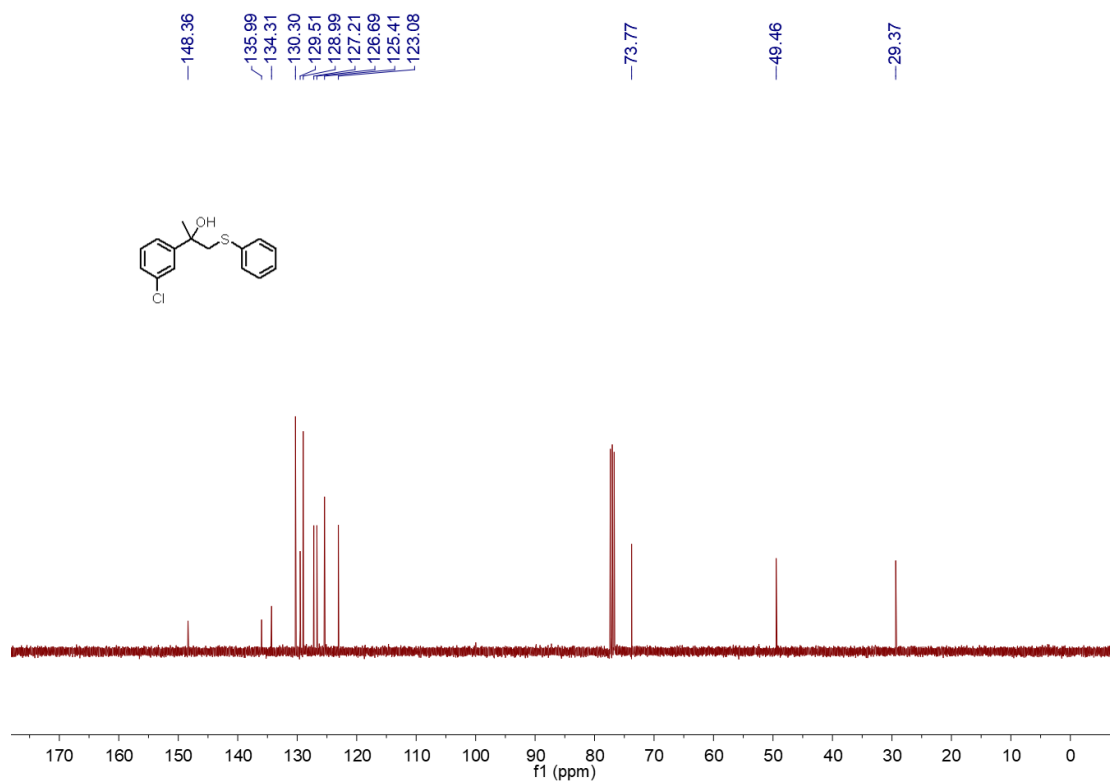

### <sup>1</sup>H NMR spectrum of c4

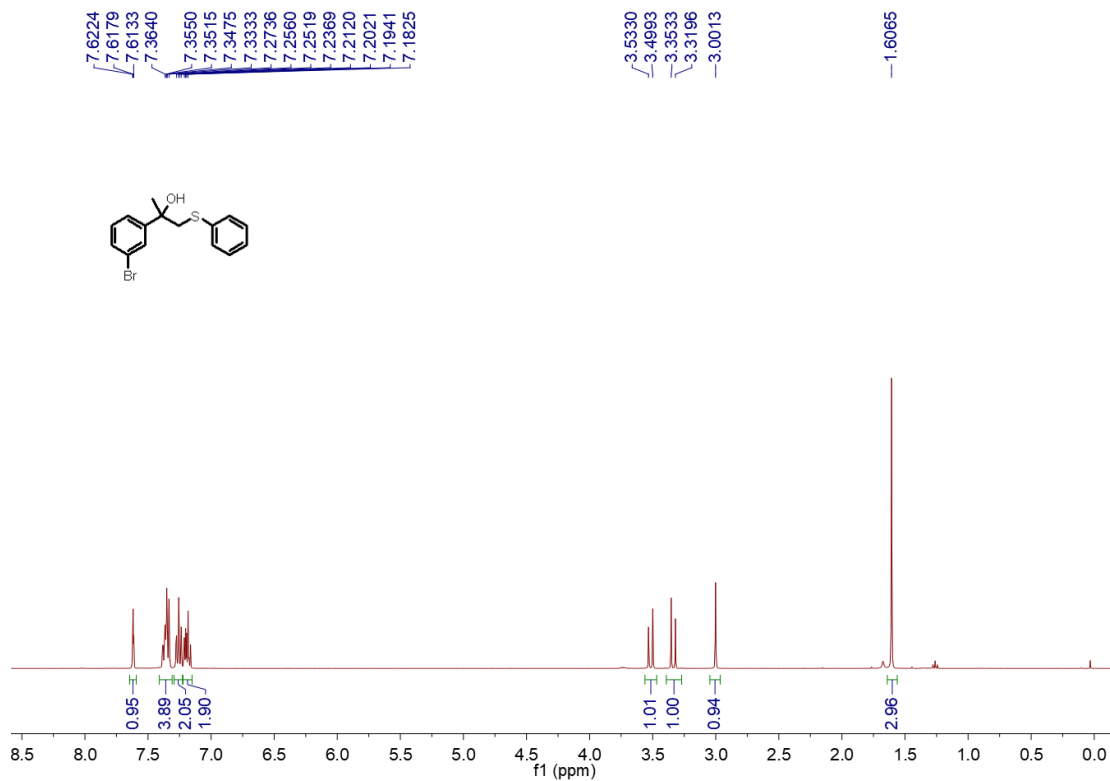

### <sup>13</sup>C NMR spectrum of c4

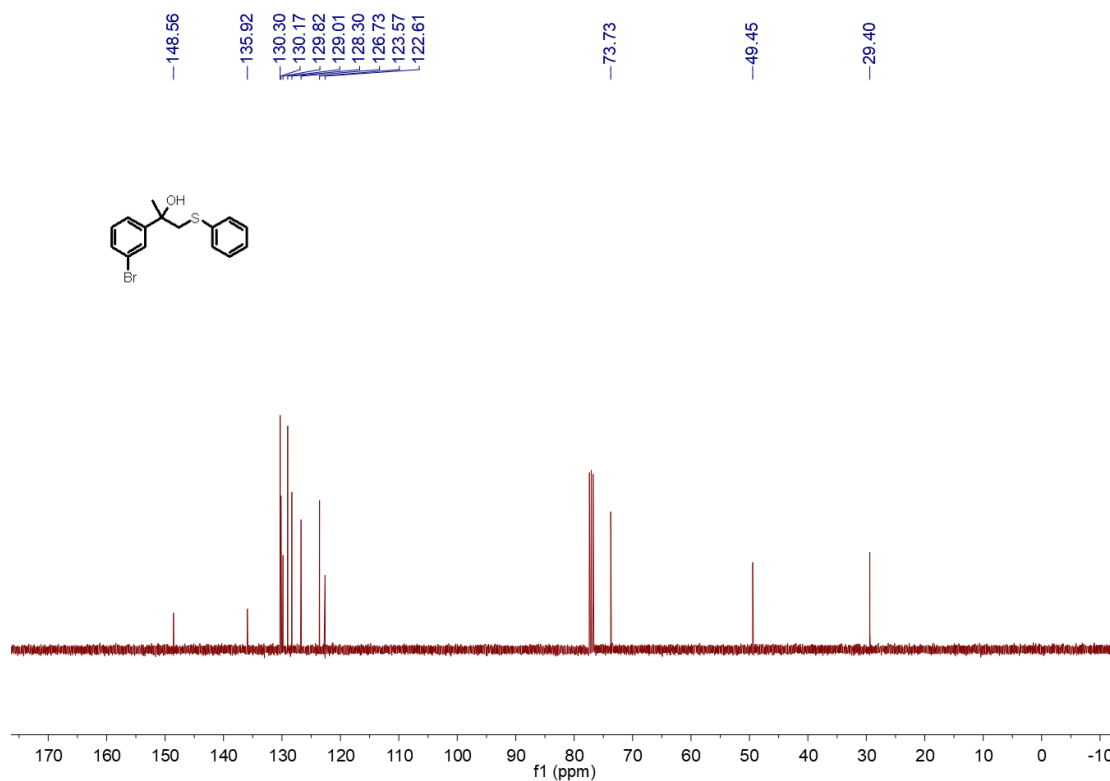



### <sup>1</sup>H NMR spectrum of c5

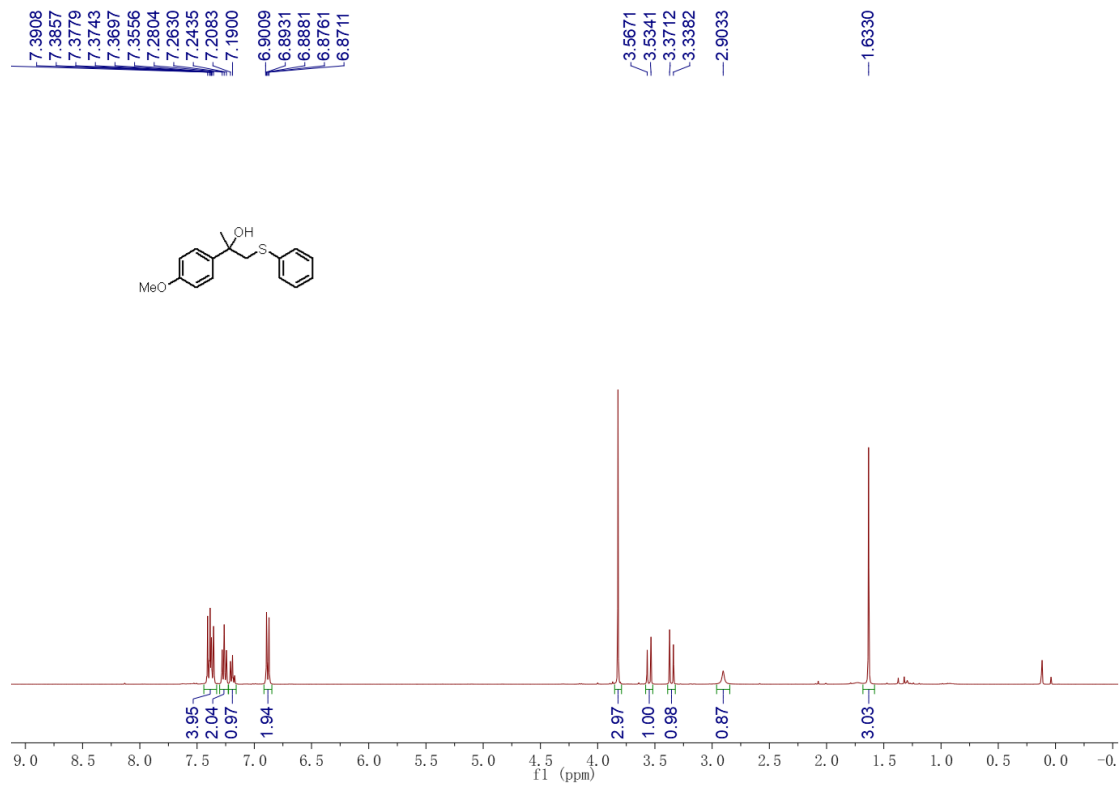

### <sup>13</sup>C NMR spectrum of c5

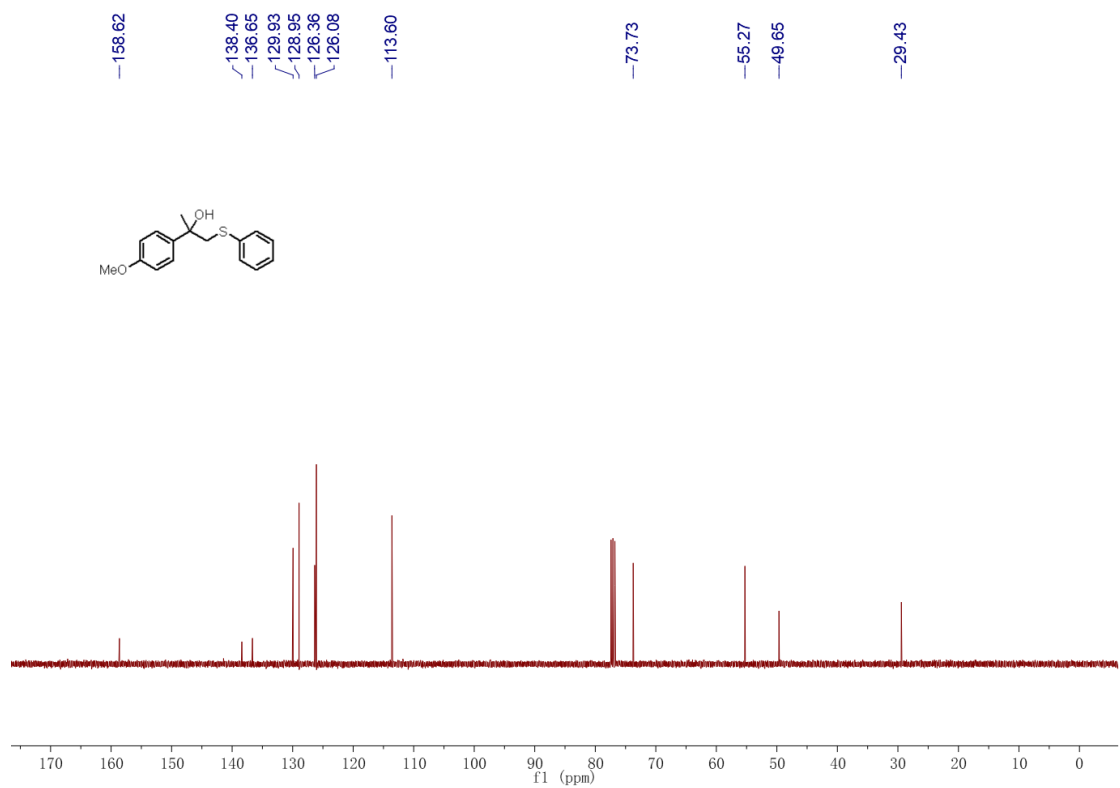

### <sup>1</sup>H NMR spectrum of c6

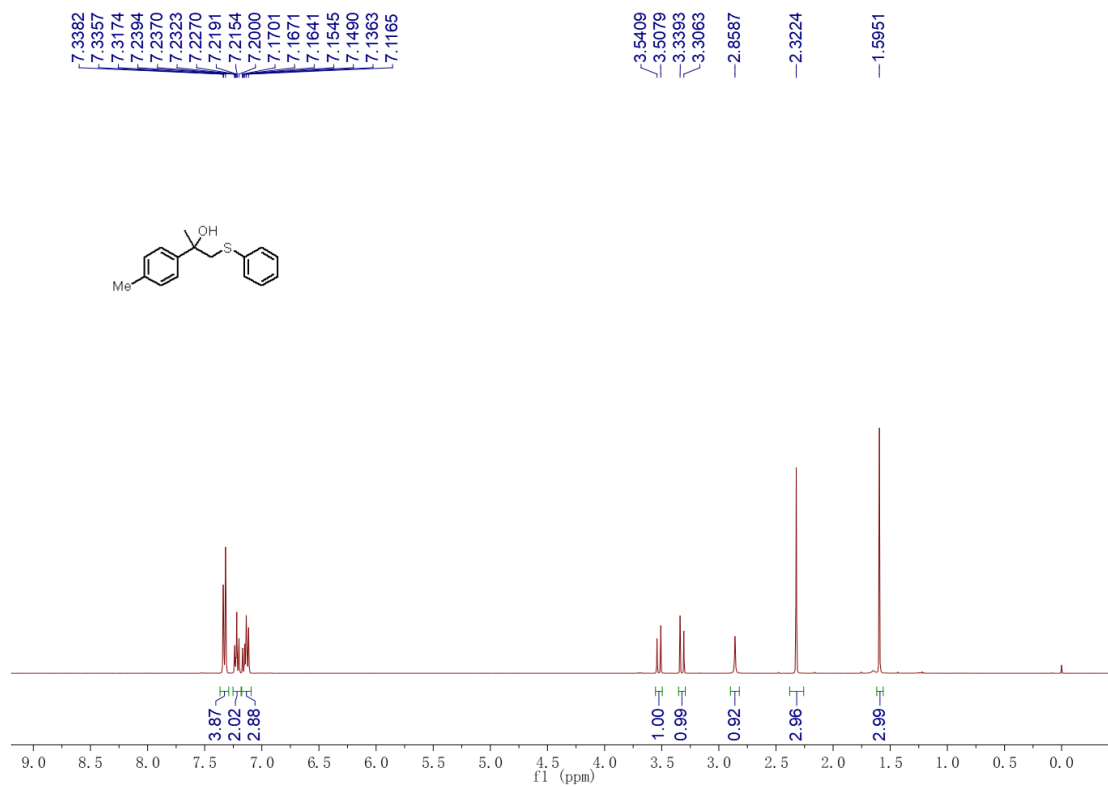

### <sup>13</sup>C NMR spectrum of c6

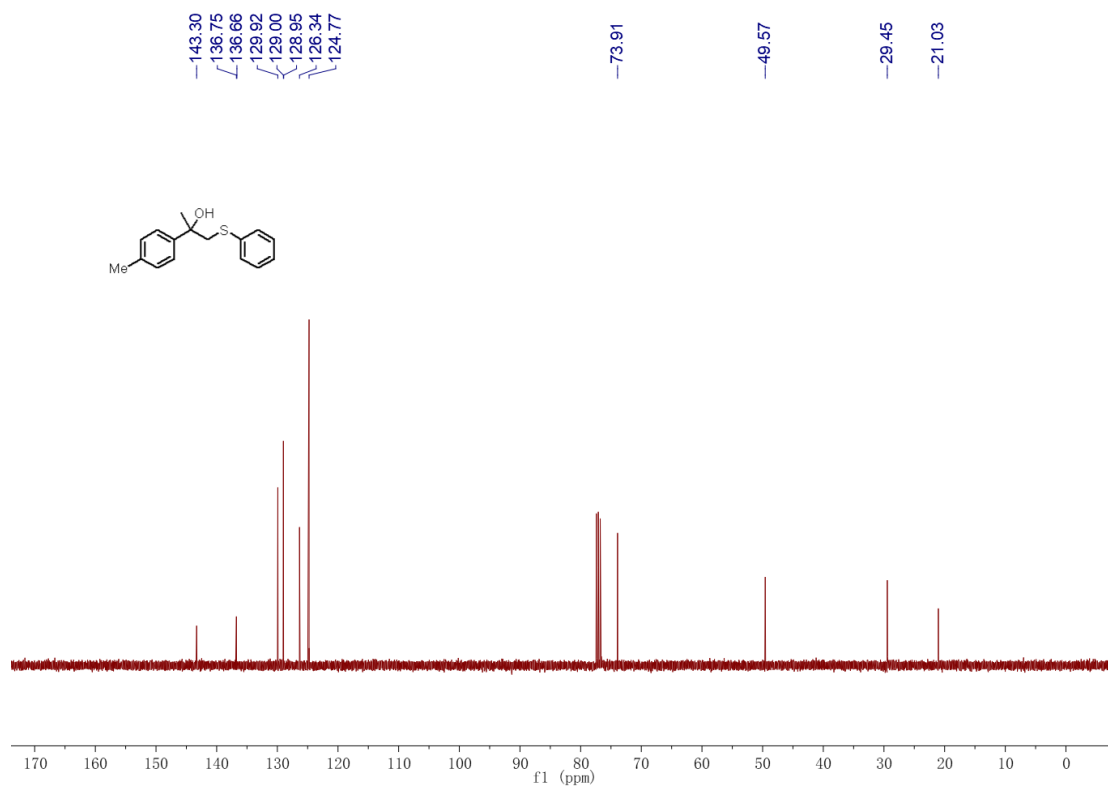

### <sup>1</sup>H NMR spectrum of c7

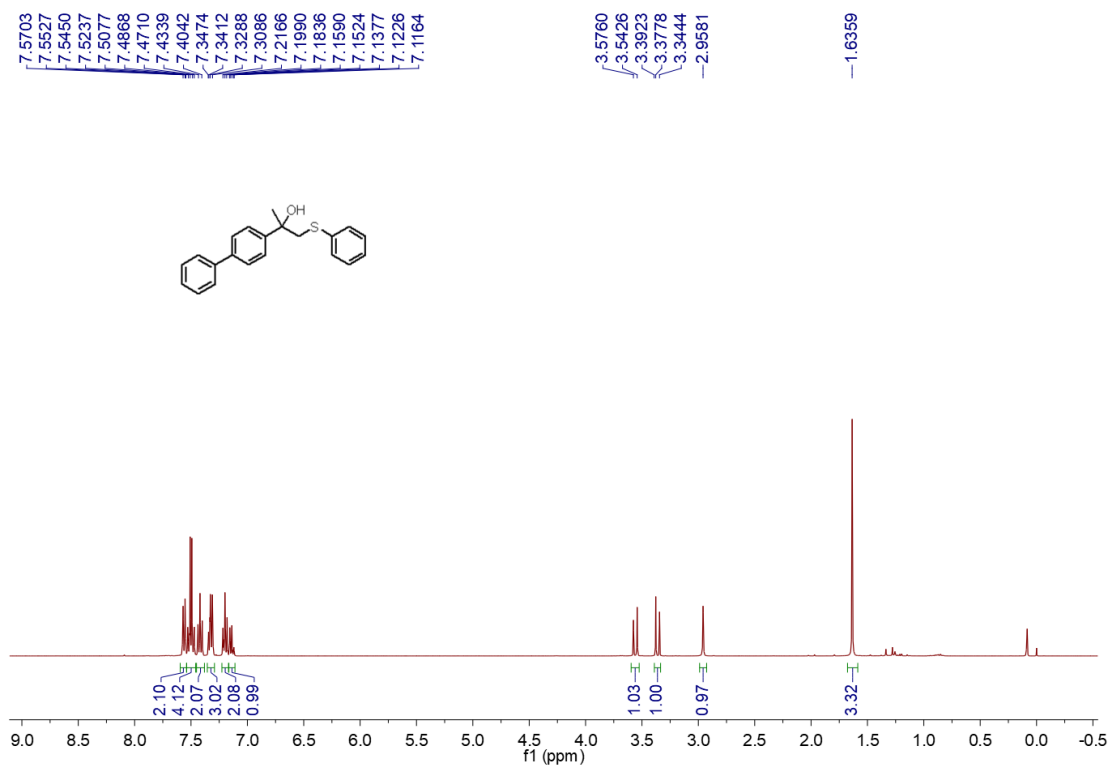

### <sup>13</sup>C NMR spectrum of c7

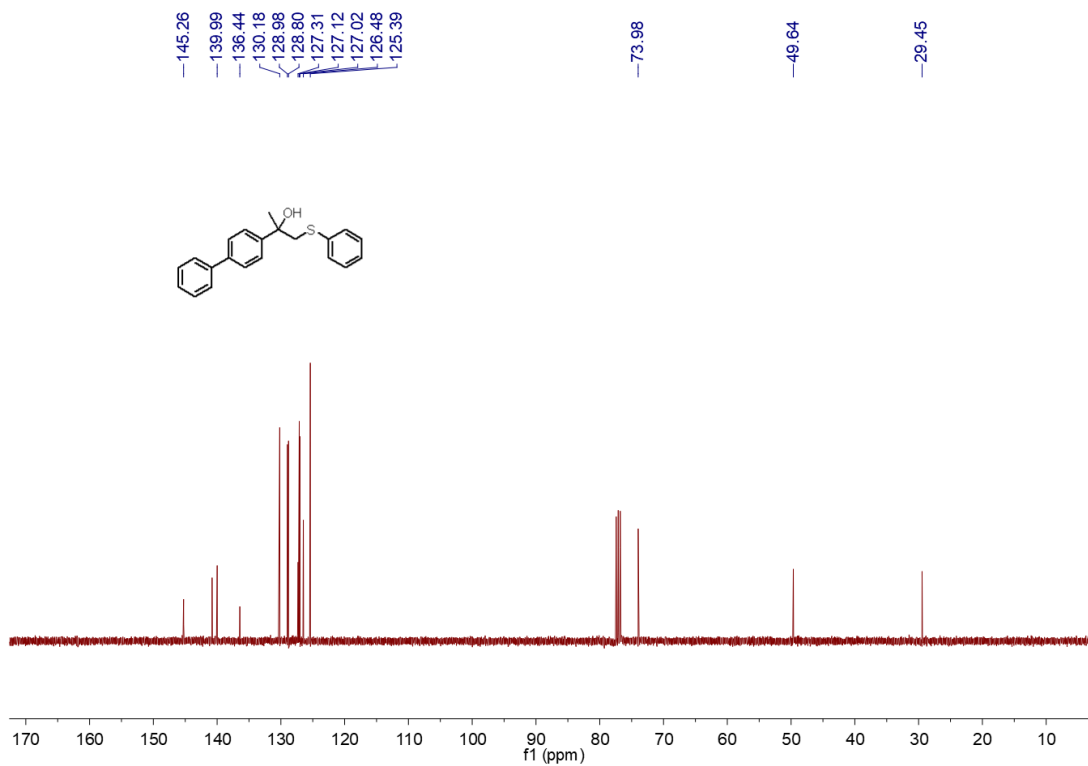

### <sup>1</sup>H NMR spectrum of c8

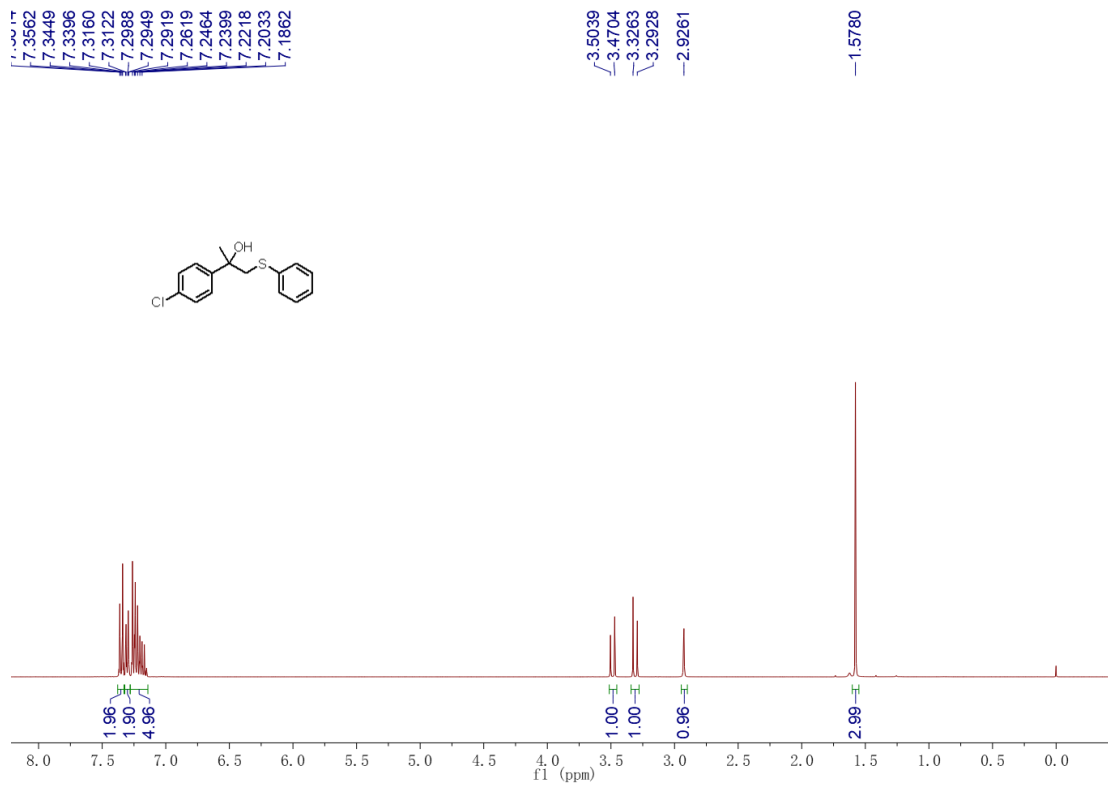

### <sup>13</sup>C NMR spectrum of c8

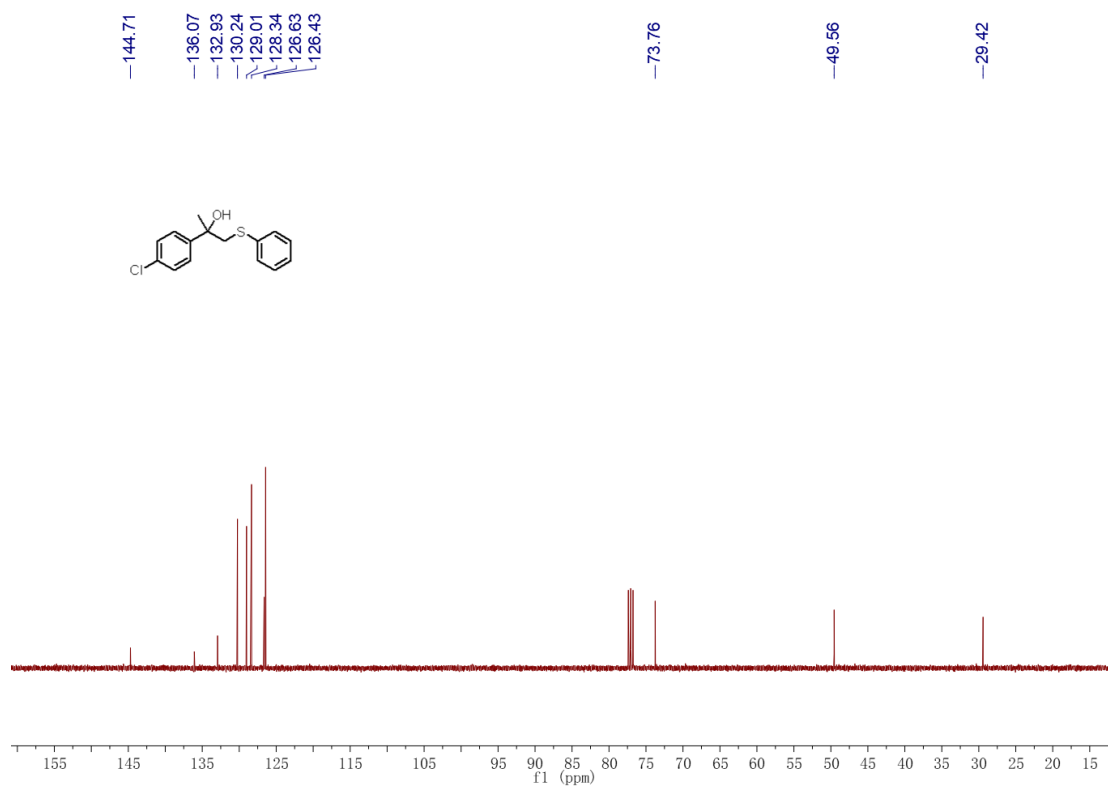

### <sup>1</sup>H NMR spectrum of c9

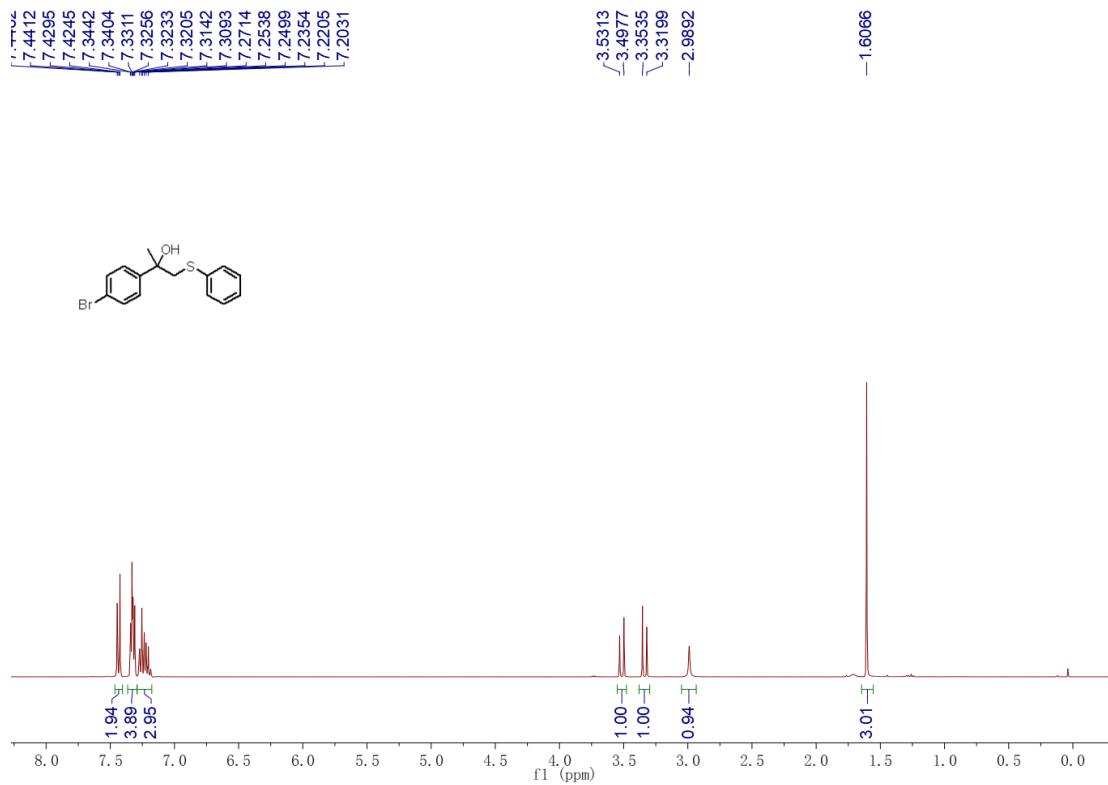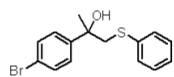

### <sup>13</sup>C NMR spectrum of c9

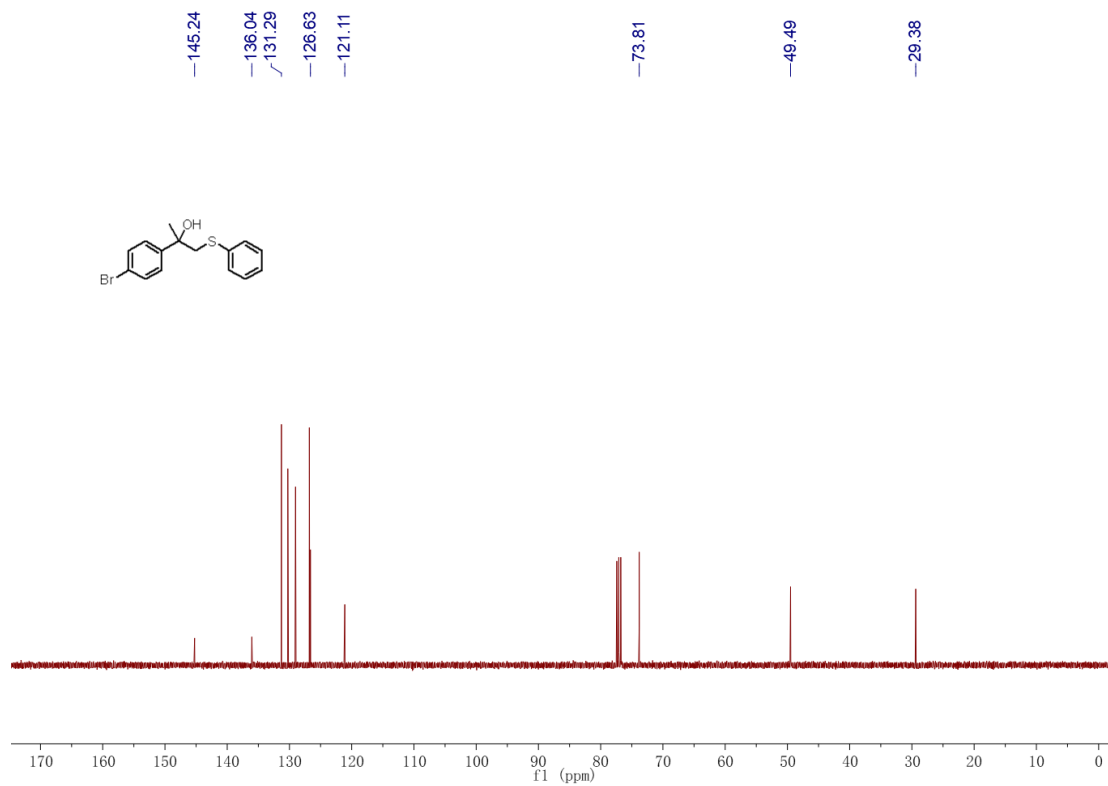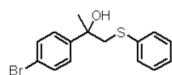

### <sup>1</sup>H NMR spectrum of c10

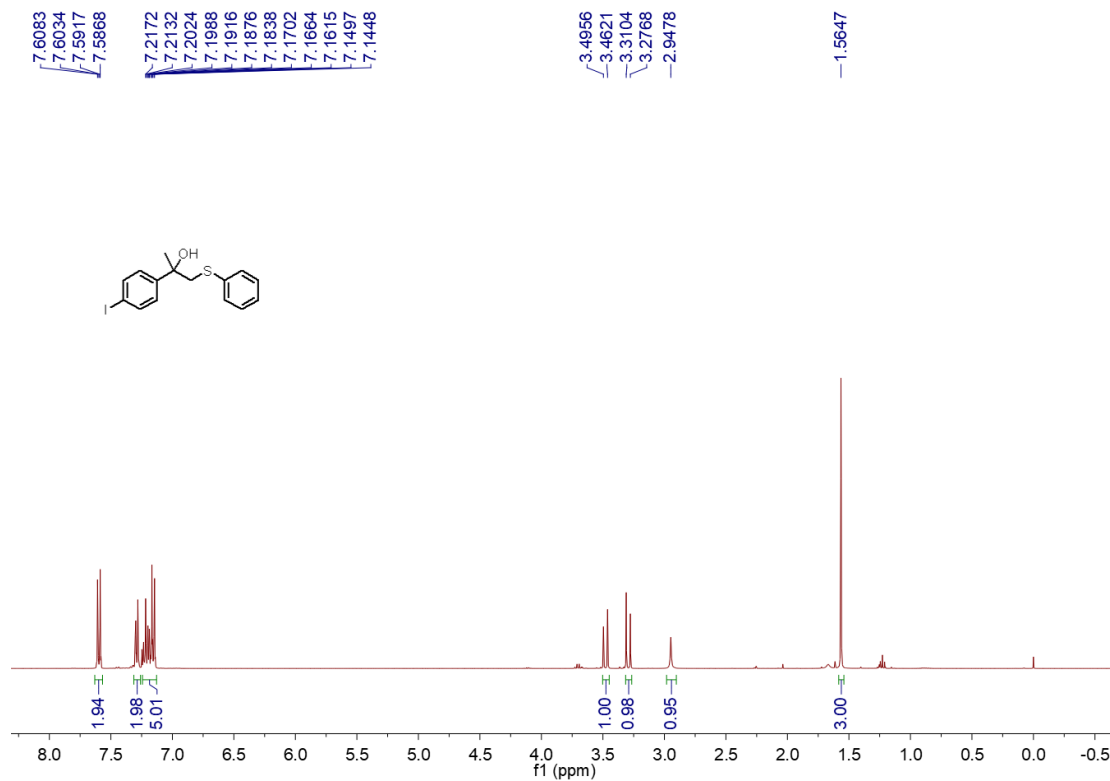

### <sup>13</sup>C NMR spectrum of c10

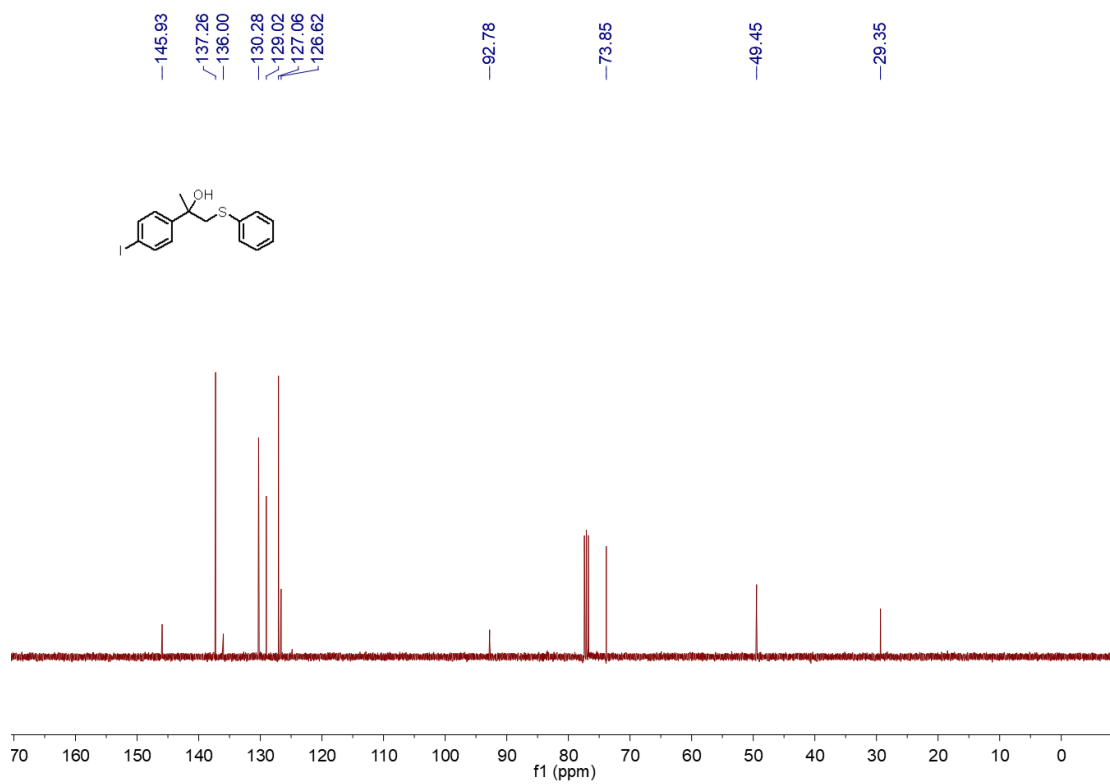

### <sup>1</sup>H NMR spectrum of c11

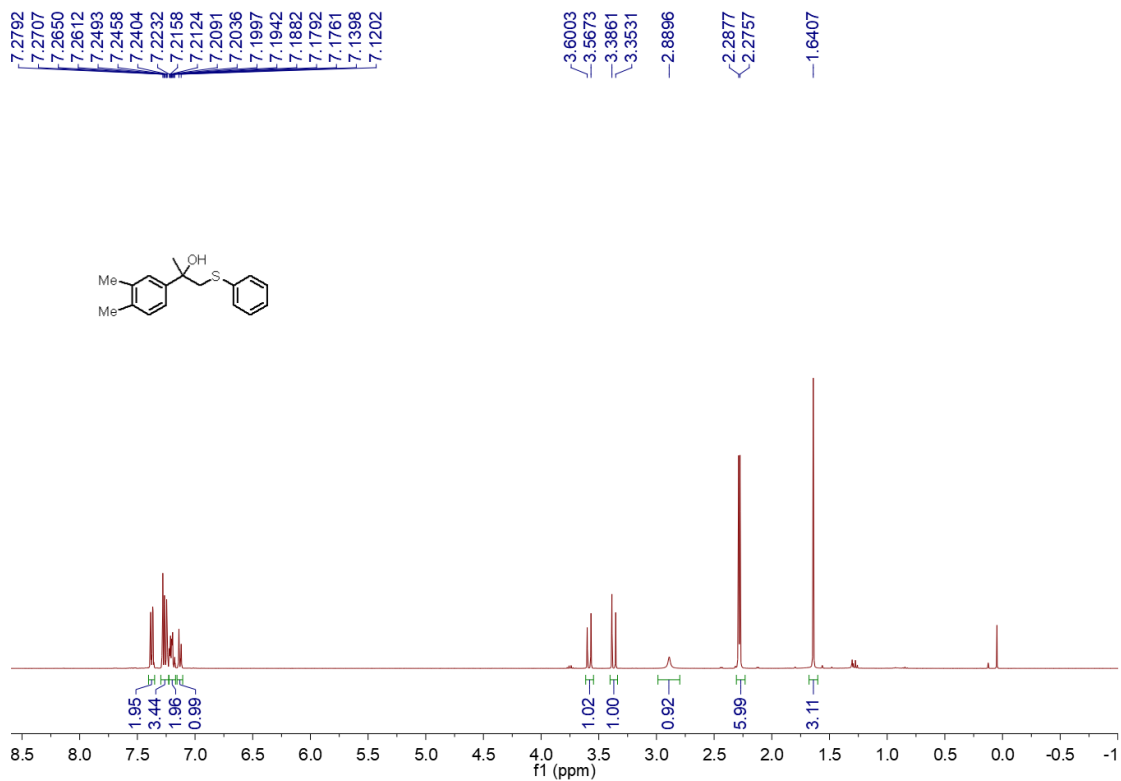

### <sup>13</sup>C NMR spectrum of c11

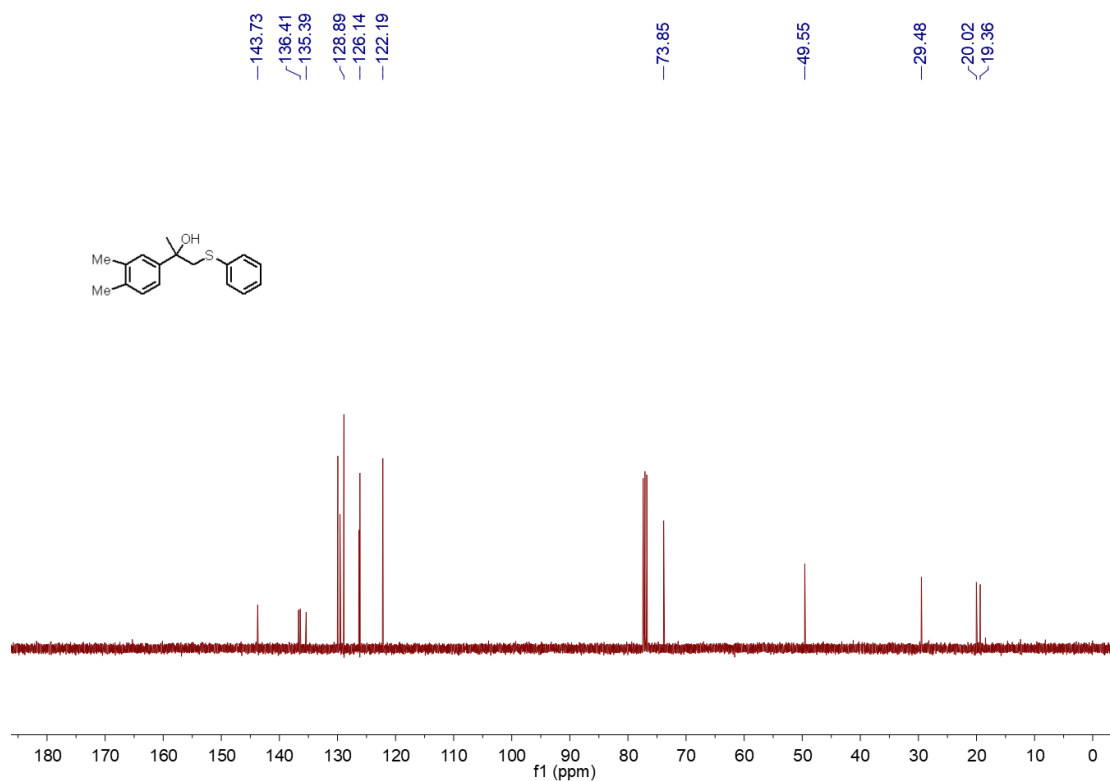

### <sup>1</sup>H NMR spectrum of c12

7.3141  
7.3116  
7.2431  
7.2251  
7.2213  
7.2096  
7.2060  
7.1748  
7.1716  
7.1684  
7.1534  
6.9251  
6.8771  
6.7207  
5.9183  
5.9147  
5.9105  
5.9069  
3.5042  
3.4709  
3.2981  
3.2659  
2.9049  
1.5692

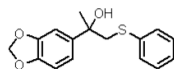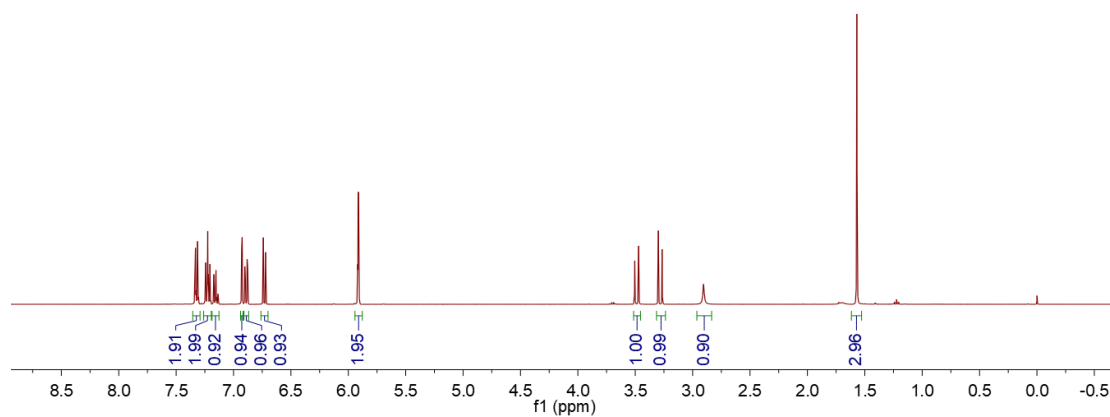

### <sup>13</sup>C NMR spectrum of c12

147.63  
146.51  
140.41  
136.43  
130.04  
128.94  
126.43  
118.06  
107.86  
105.99  
101.04  
73.91  
49.66  
29.50

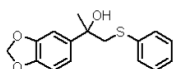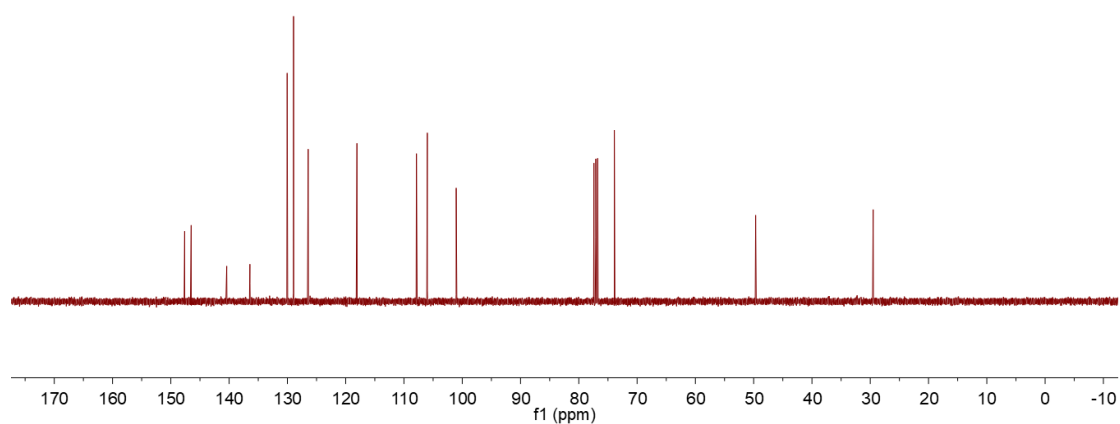



### <sup>1</sup>H NMR spectrum of c13

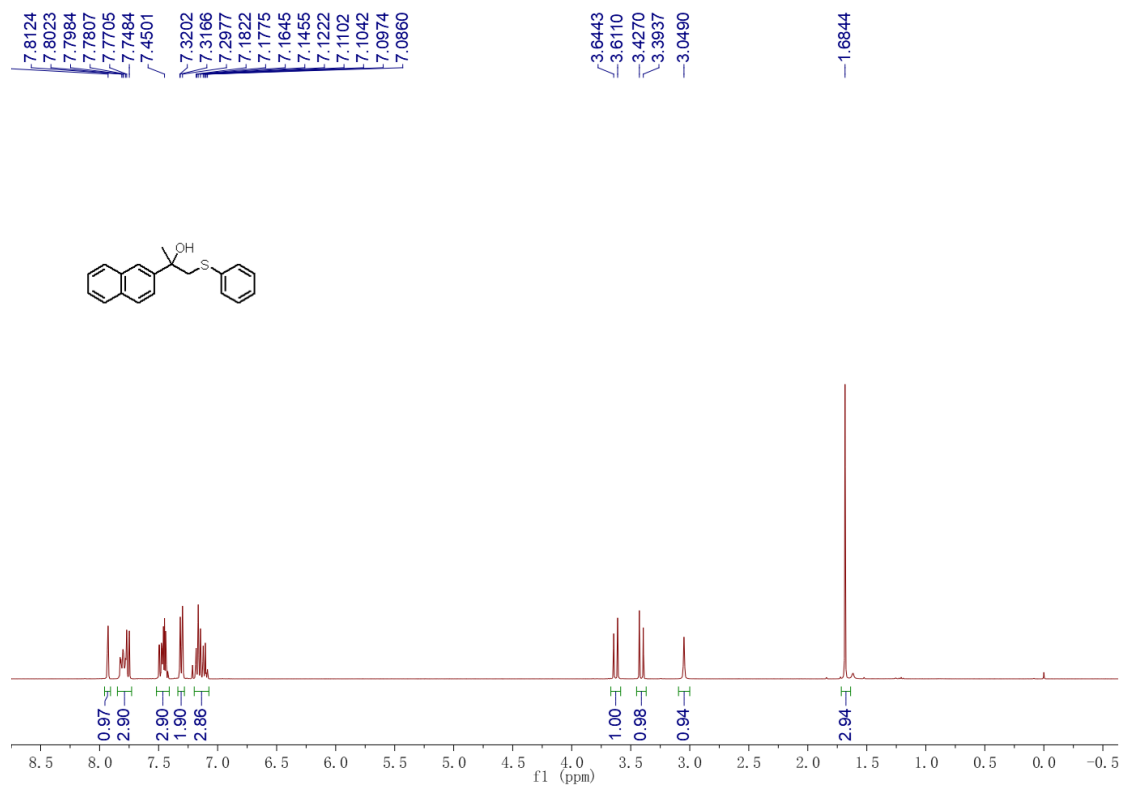

### <sup>13</sup>C NMR spectrum of c13

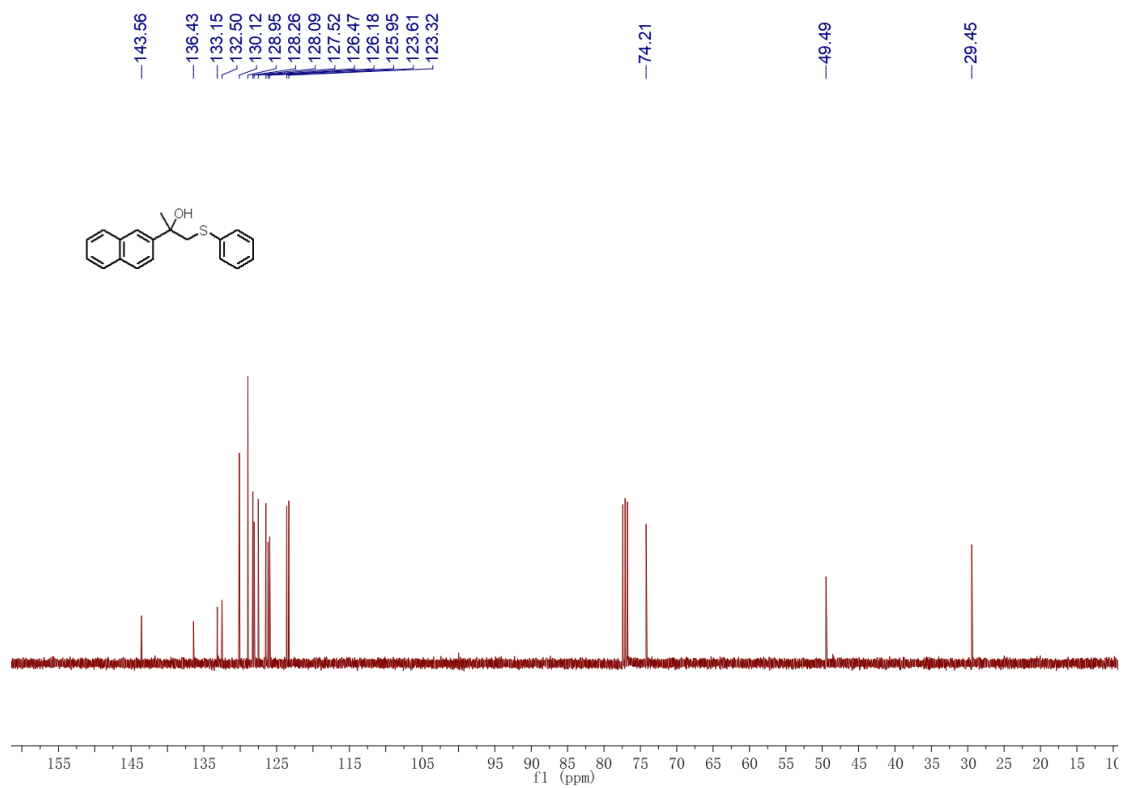

### <sup>1</sup>H NMR spectrum of c14

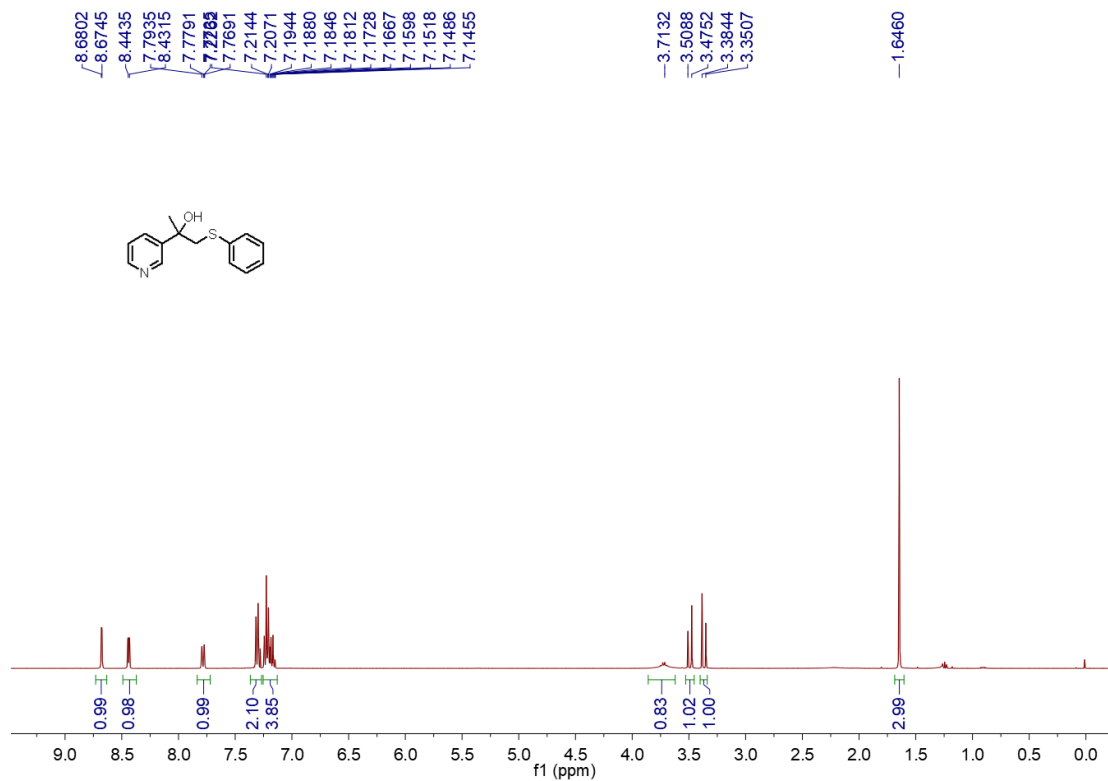

### <sup>13</sup>C NMR spectrum of c14

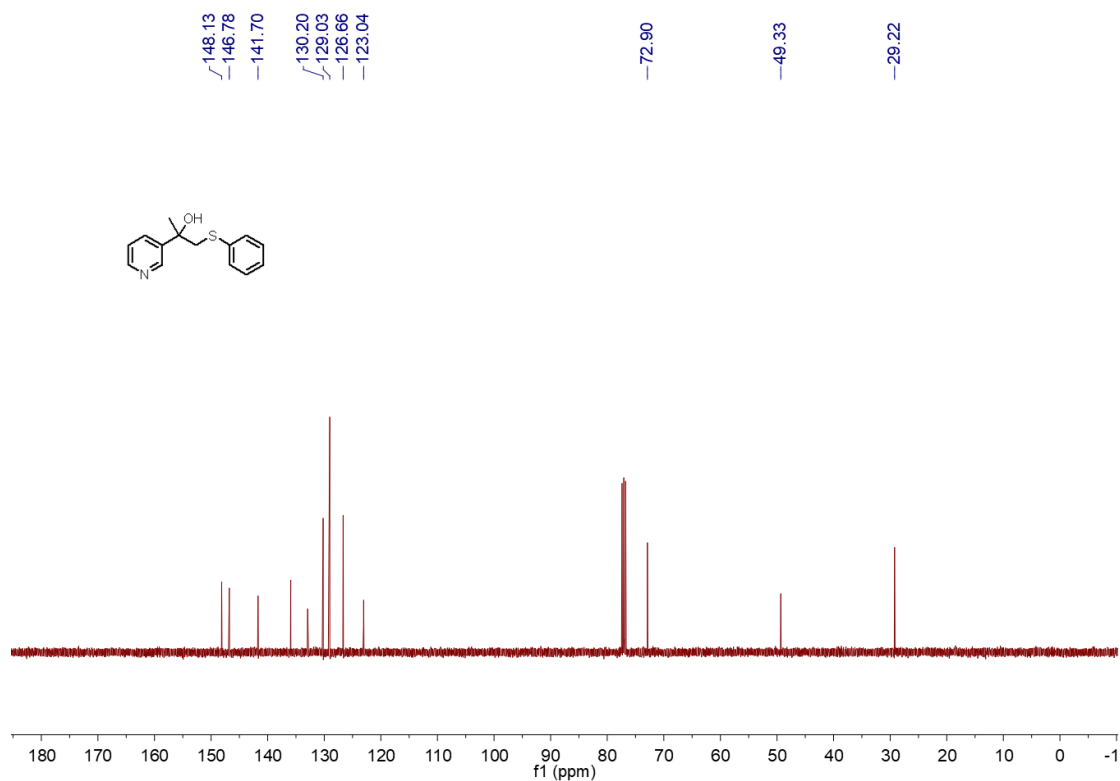

### <sup>1</sup>H NMR spectrum of c15

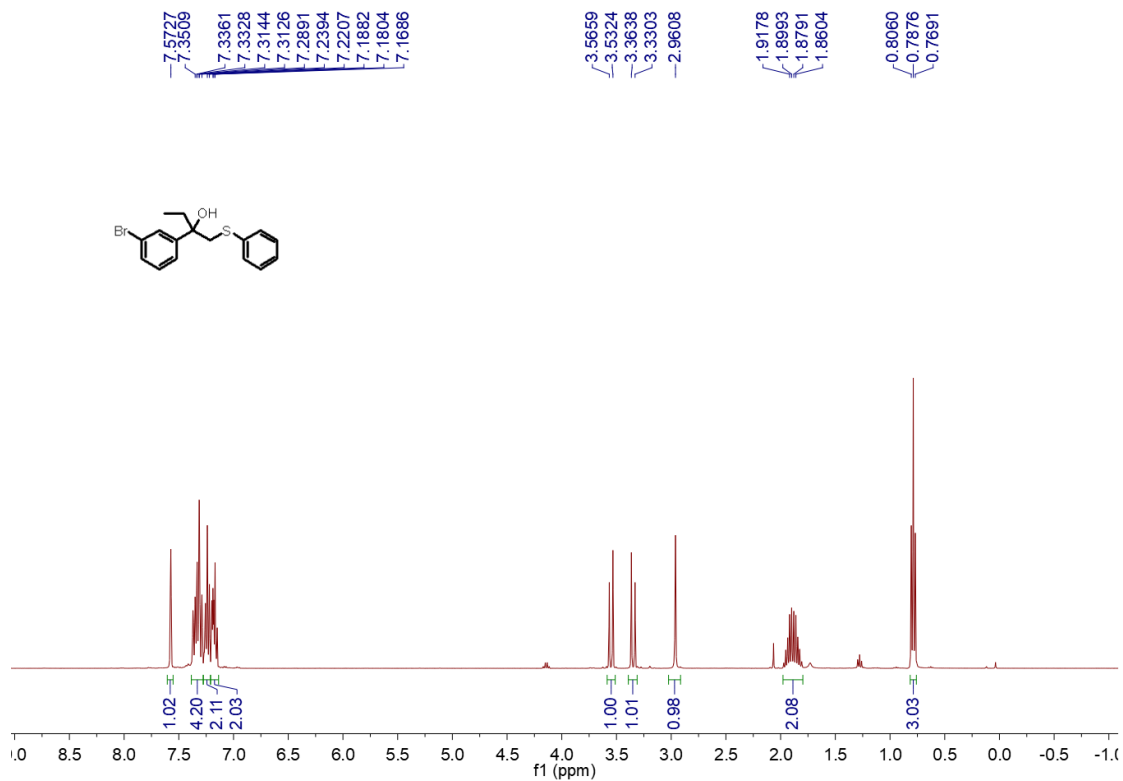

### <sup>13</sup>C NMR spectrum of c15

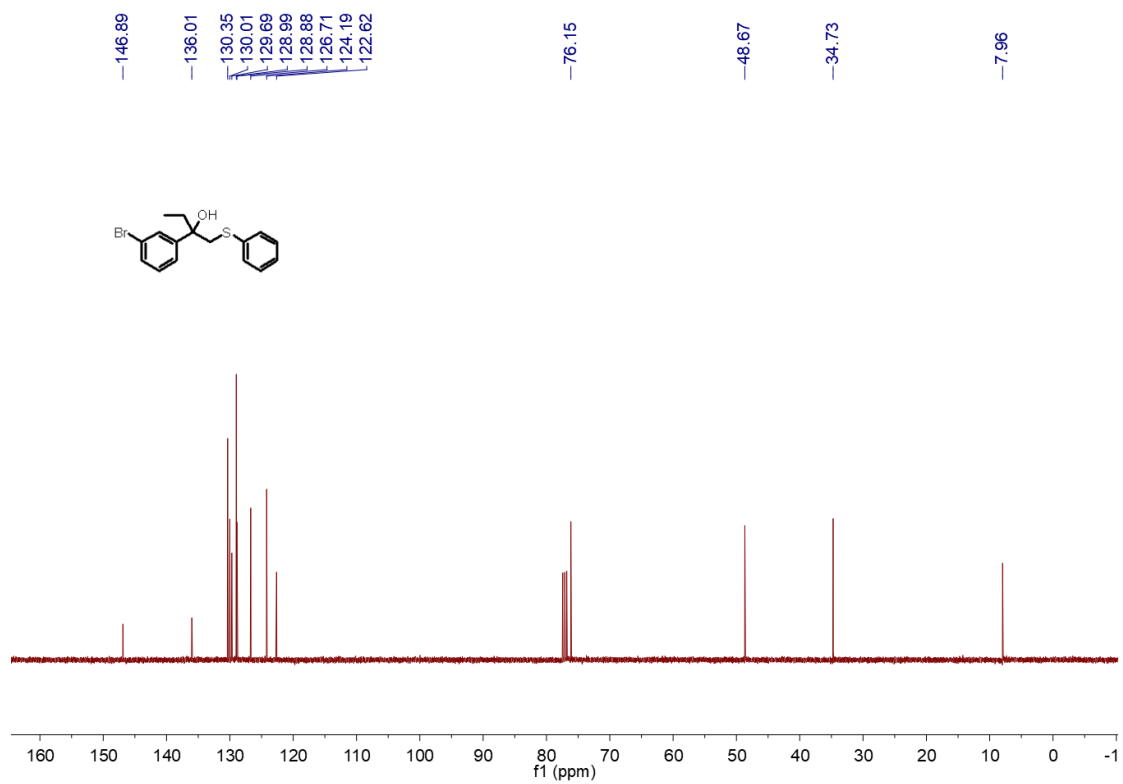

### <sup>1</sup>H NMR spectrum of c16

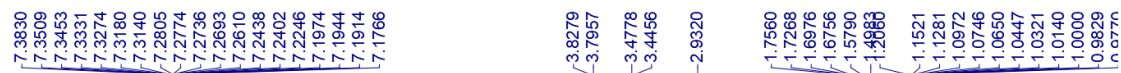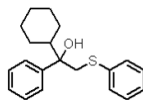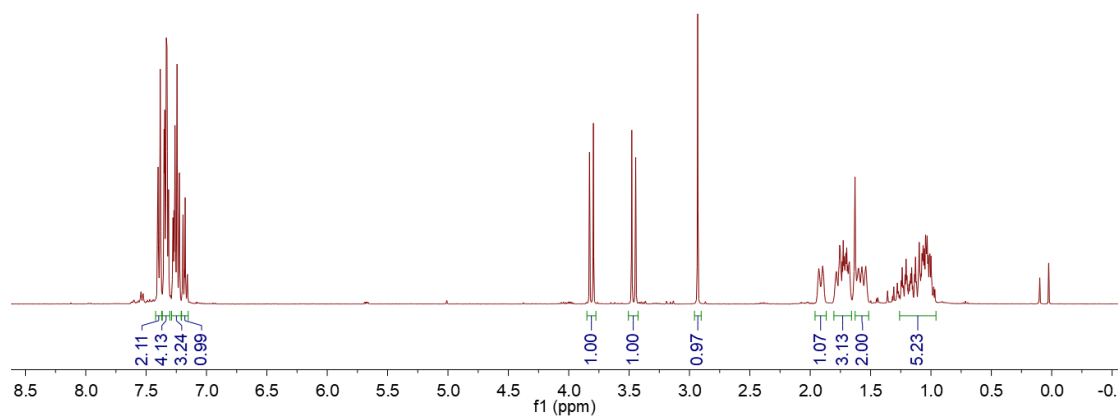

### <sup>13</sup>C NMR spectrum of c16

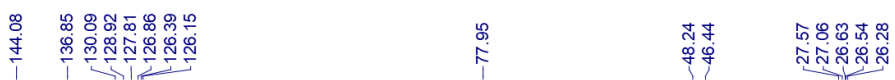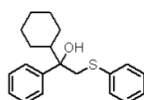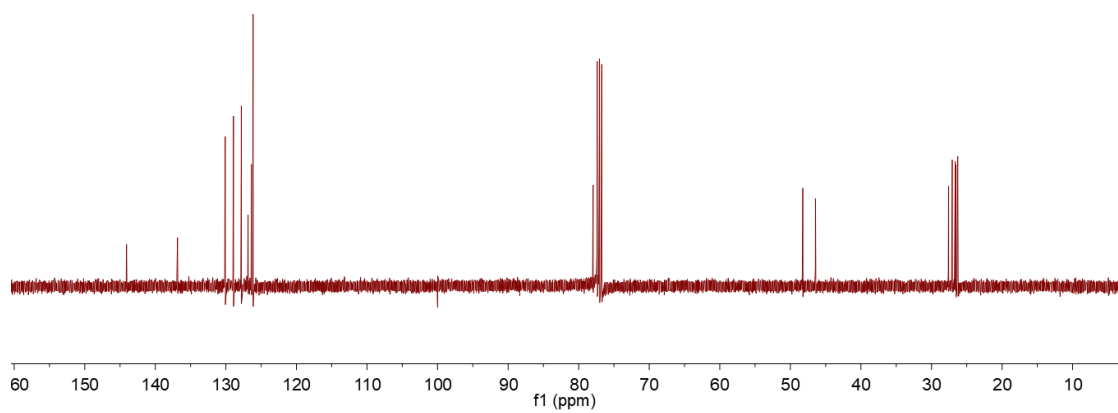

### <sup>1</sup>H NMR spectrum of c17

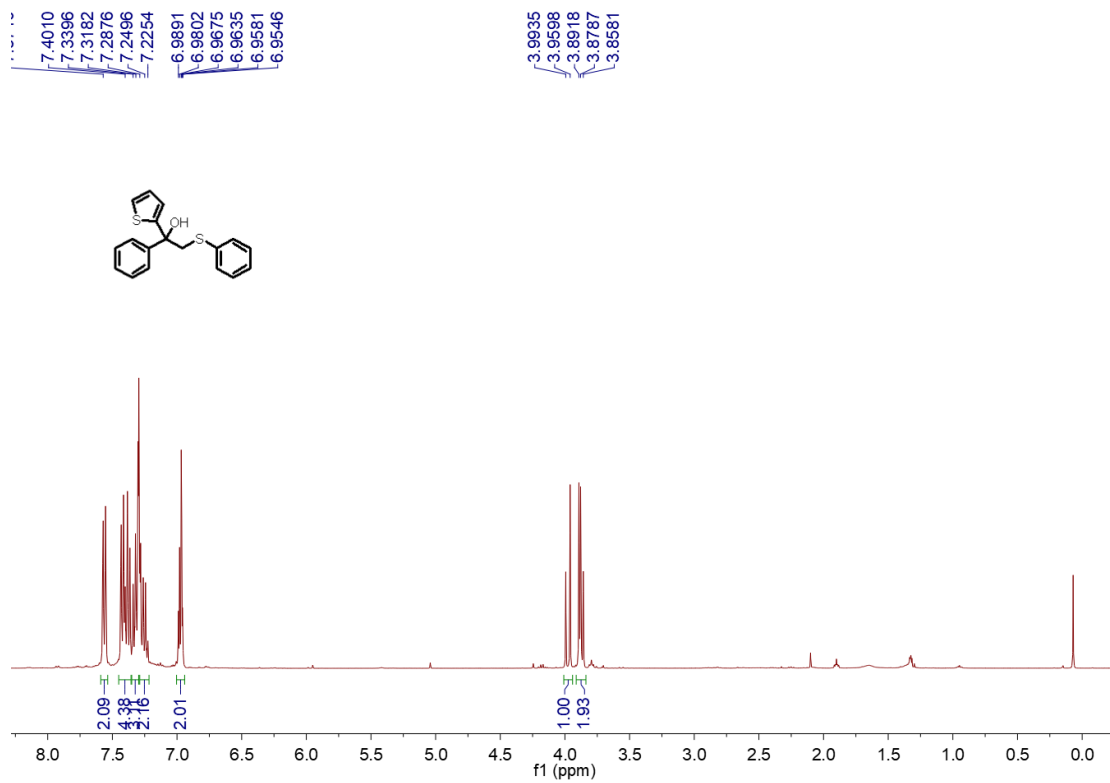

### <sup>13</sup>C NMR spectrum of c17

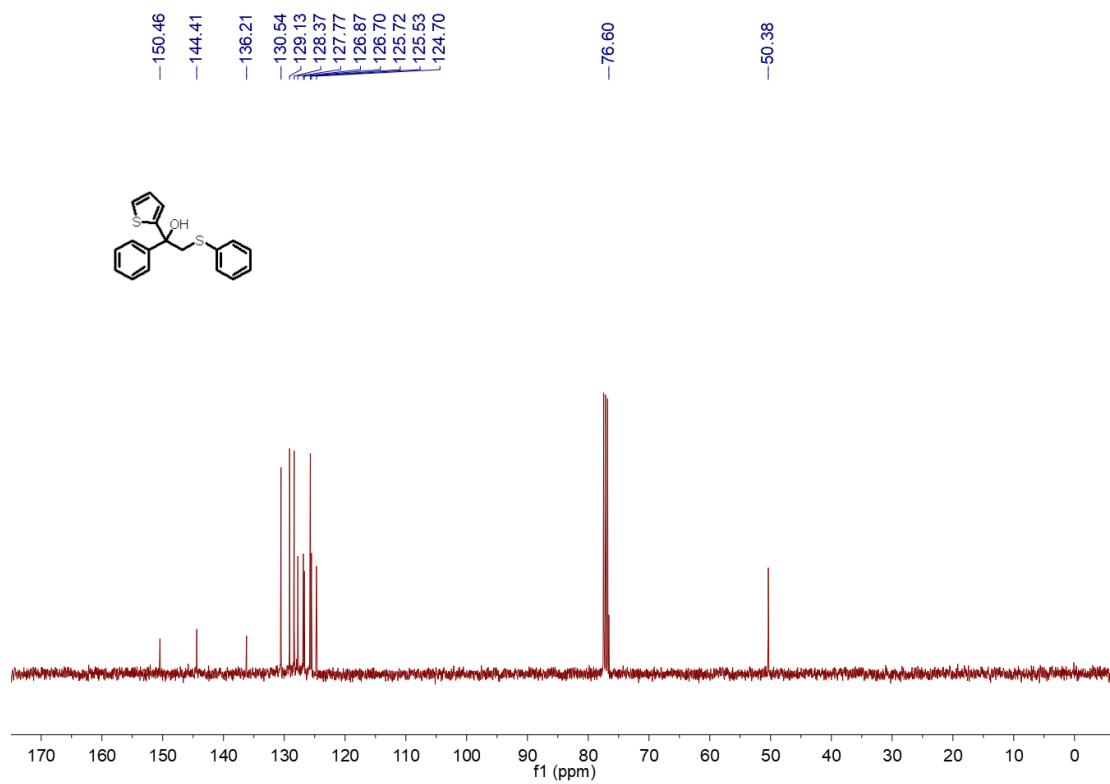

### <sup>1</sup>H NMR spectrum of c18

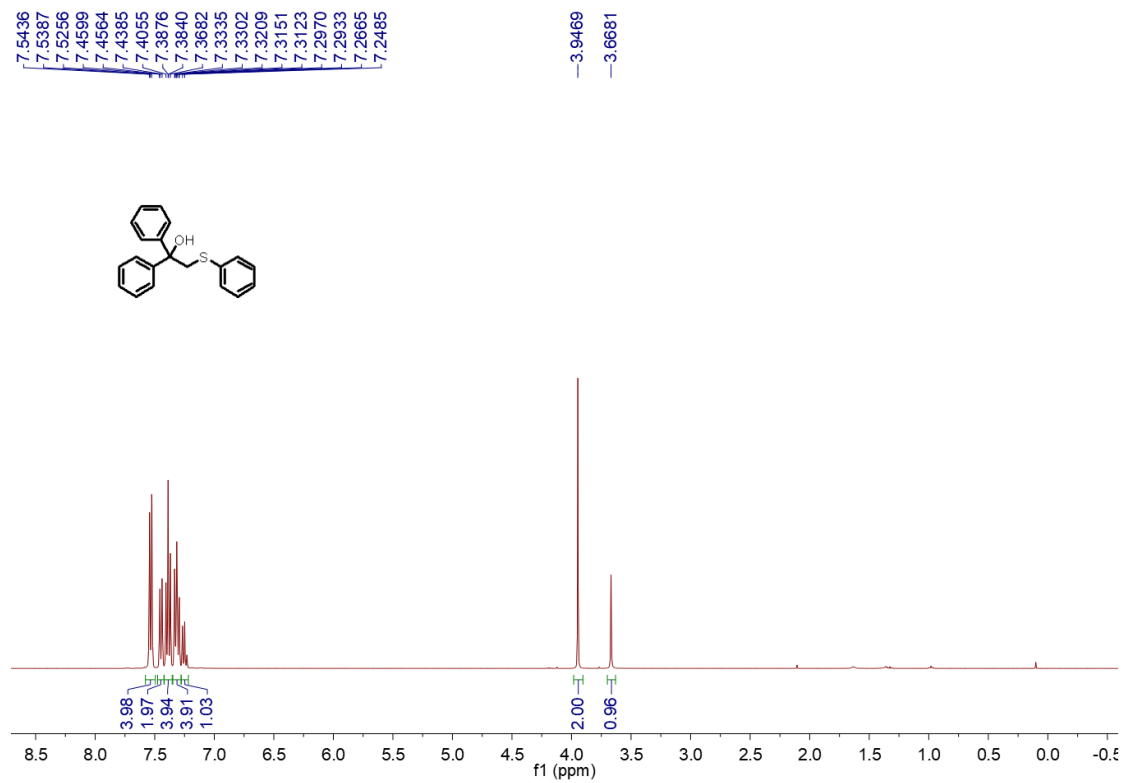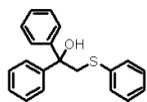

### <sup>13</sup>C NMR spectrum of c18

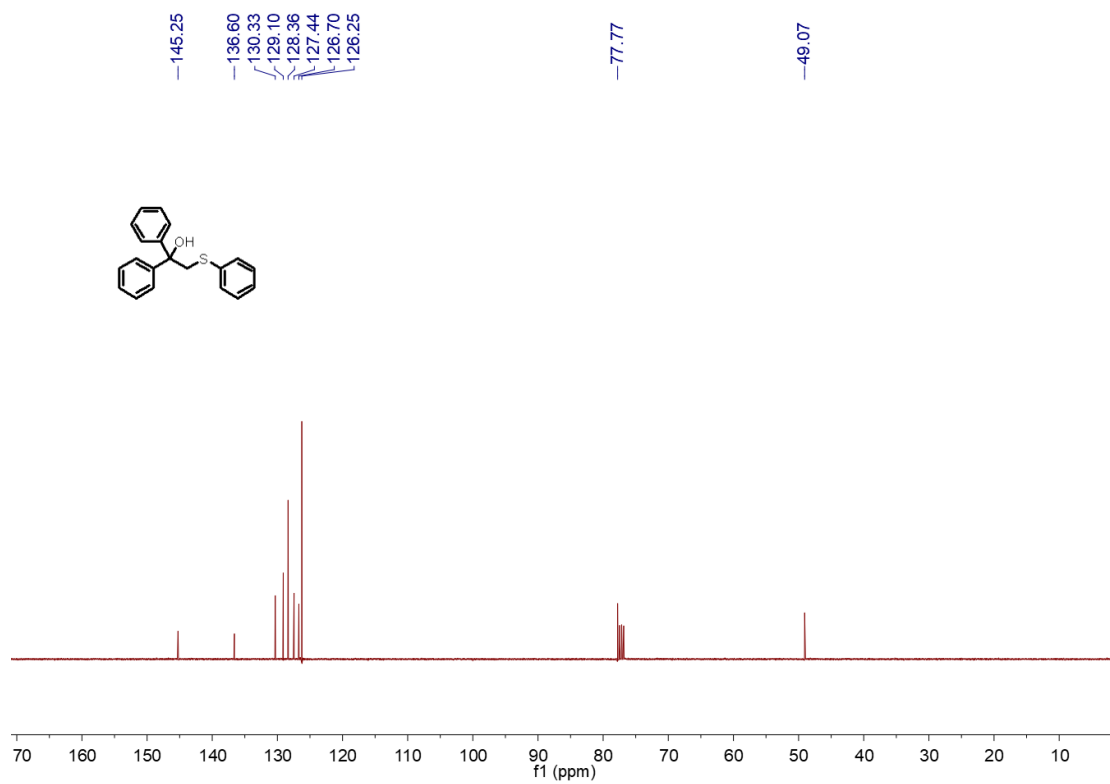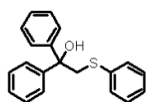

### <sup>1</sup>H NMR spectrum of c19

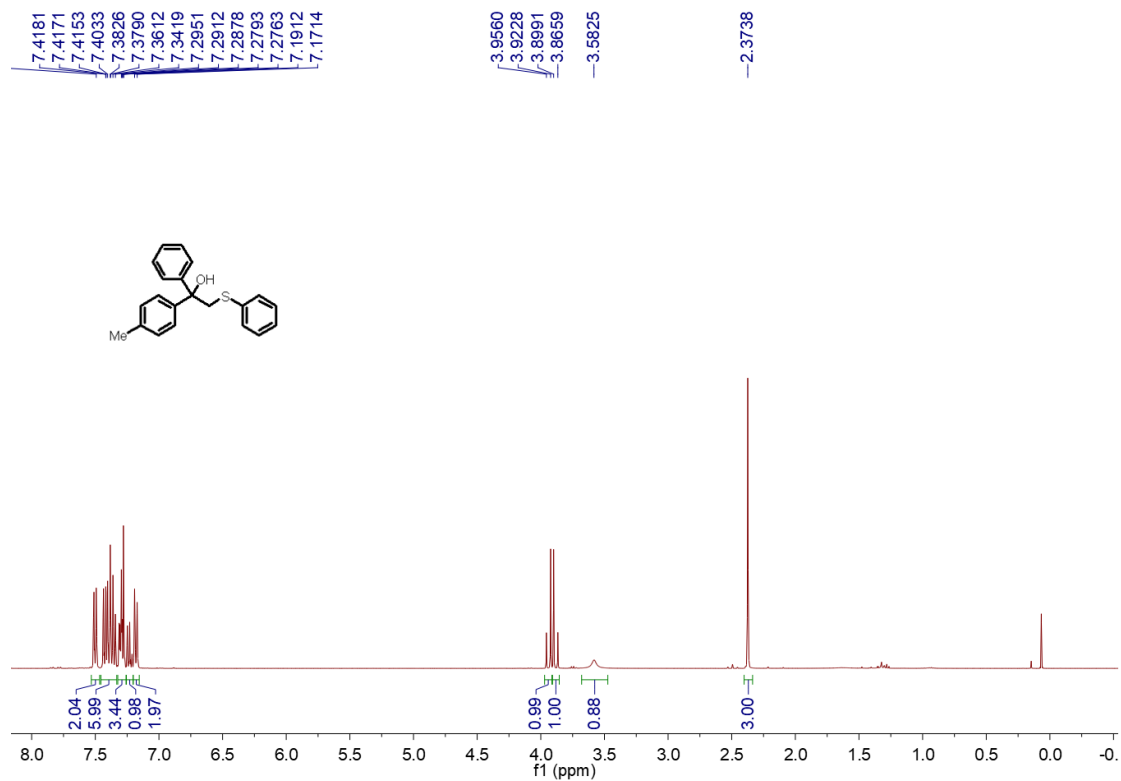

### <sup>13</sup>C NMR spectrum of c19

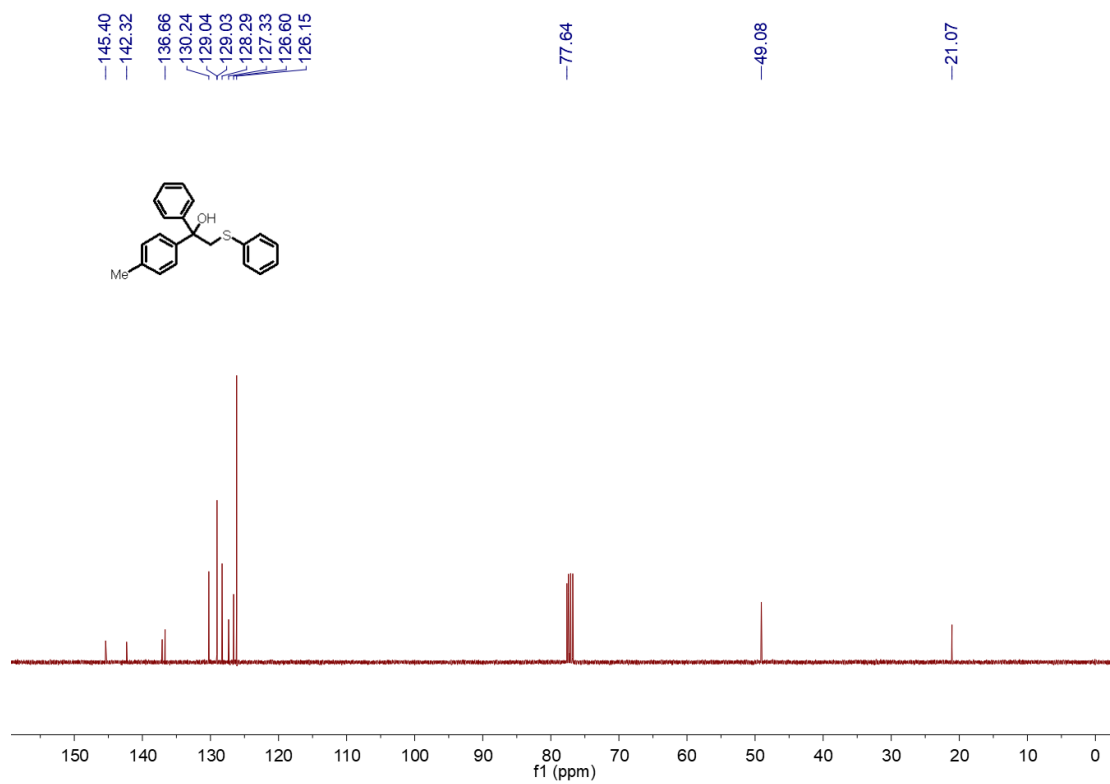

### <sup>1</sup>H NMR spectrum of c20

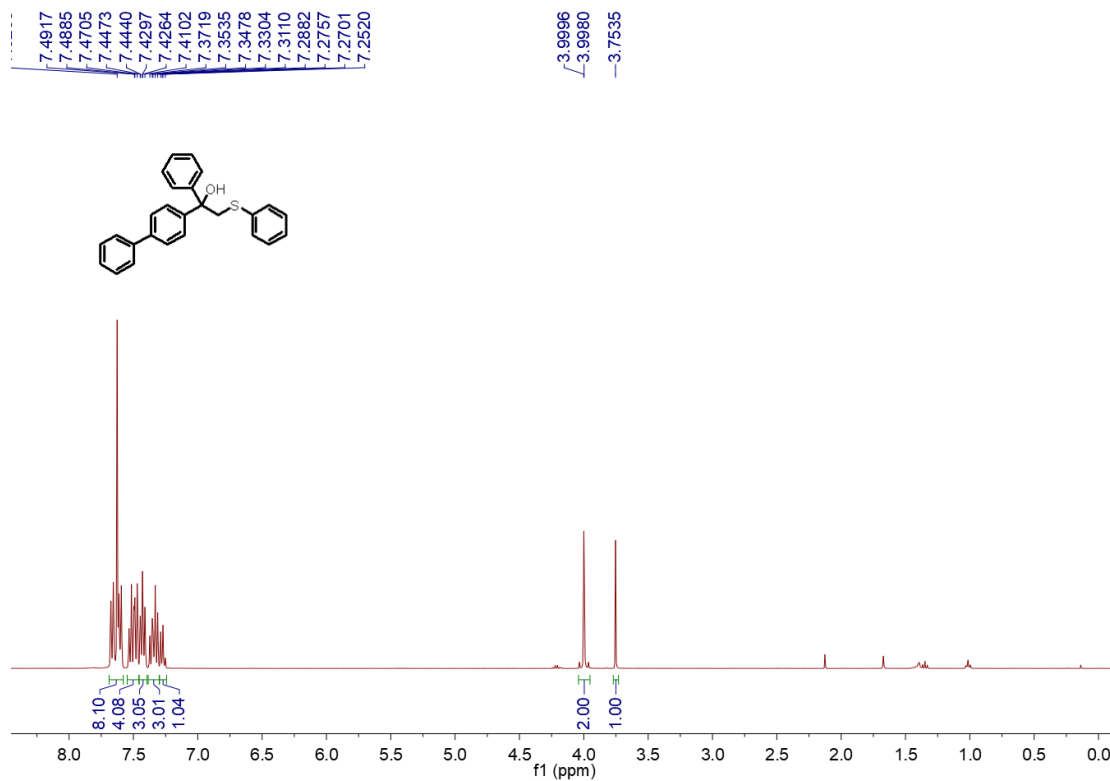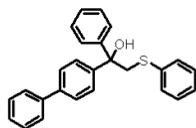

### <sup>13</sup>C NMR spectrum of c20

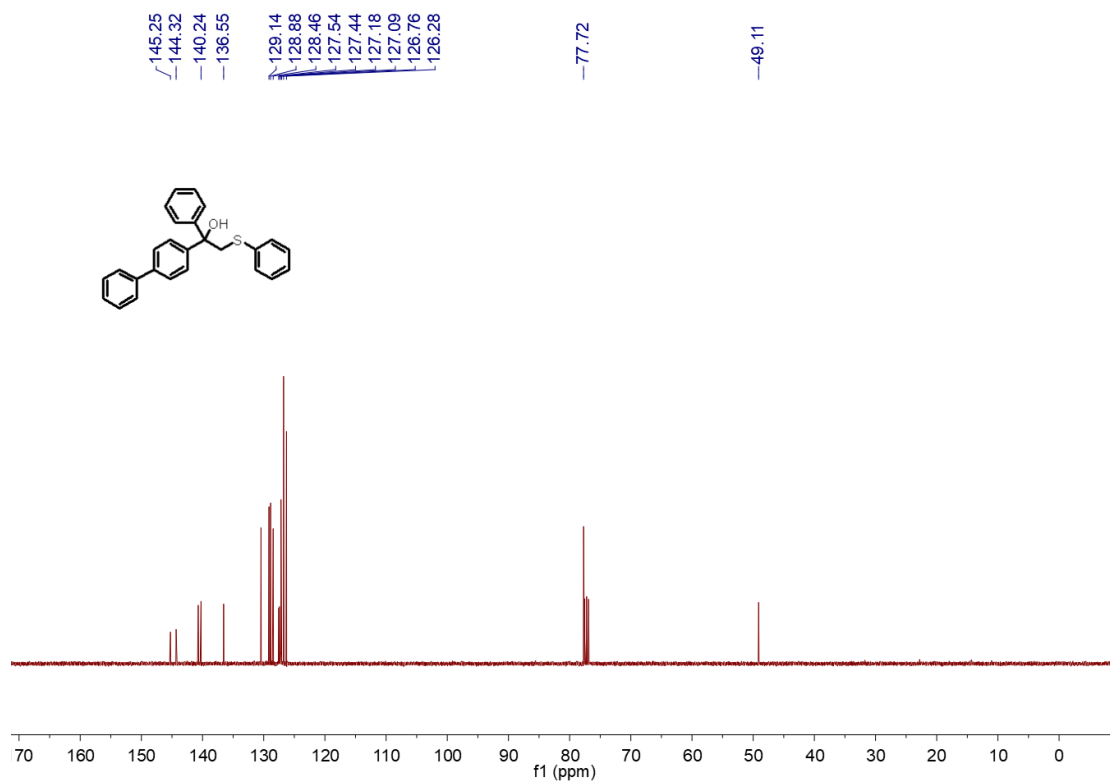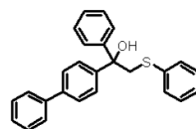



### <sup>1</sup>H NMR spectrum of c21

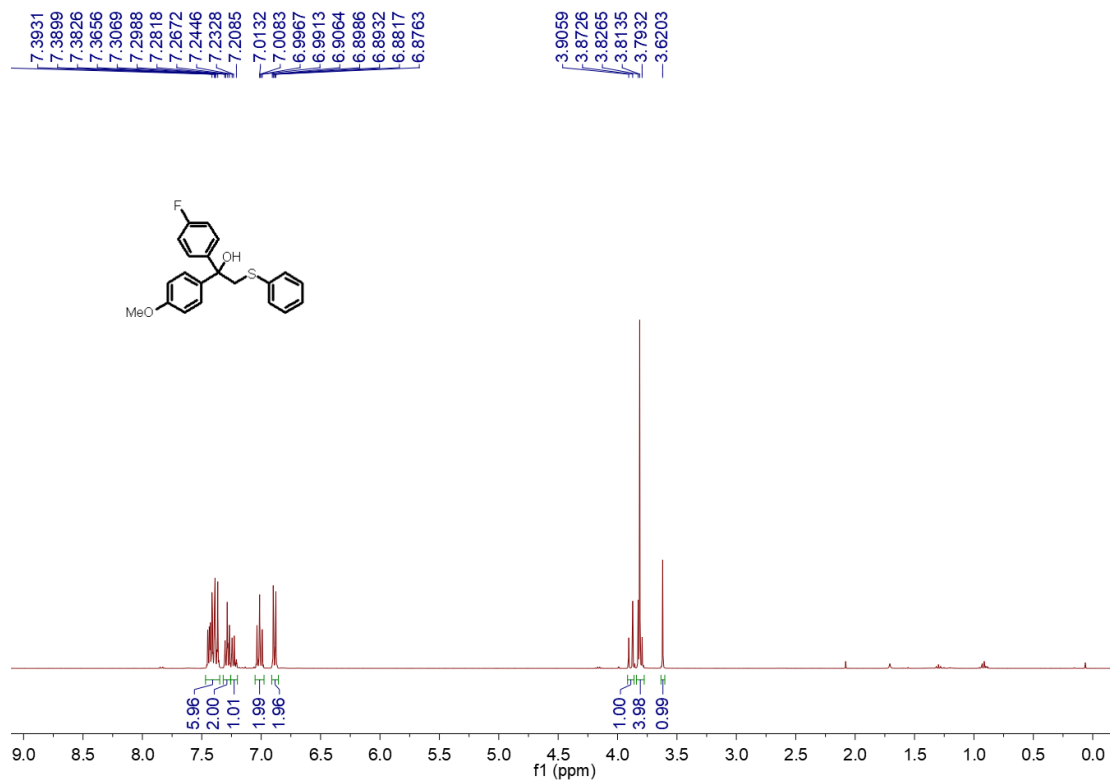

### <sup>13</sup>C NMR spectrum of c21

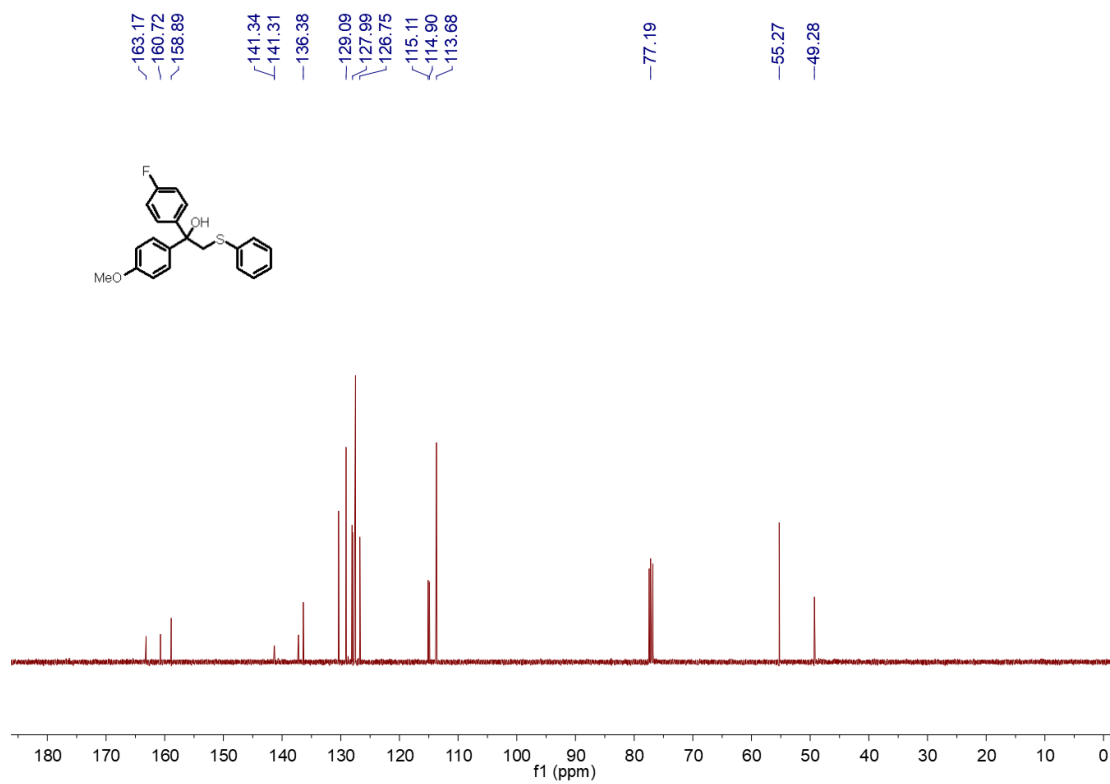

### <sup>19</sup>F NMR spectrum of c21

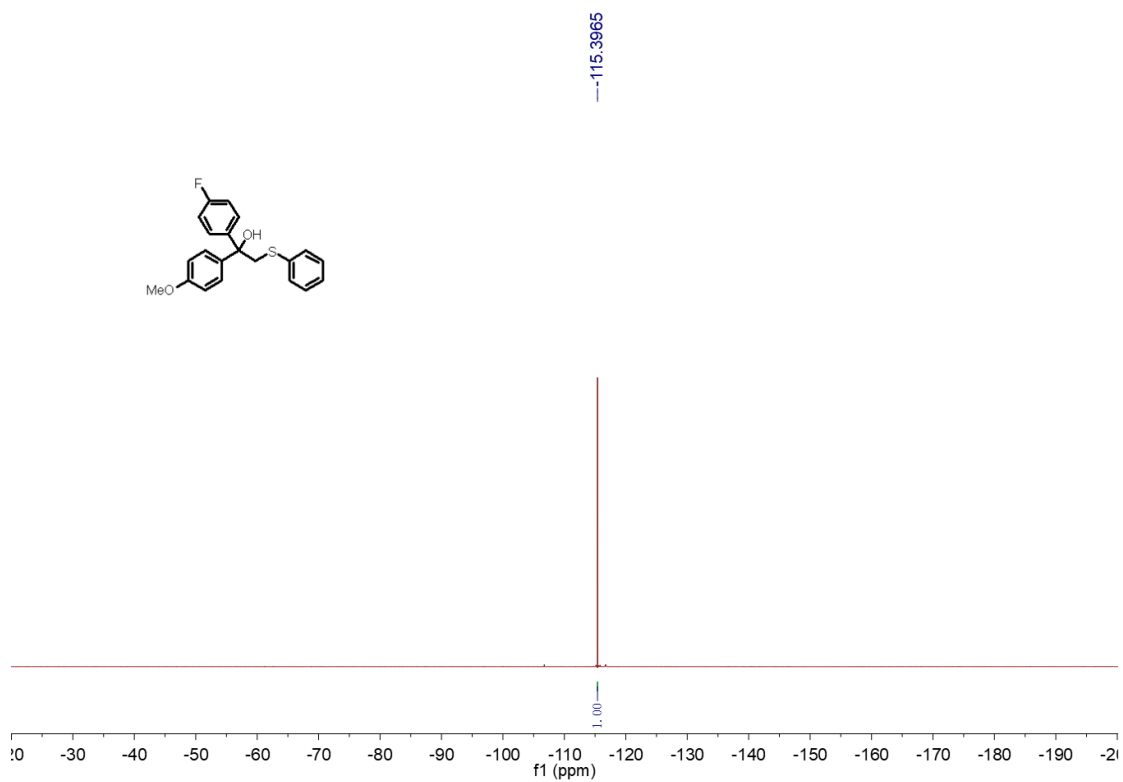

### <sup>1</sup>H NMR spectrum of c22

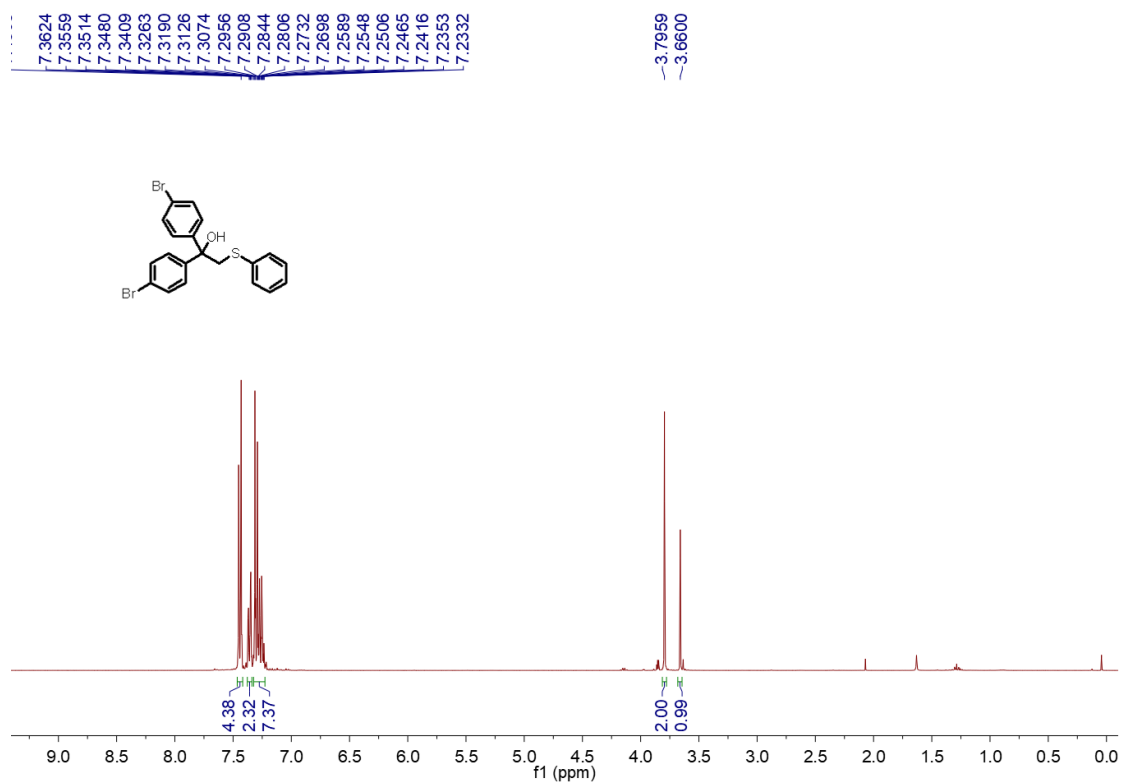

### <sup>13</sup>C NMR spectrum of c22

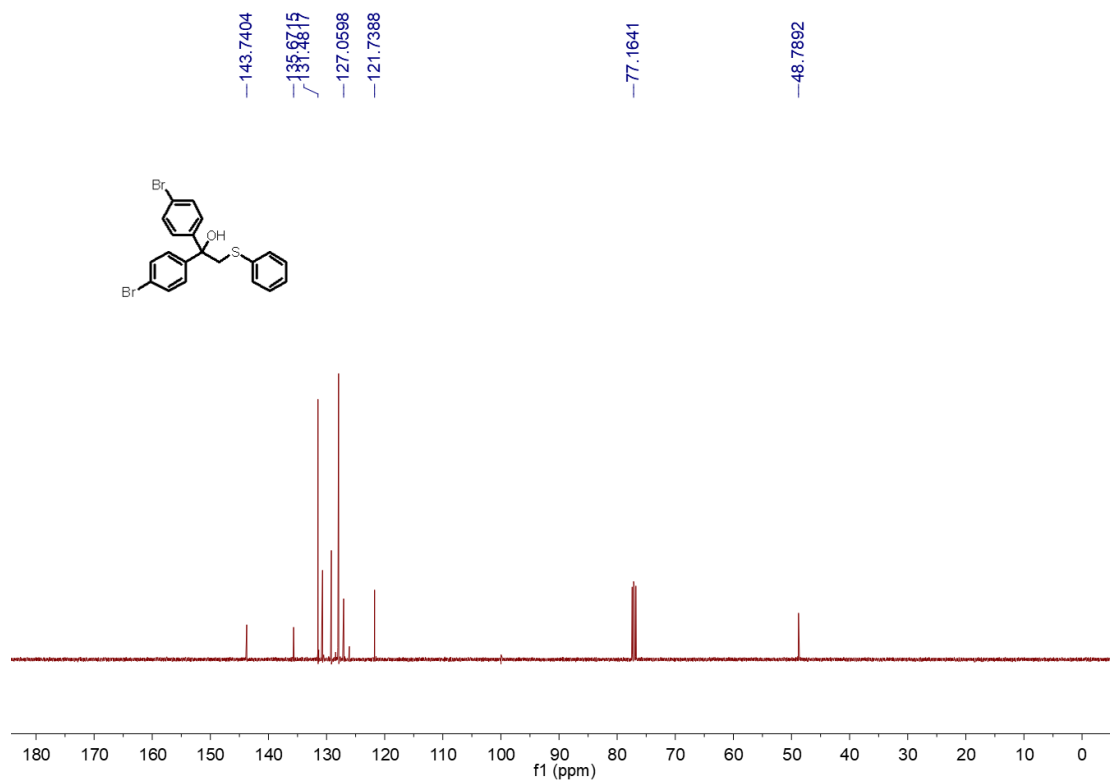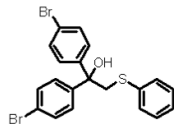

### <sup>1</sup>H NMR spectrum of c23

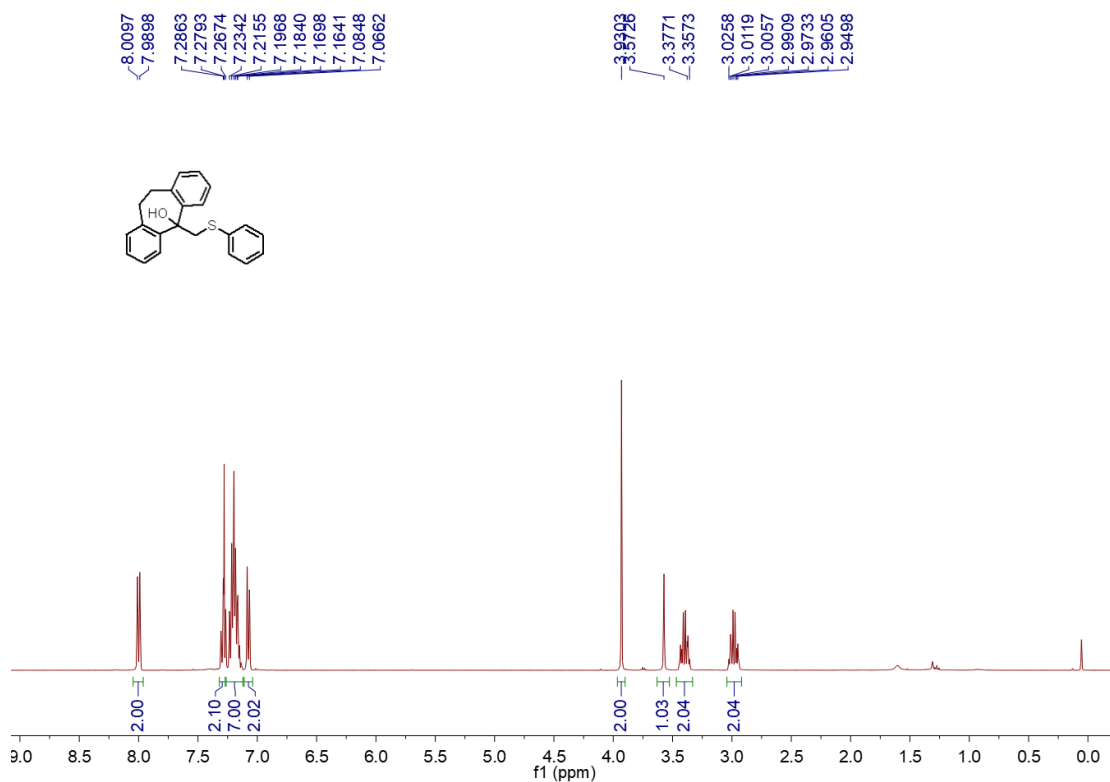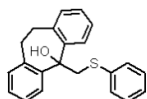

### <sup>13</sup>C NMR spectrum of c23

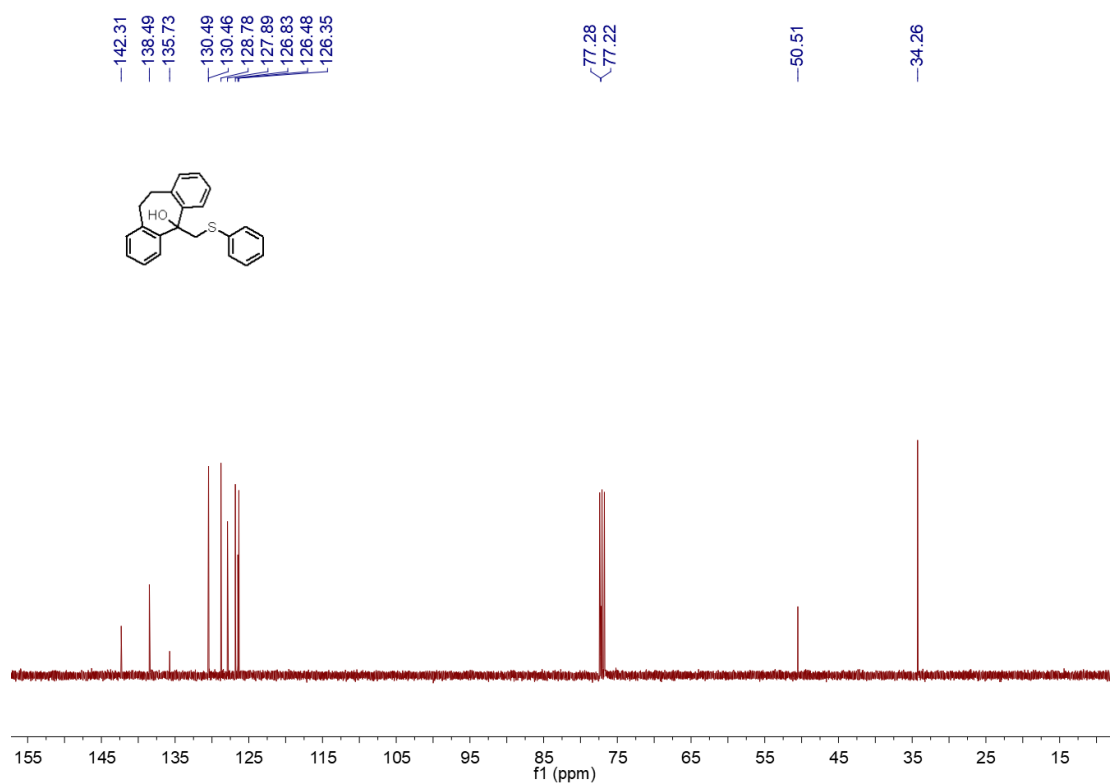

### <sup>1</sup>H NMR spectrum of c24

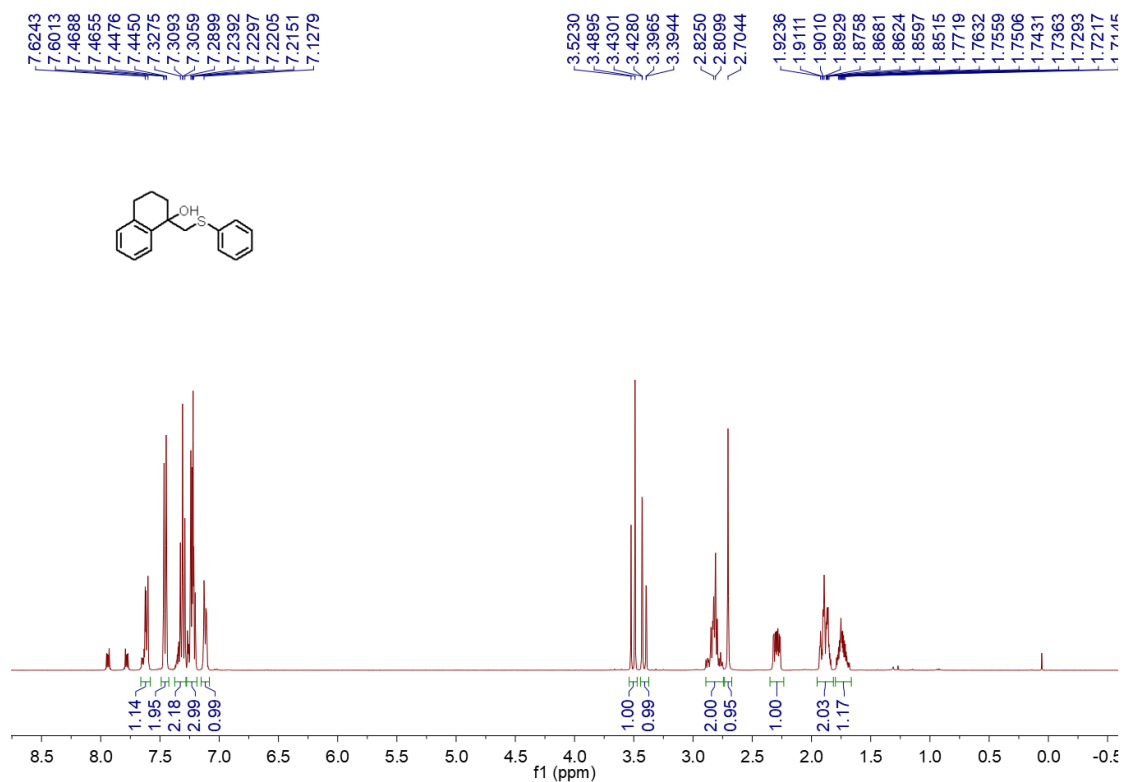

### <sup>13</sup>C NMR spectrum of c24

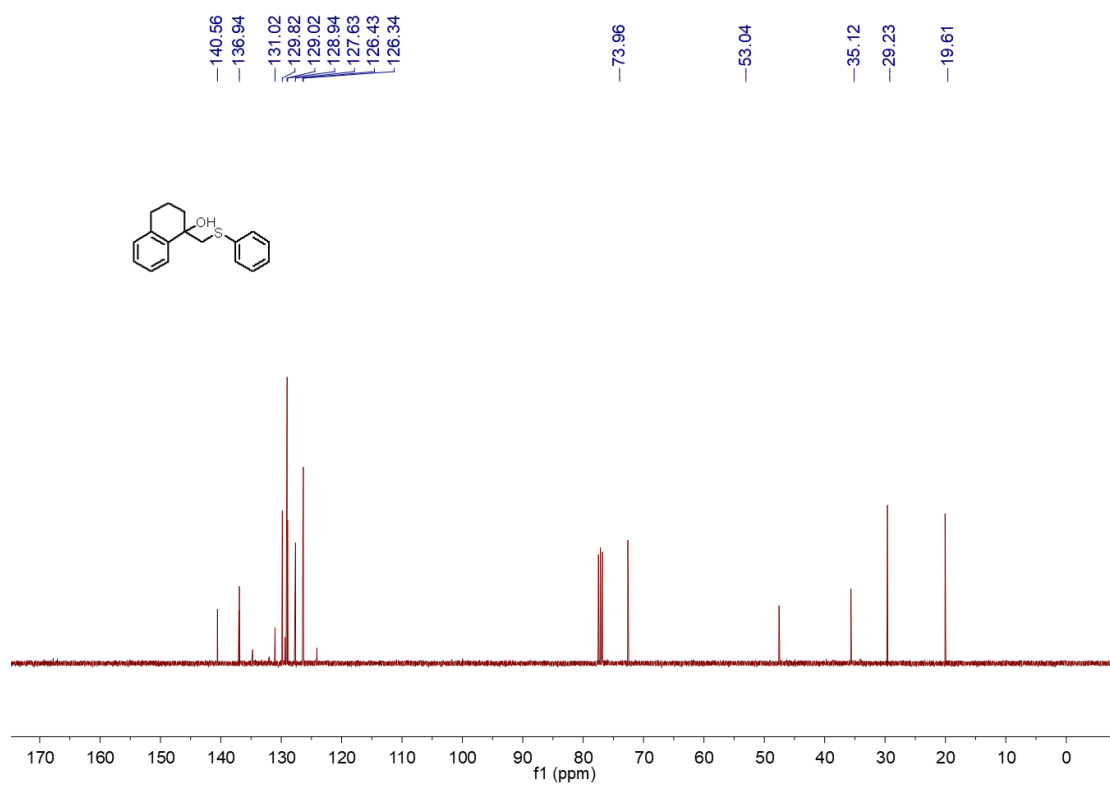

### <sup>1</sup>H NMR spectrum of c25

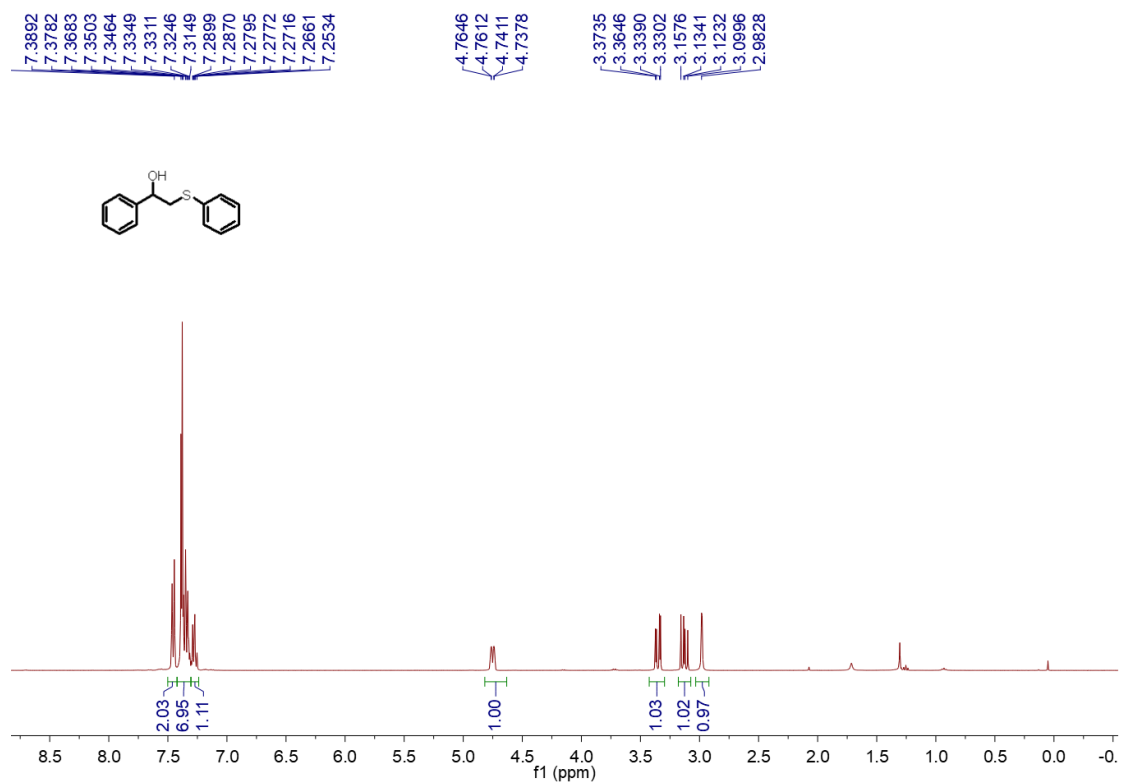

### <sup>13</sup>C NMR spectrum of c25

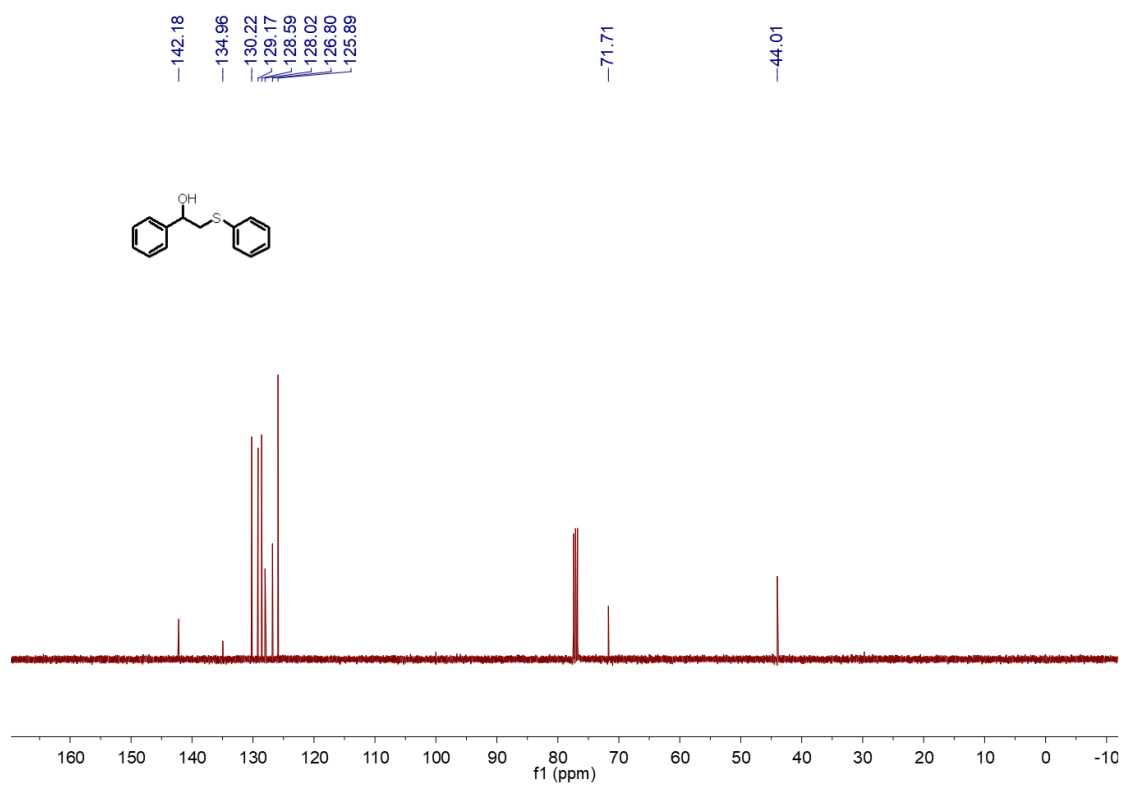

### <sup>1</sup>H NMR spectrum of c26

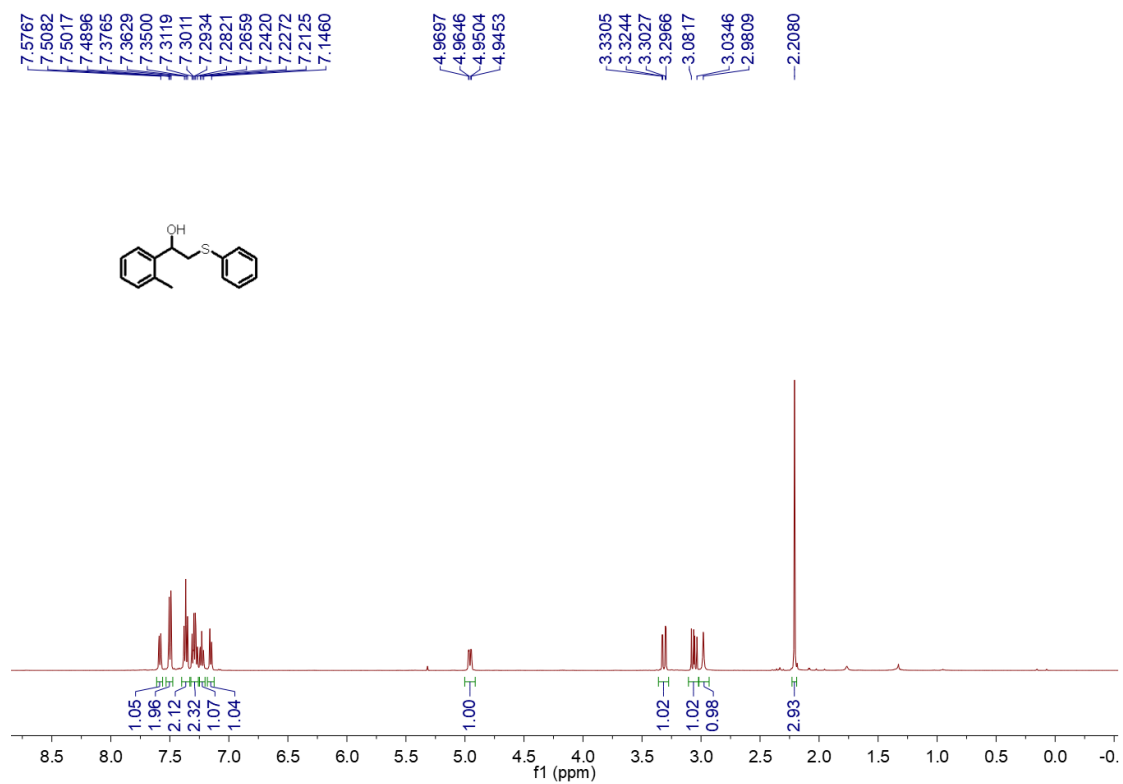

### <sup>13</sup>C NMR spectrum of c26

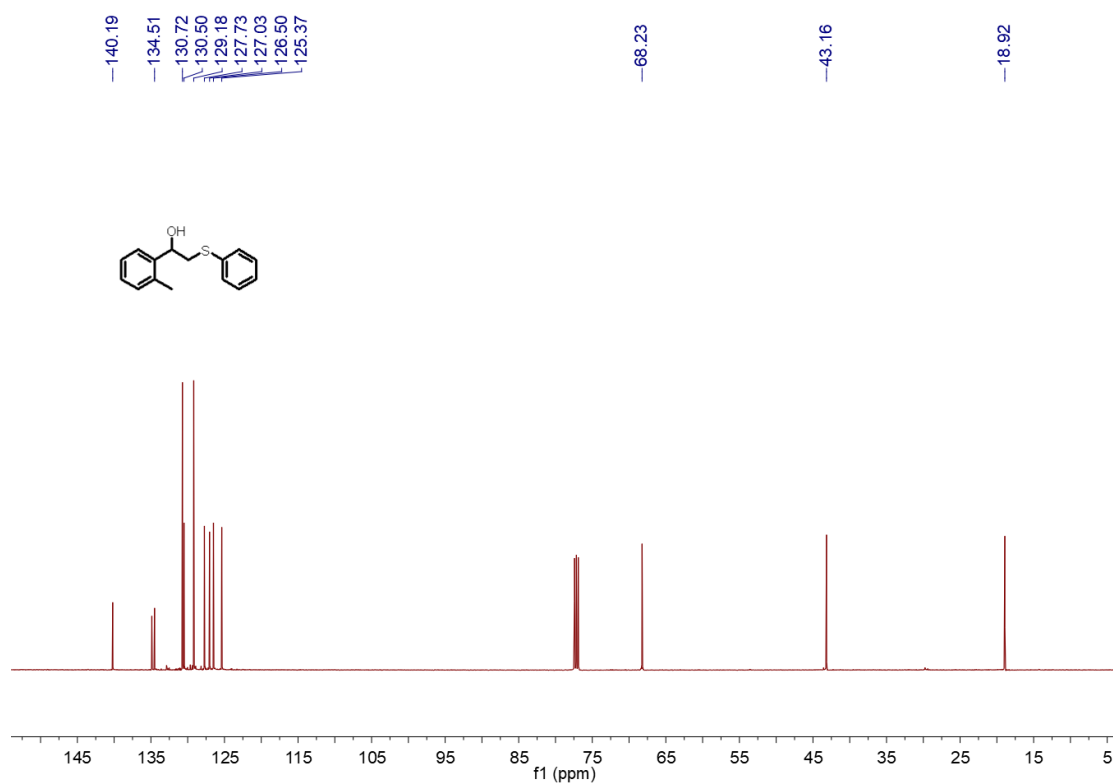

### <sup>1</sup>H NMR spectrum of c27

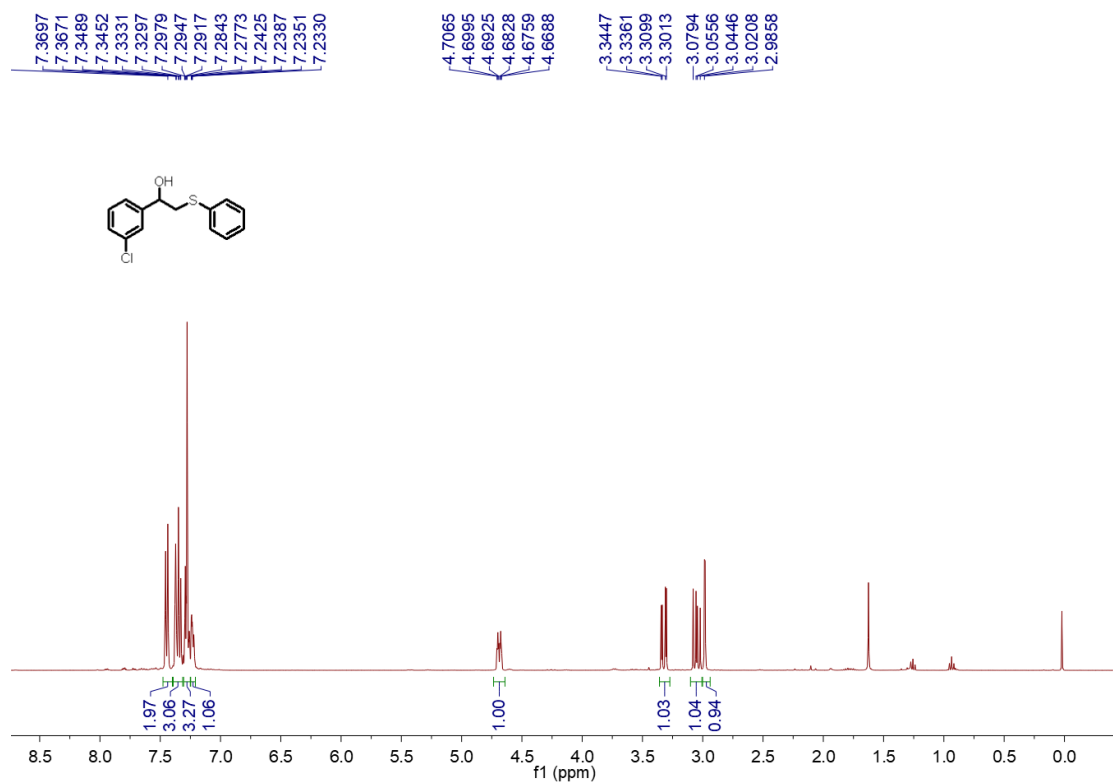

### <sup>13</sup>C NMR spectrum of c27

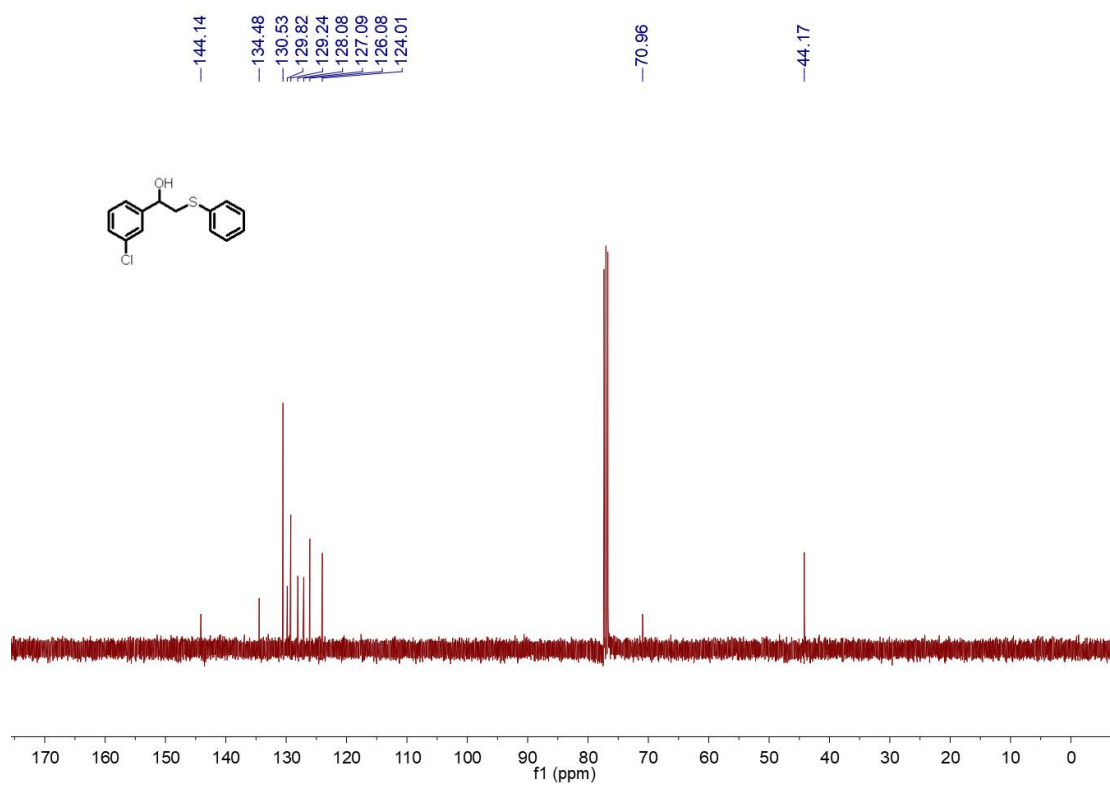

### <sup>1</sup>H NMR spectrum of c28

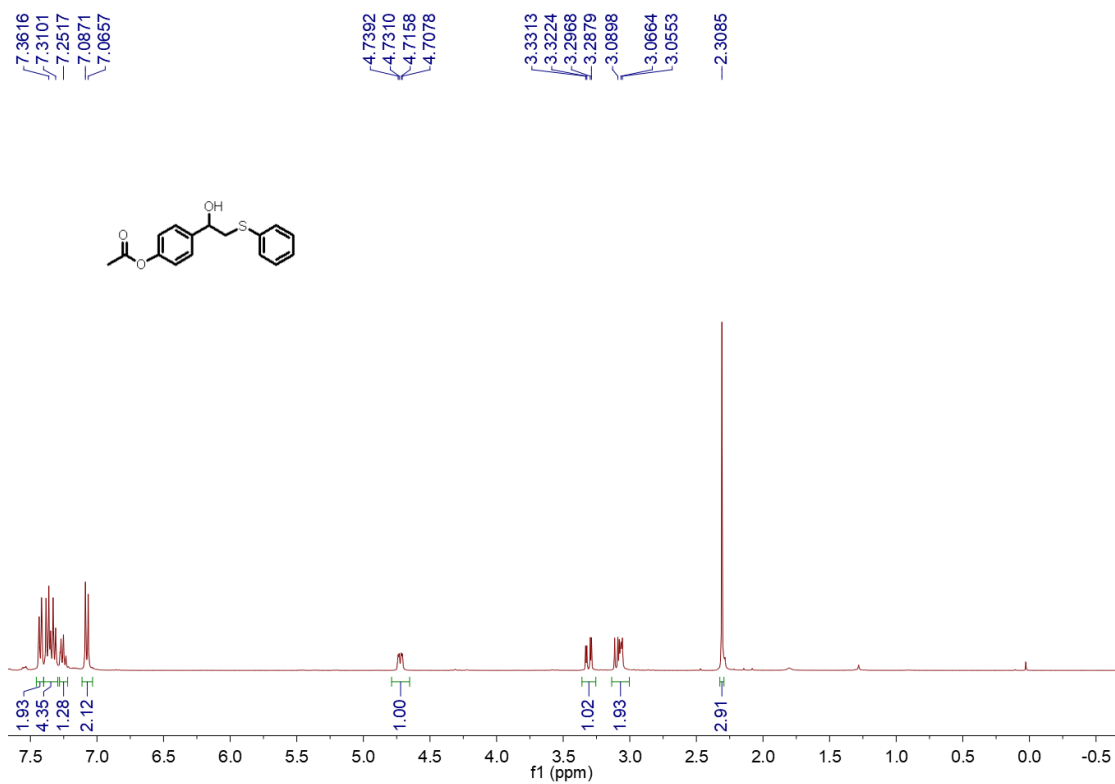



### <sup>13</sup>C NMR spectrum of c28

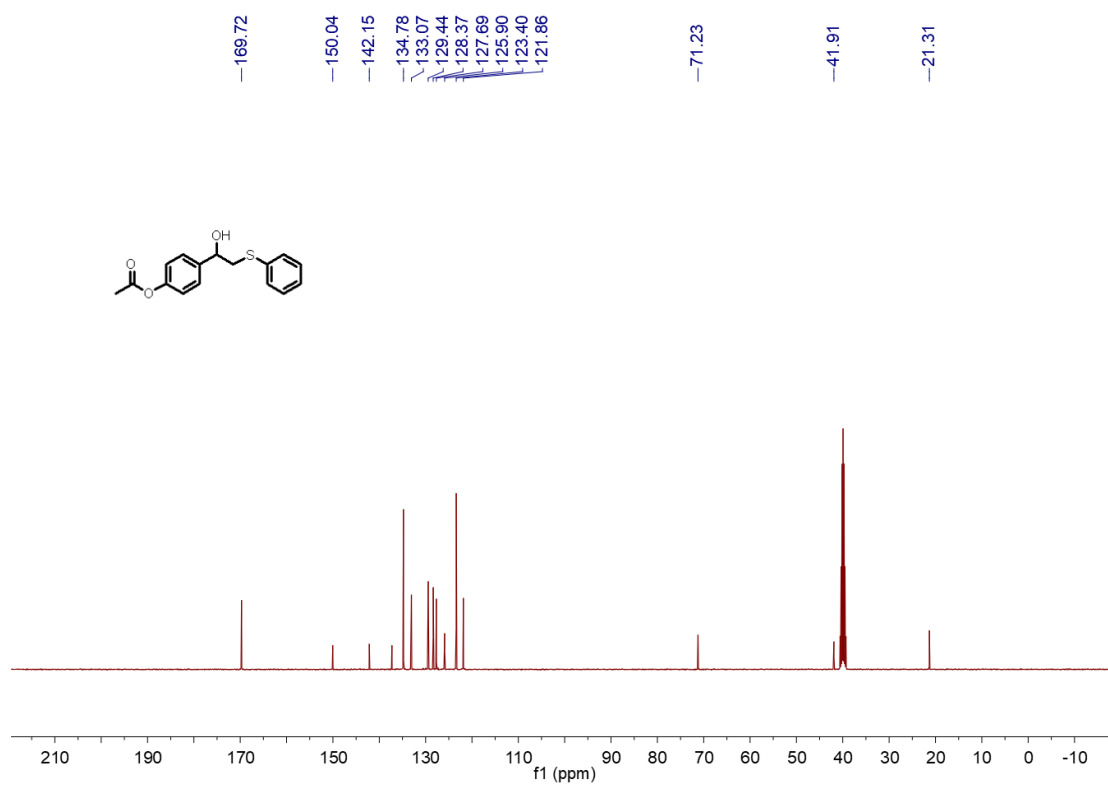

### <sup>1</sup>H NMR spectrum of c29

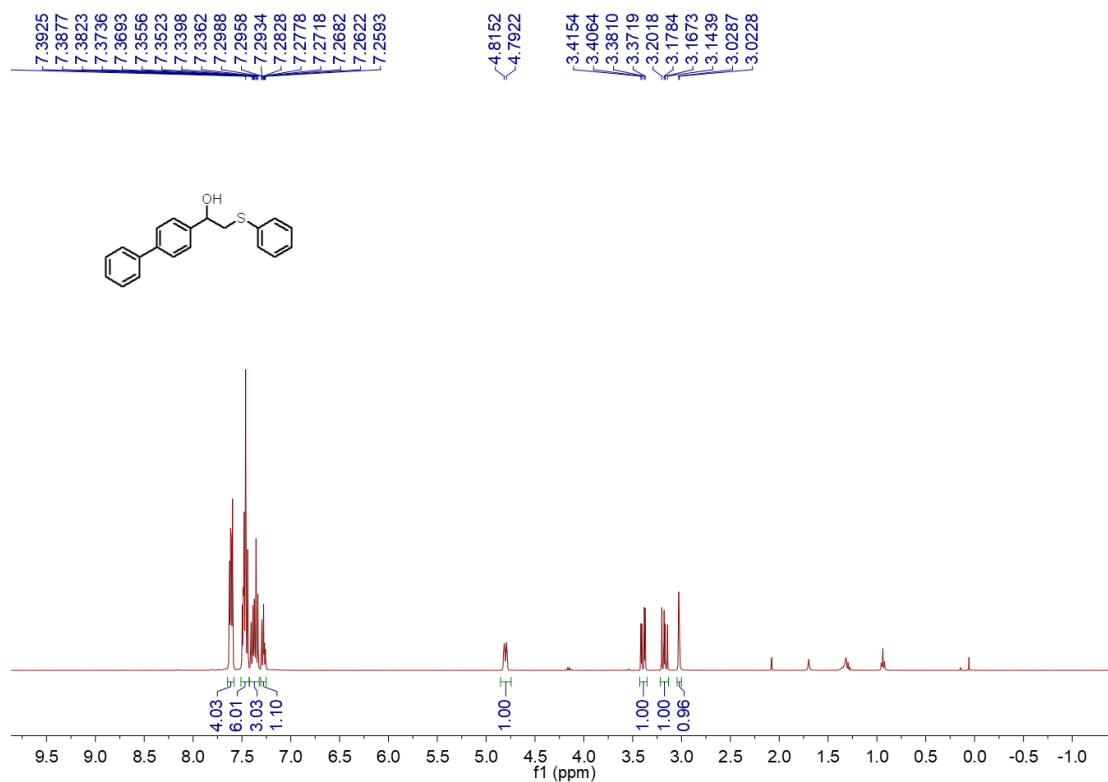

### <sup>13</sup>C NMR spectrum of c29

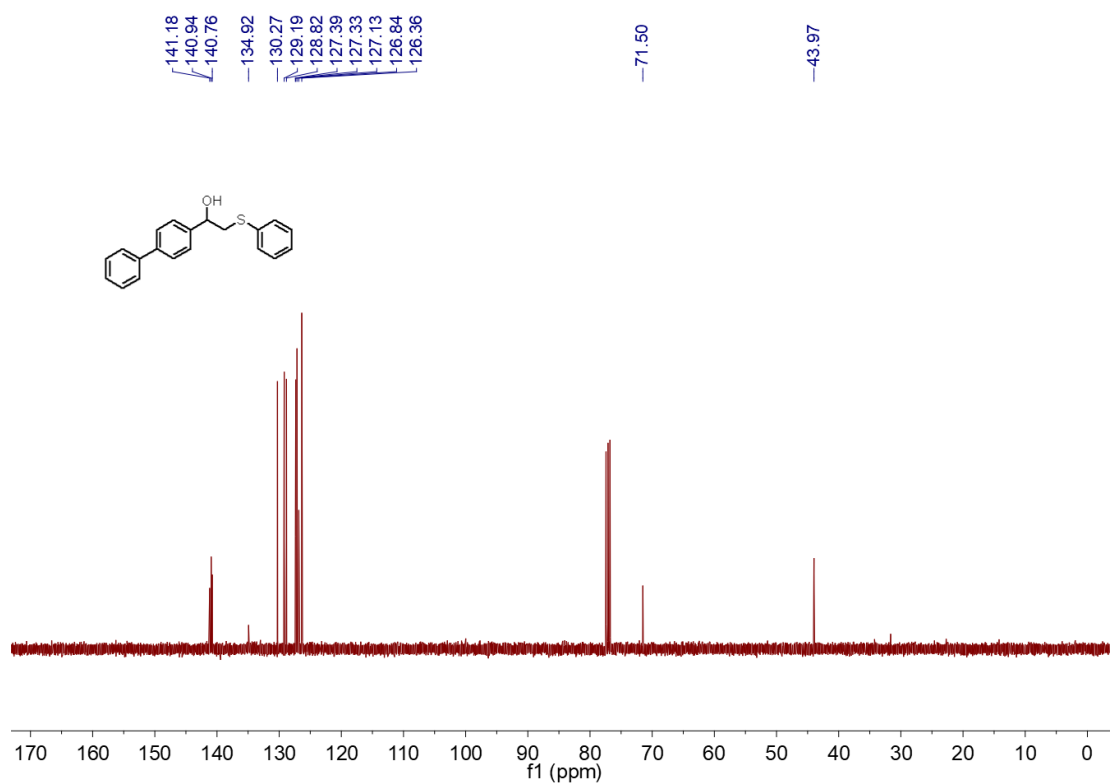

### <sup>1</sup>H NMR spectrum of c30

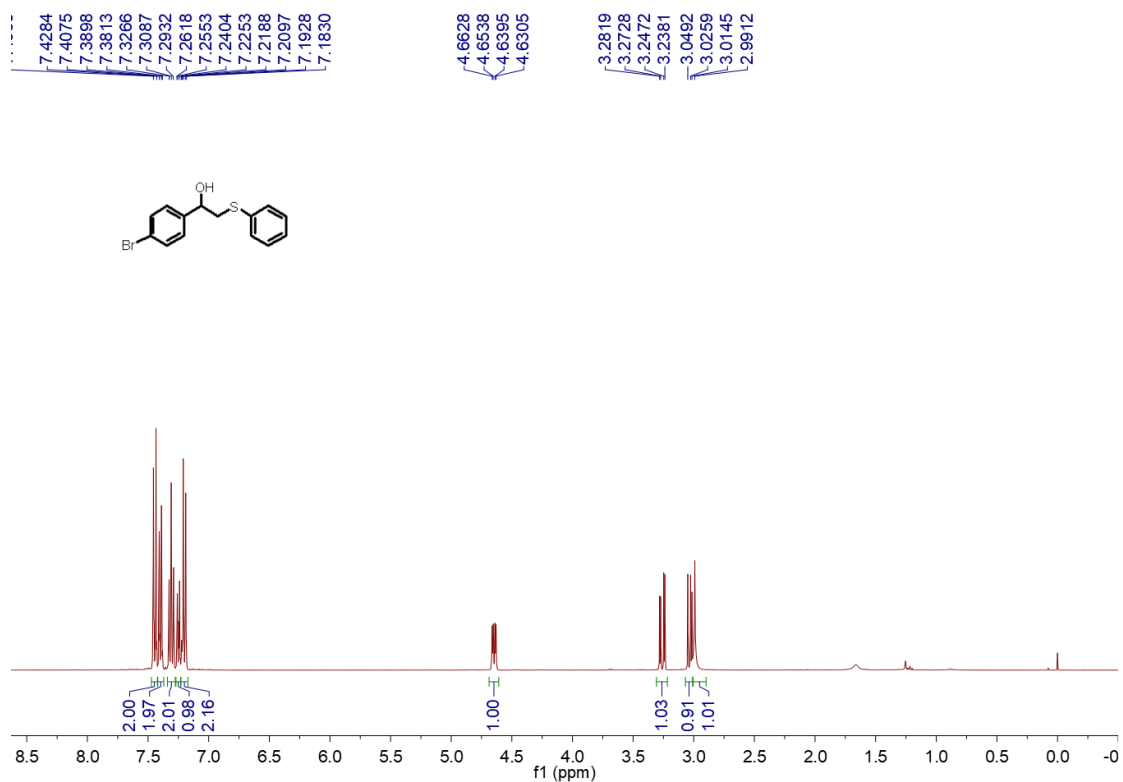

### <sup>13</sup>C NMR spectrum of c30

141.12  
130.44  
129.23  
127.60  
127.02  
121.77

71.02

44.05

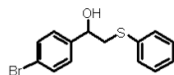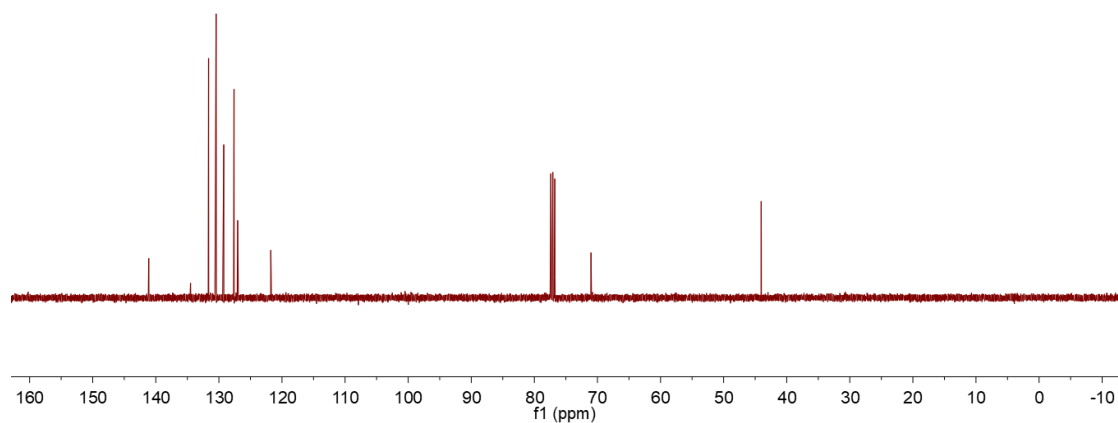

### <sup>1</sup>H NMR spectrum of c34

7.4701  
7.4666  
7.4513  
7.4489  
7.4472  
7.4460  
7.3426  
7.3404  
7.3326  
7.3261  
7.3224  
7.3186  
7.3100  
7.3069  
7.3029  
7.2574  
7.2377  
7.1180  
7.1120  
7.1105  
7.1029  
7.0944  
7.0875  
7.0784

3.5066  
3.4741  
3.3172  
3.2847  
2.8707

2.3513

1.6249

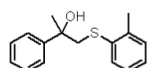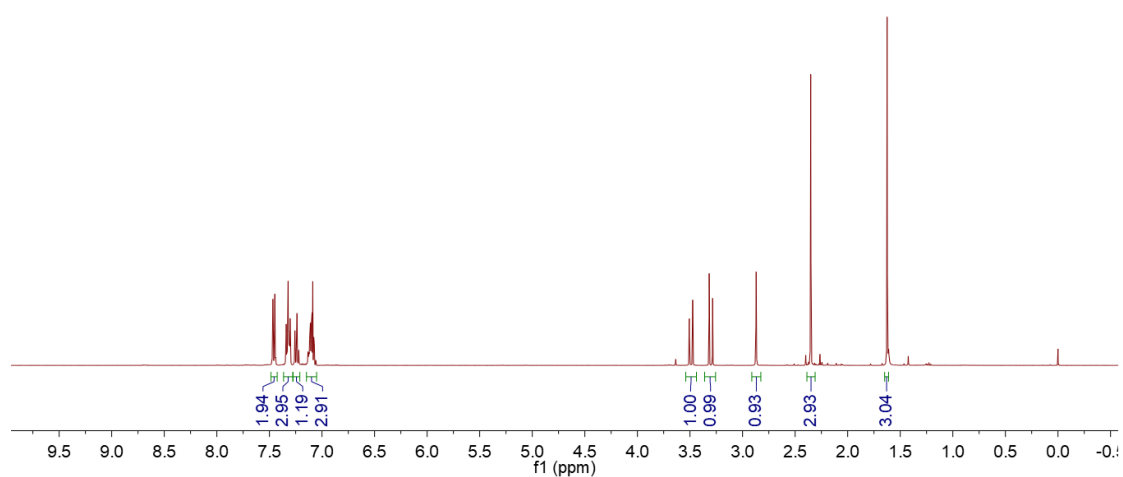

### <sup>13</sup>C NMR spectrum of c34

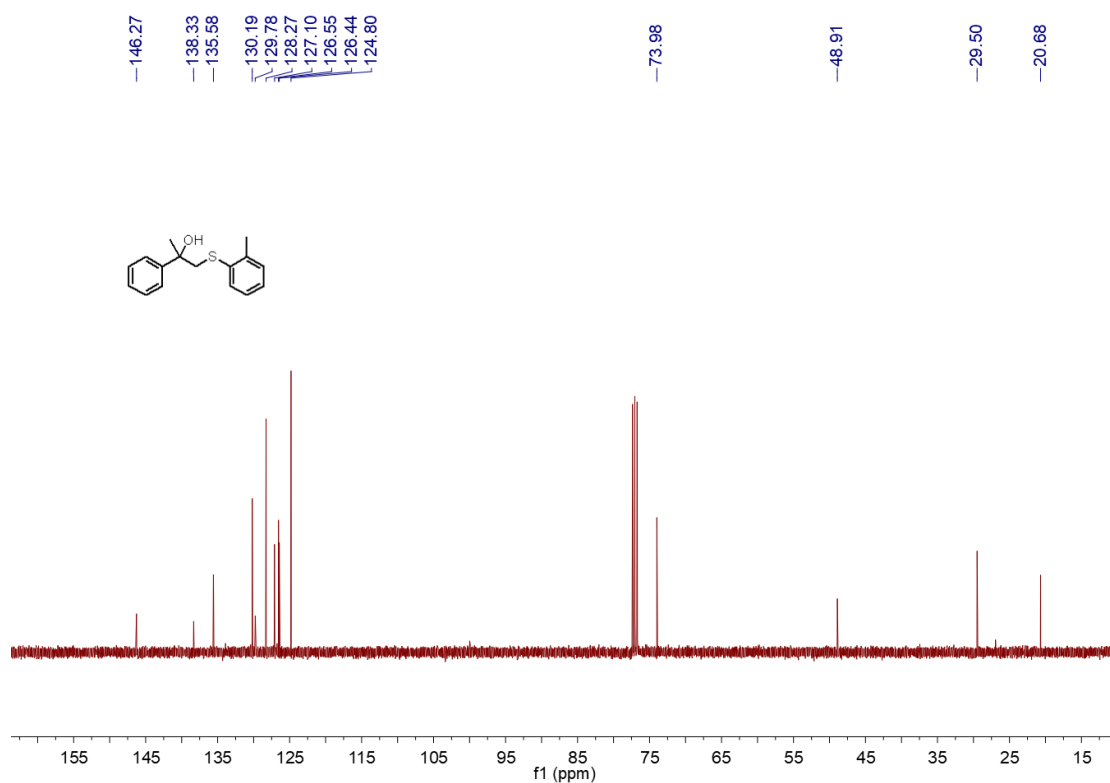

### <sup>1</sup>H NMR spectrum of c35

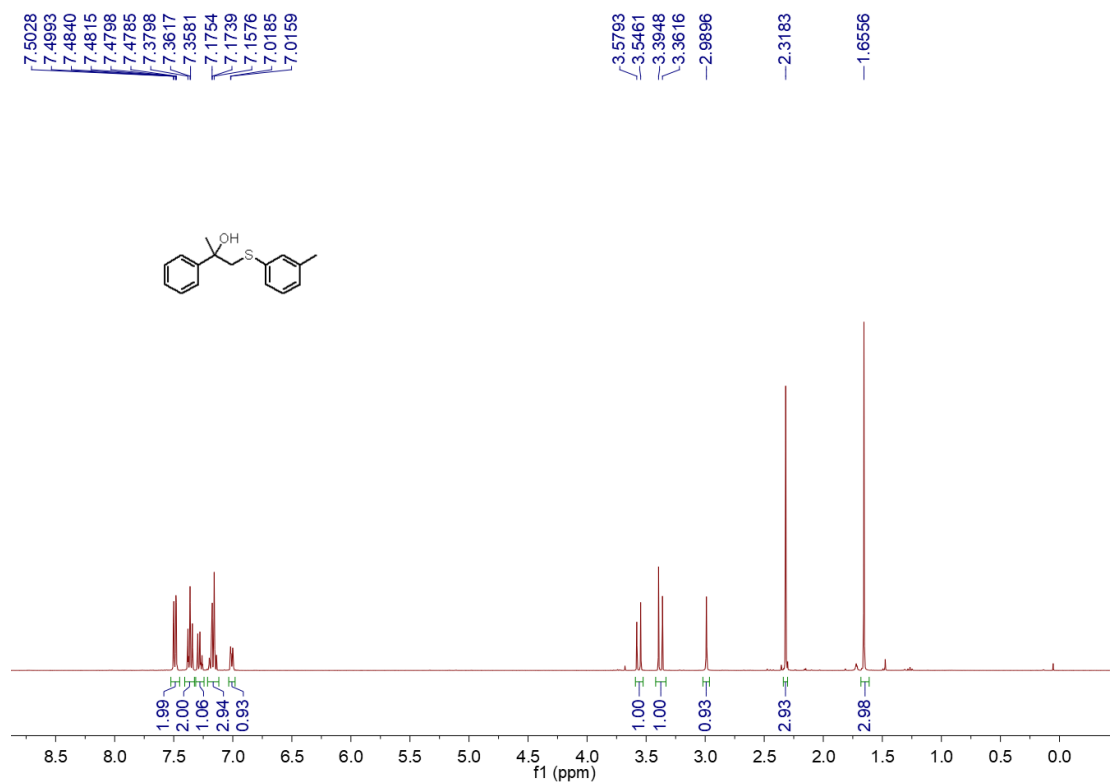

### <sup>13</sup>C NMR spectrum of c35

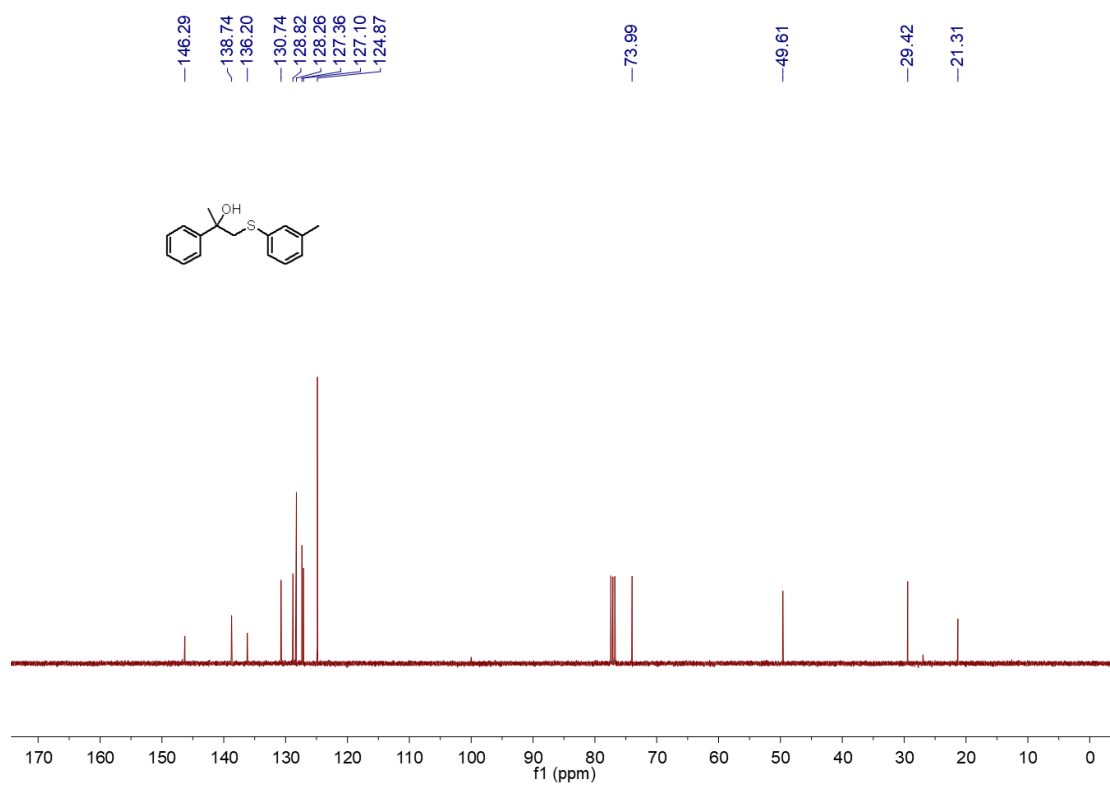

### <sup>1</sup>H NMR spectrum of c36

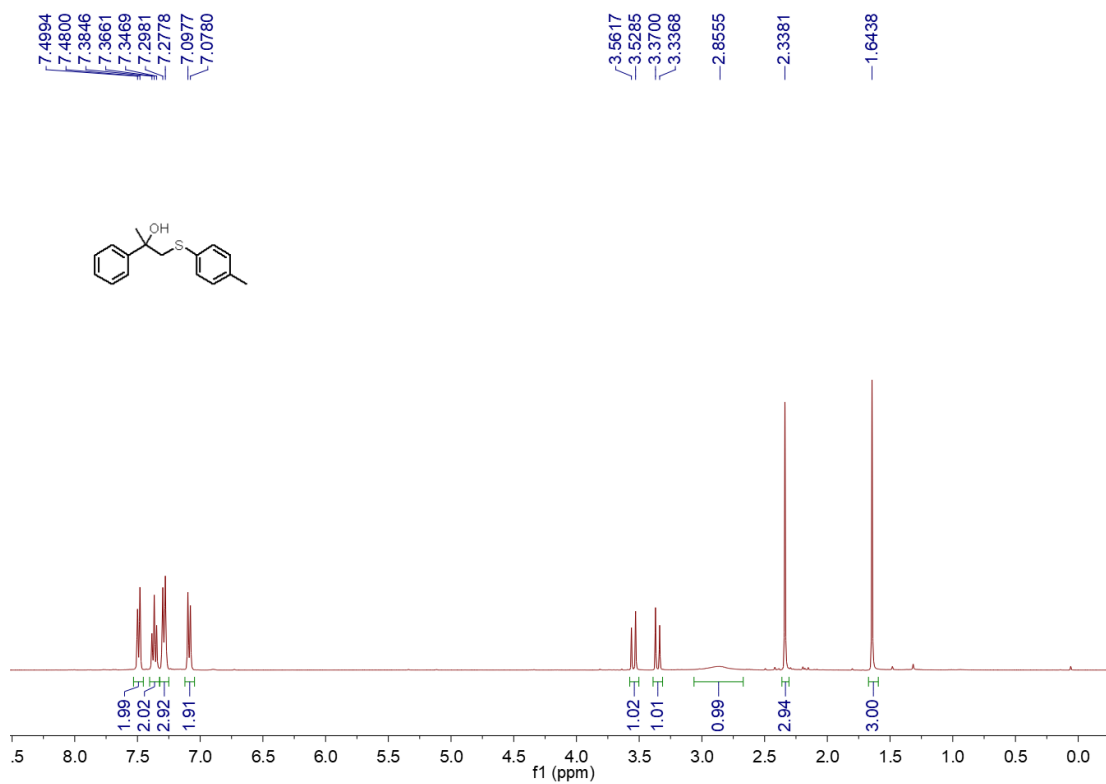

### <sup>13</sup>C NMR spectrum of c36

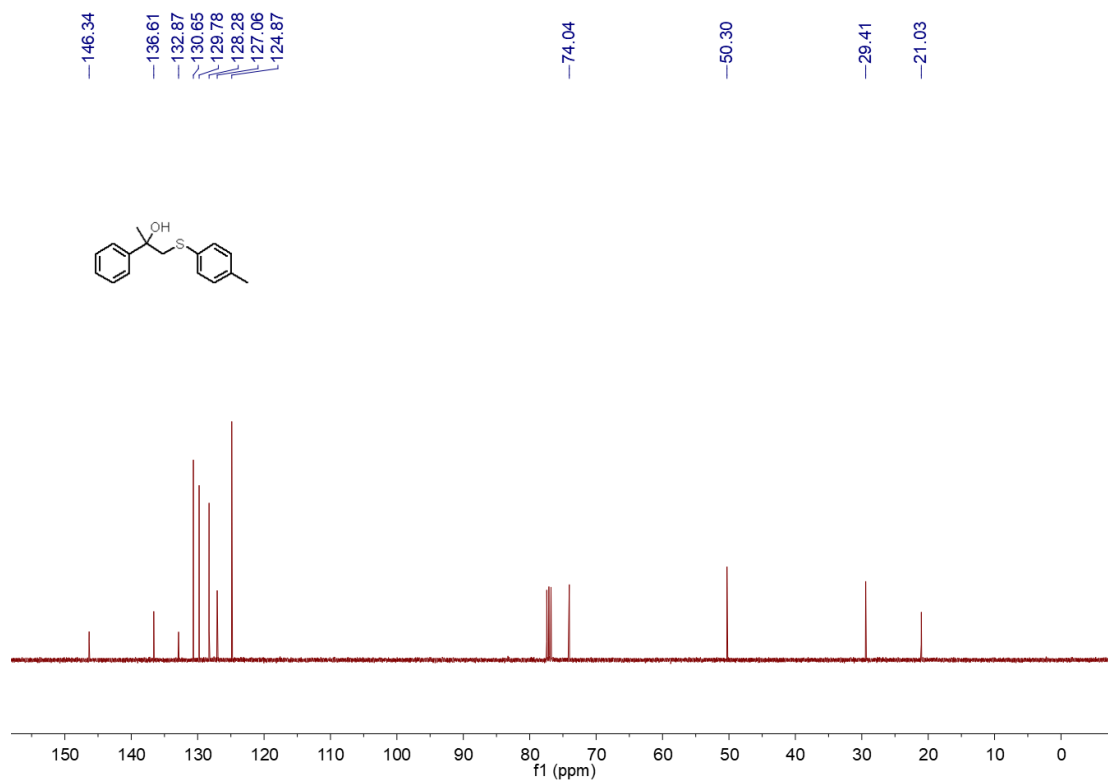

### <sup>1</sup>H NMR spectrum of c37

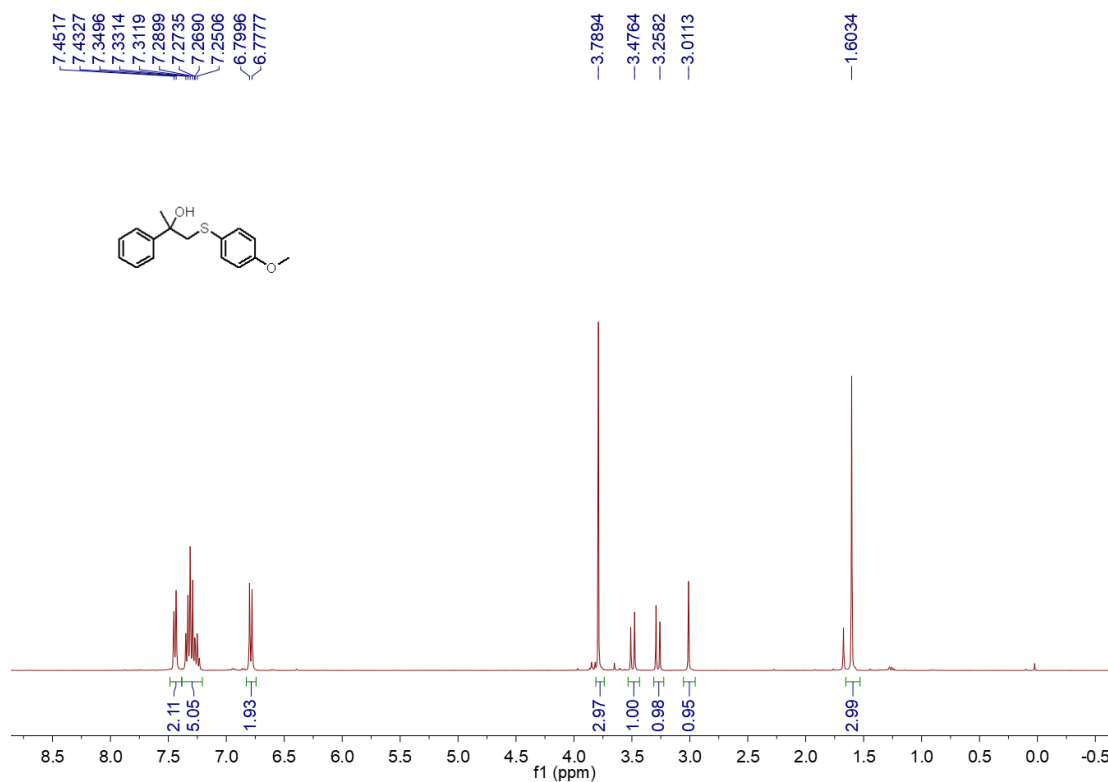

### <sup>13</sup>C NMR spectrum of c37

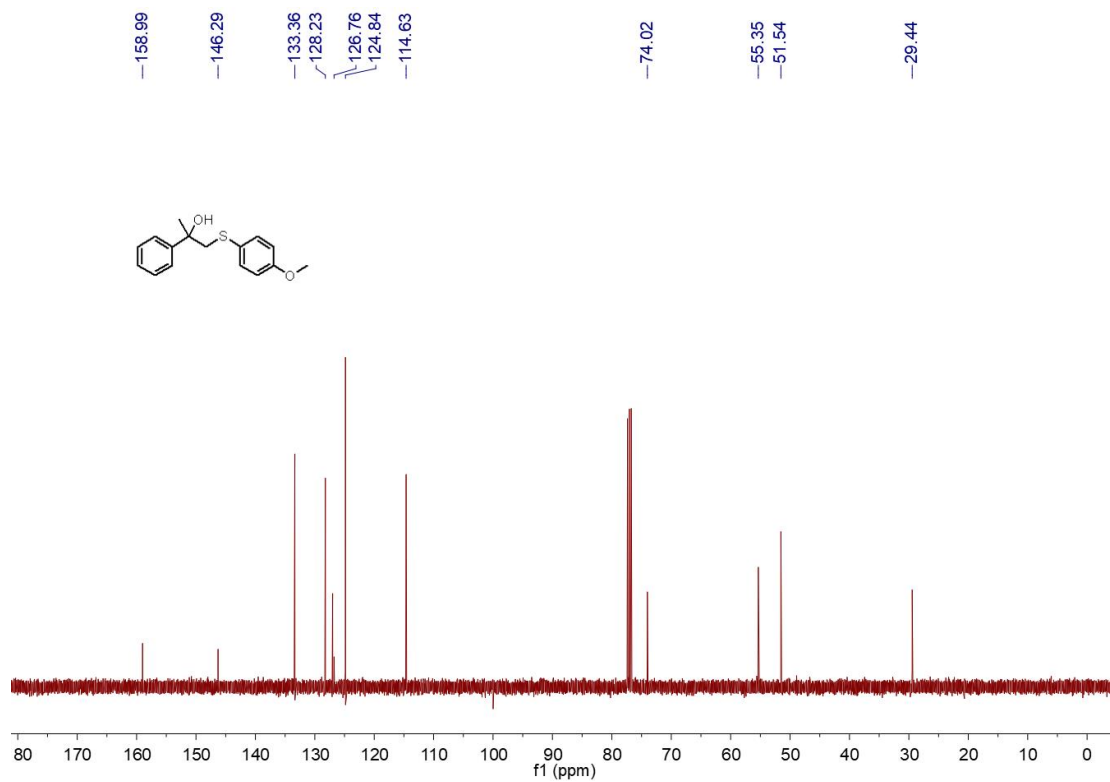

### <sup>1</sup>H NMR spectrum of c38

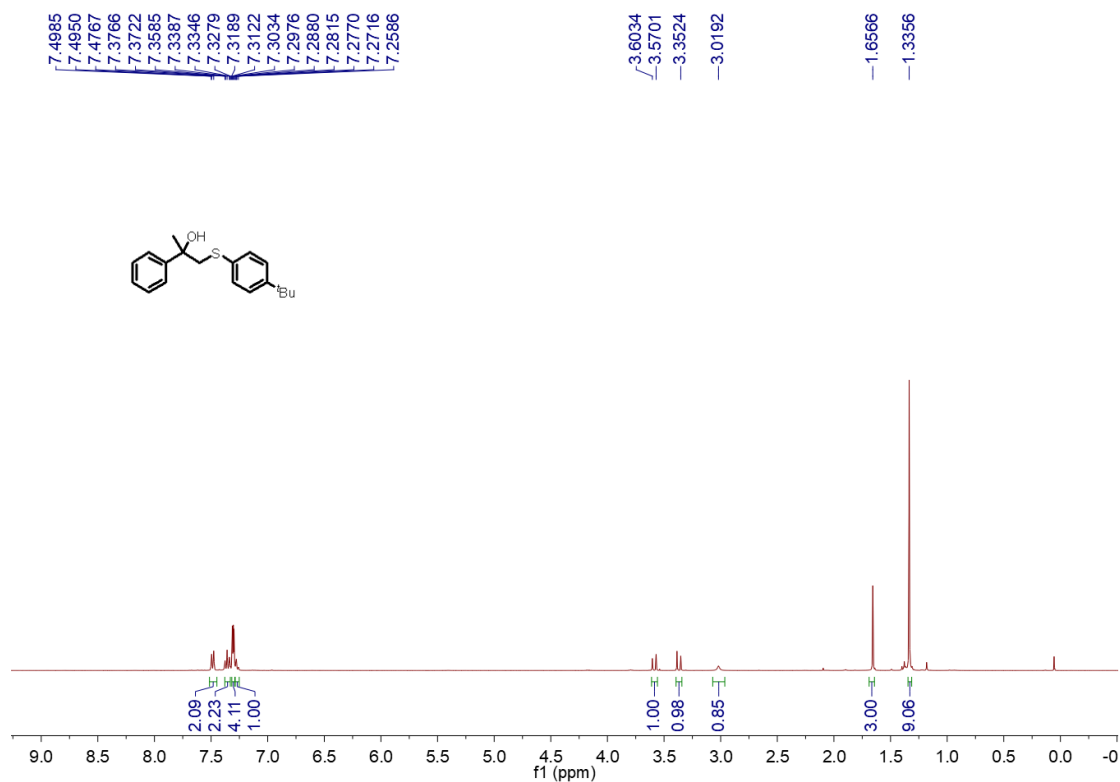

### <sup>13</sup>C NMR spectrum of c38

149.84  
146.28  
132.81  
130.33  
128.29  
127.08  
124.88

73.99

50.09

34.51  
31.30  
29.52

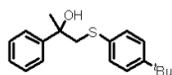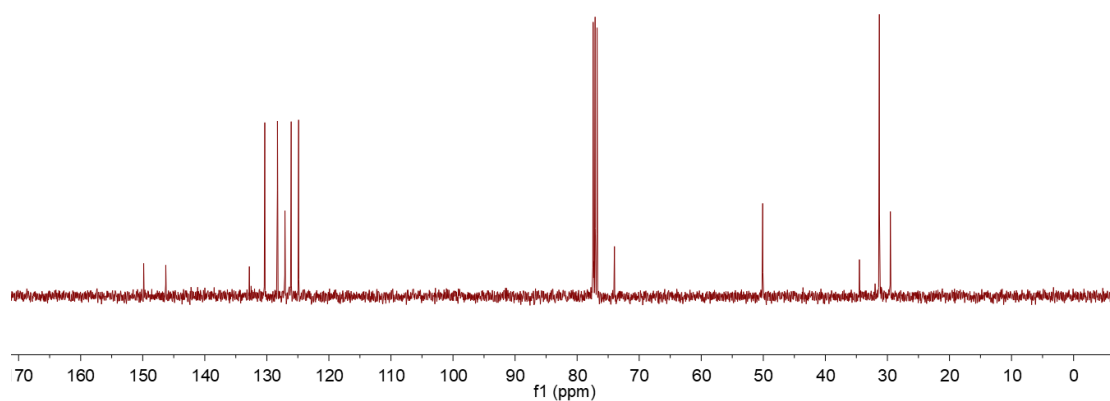

### <sup>1</sup>H NMR spectrum of c39

7.5958  
7.5922  
7.5873  
7.5842  
7.5746  
7.5489  
7.5167  
7.5132  
7.5047  
7.4994  
7.4952  
7.4929  
7.4880  
7.4835  
7.4785  
7.4695  
7.4494  
7.4404  
7.4353  
7.4301  
7.4189  
7.4141  
7.4088  
7.3993  
7.3895  
7.3857  
7.3802  
7.3705  
7.3668  
7.3621  
7.3547  
7.3509  
7.3075  
7.3044  
7.2892  
7.2775  
3.6322  
3.5989  
3.4362  
3.4029  
2.9646  
1.6814

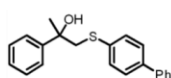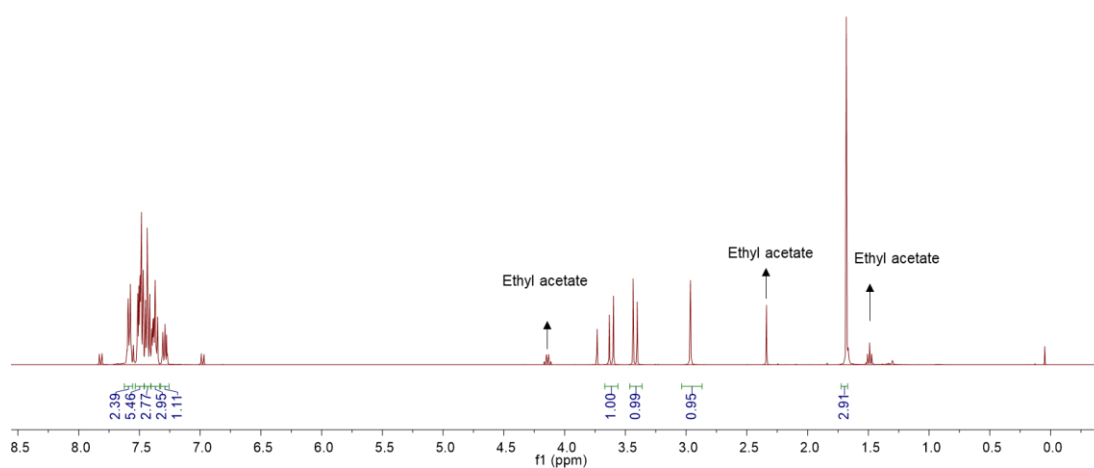



### <sup>13</sup>C NMR spectrum of c39

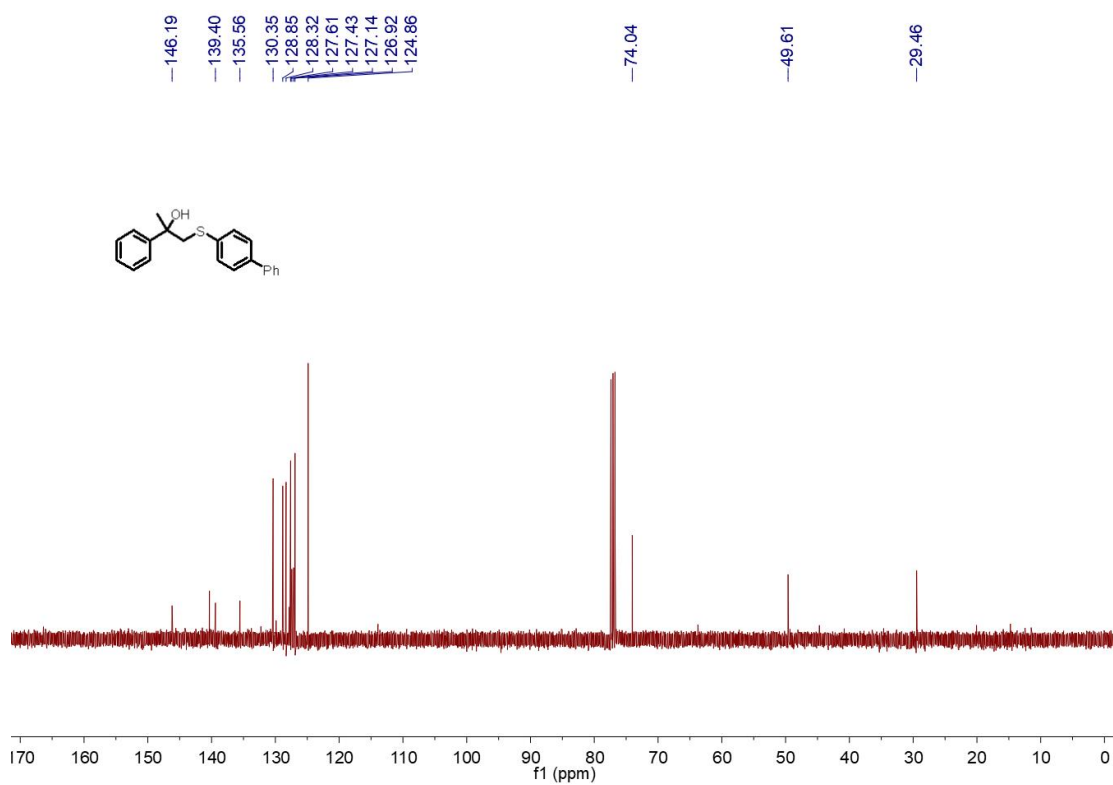

### <sup>1</sup>H NMR spectrum of c40

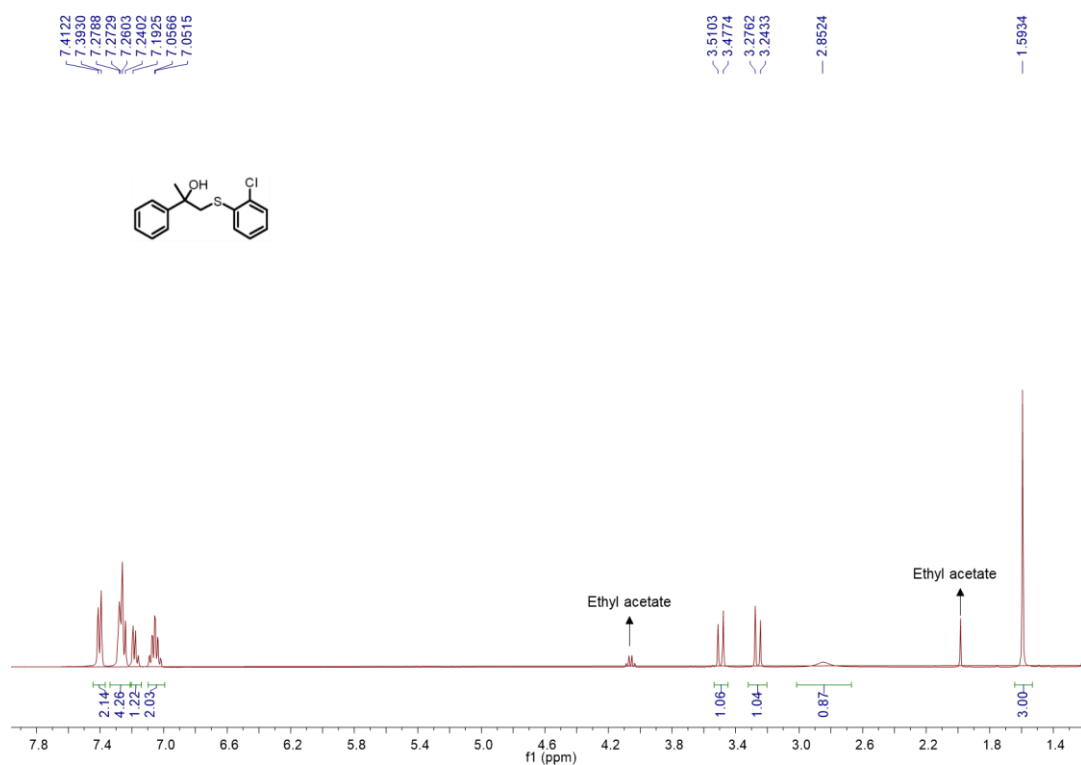

### <sup>13</sup>C NMR spectrum of c40

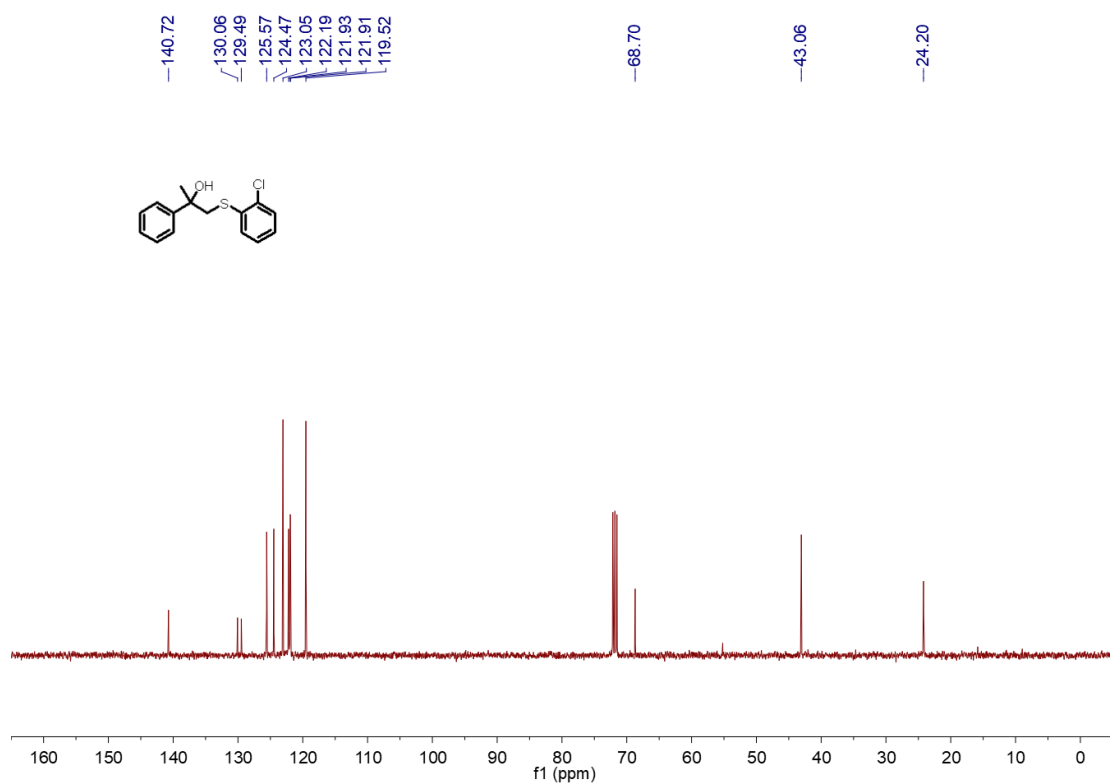

### <sup>1</sup>H NMR spectrum of c41

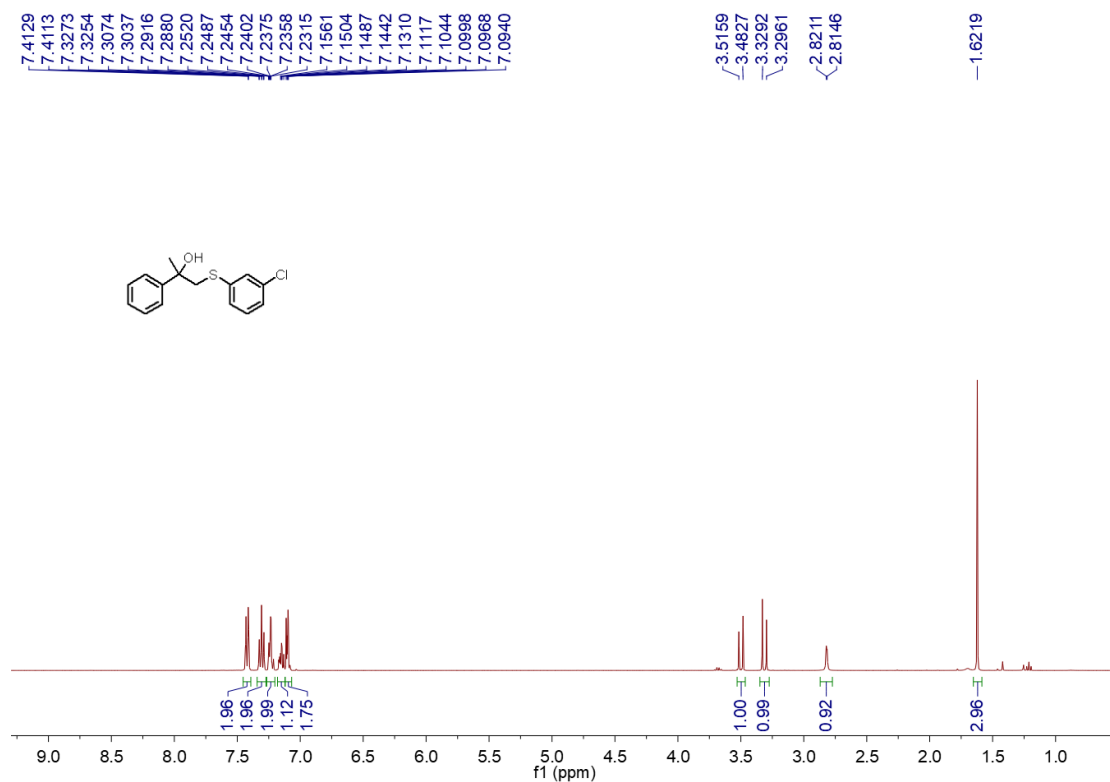

### <sup>13</sup>C NMR spectrum of c41

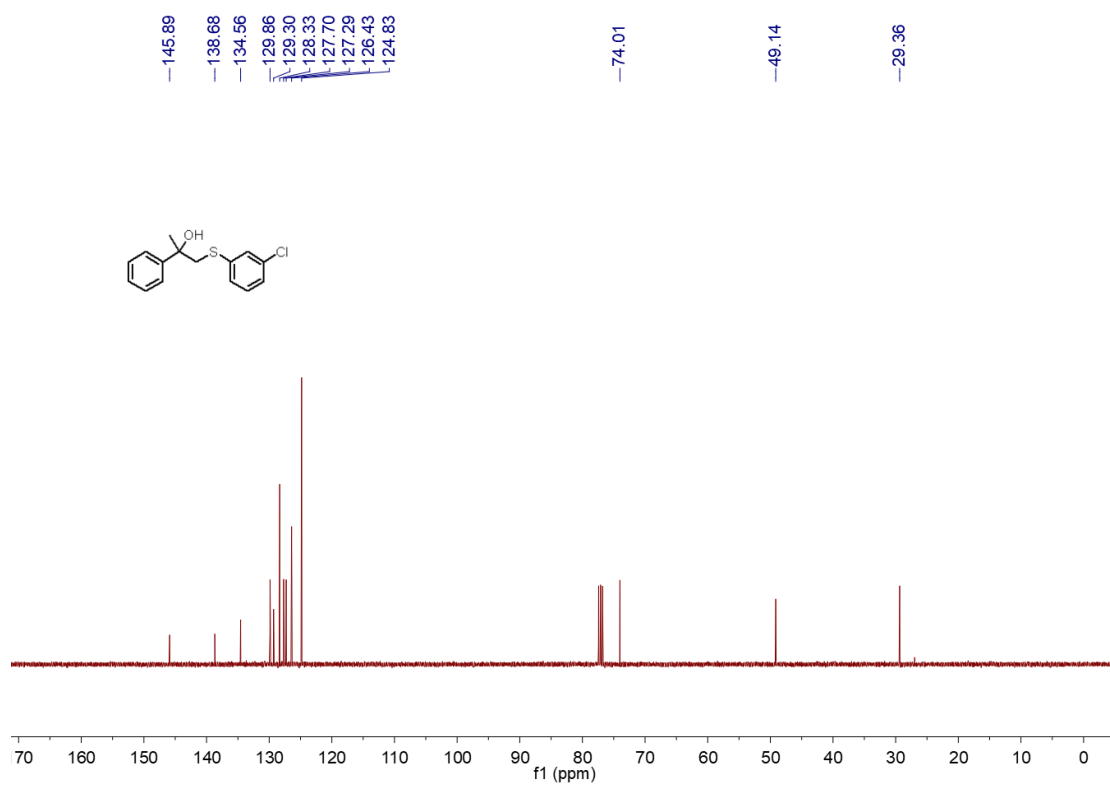

### <sup>1</sup>H NMR spectrum of c42

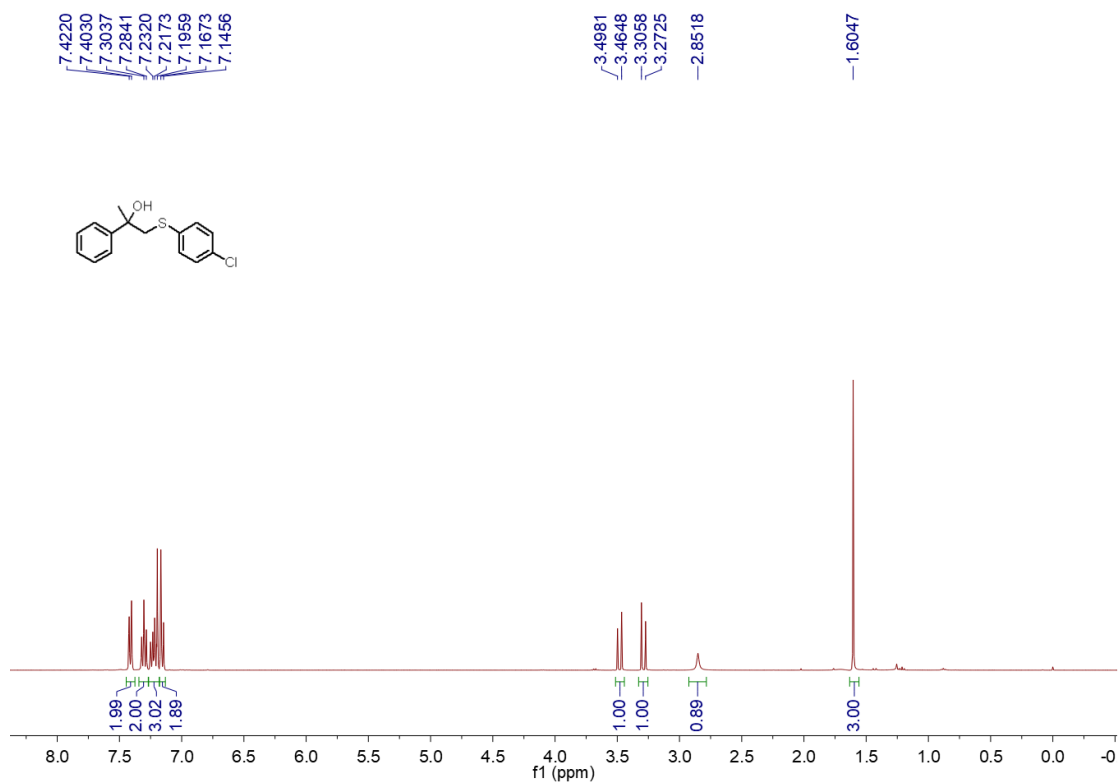

### <sup>13</sup>C NMR spectrum of c42

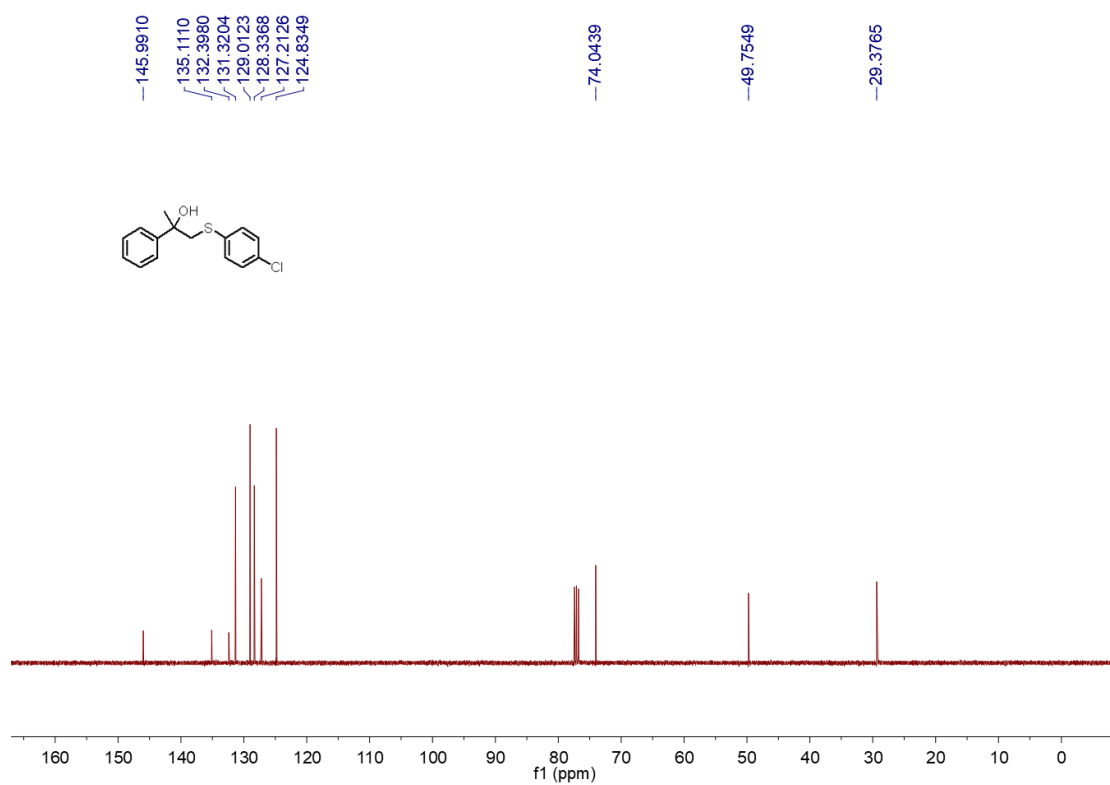

### <sup>1</sup>H NMR spectrum of c43

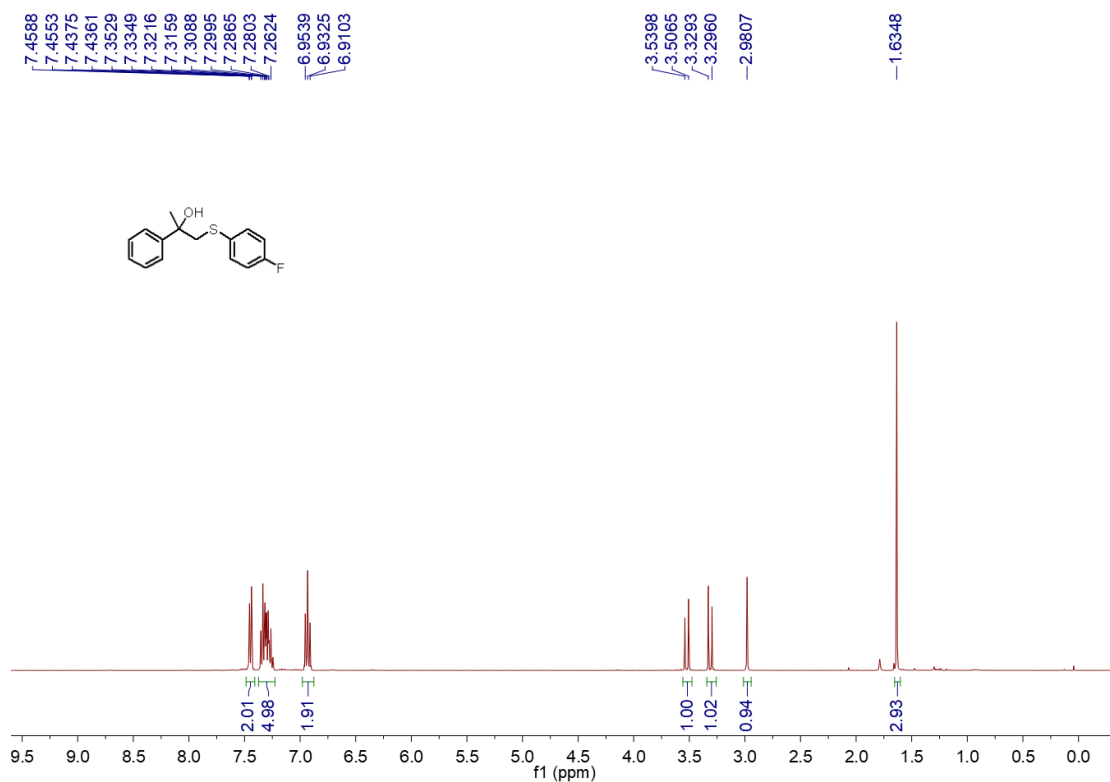

### <sup>13</sup>C NMR spectrum of c43

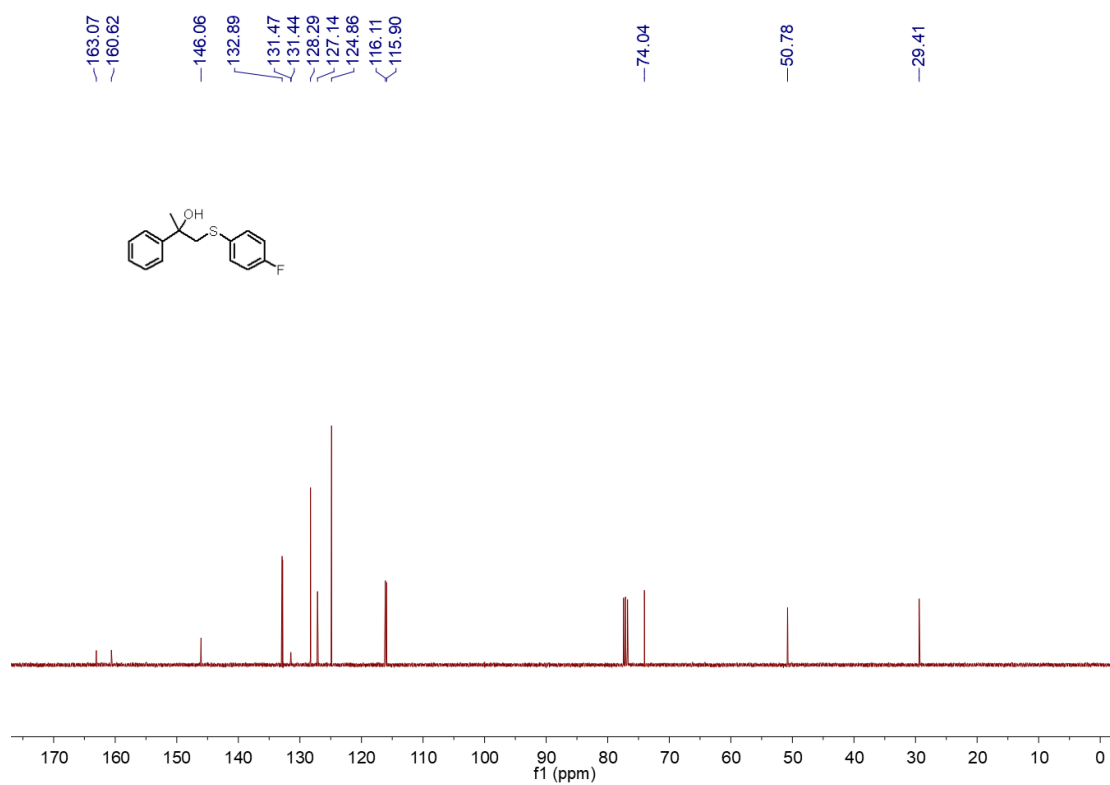

### <sup>19</sup>F NMR spectrum of c43

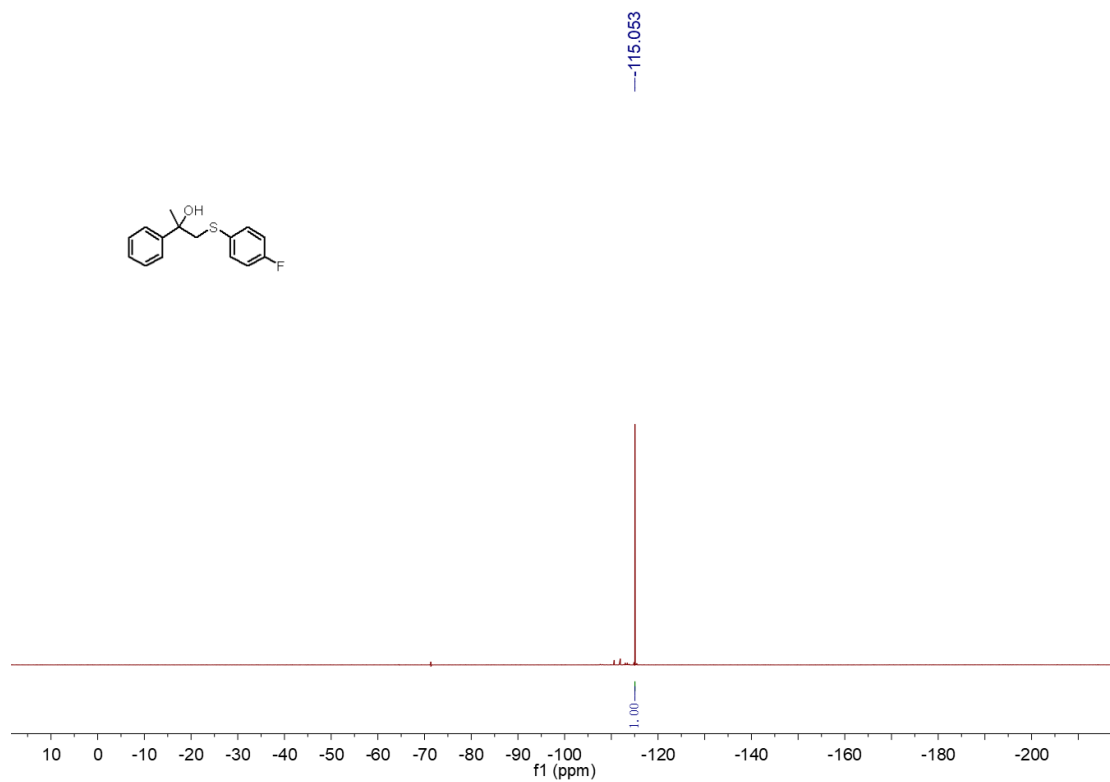

### <sup>1</sup>H NMR spectrum of c44

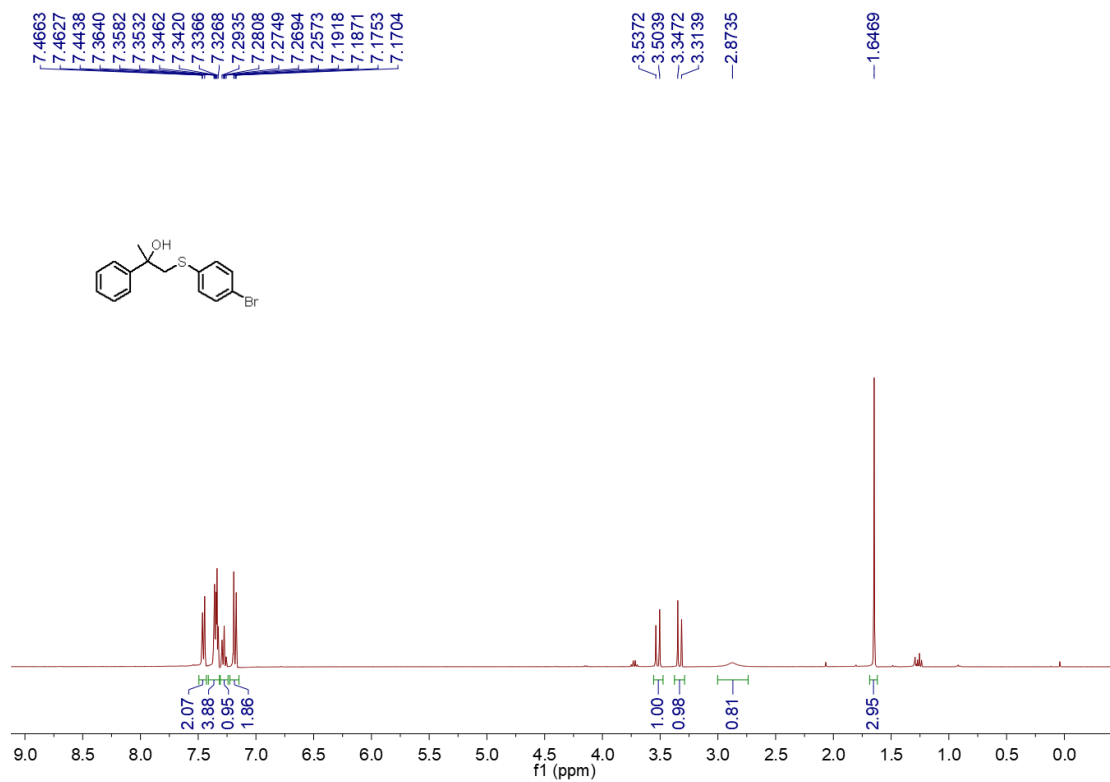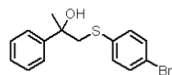

### <sup>13</sup>C NMR spectrum of c44

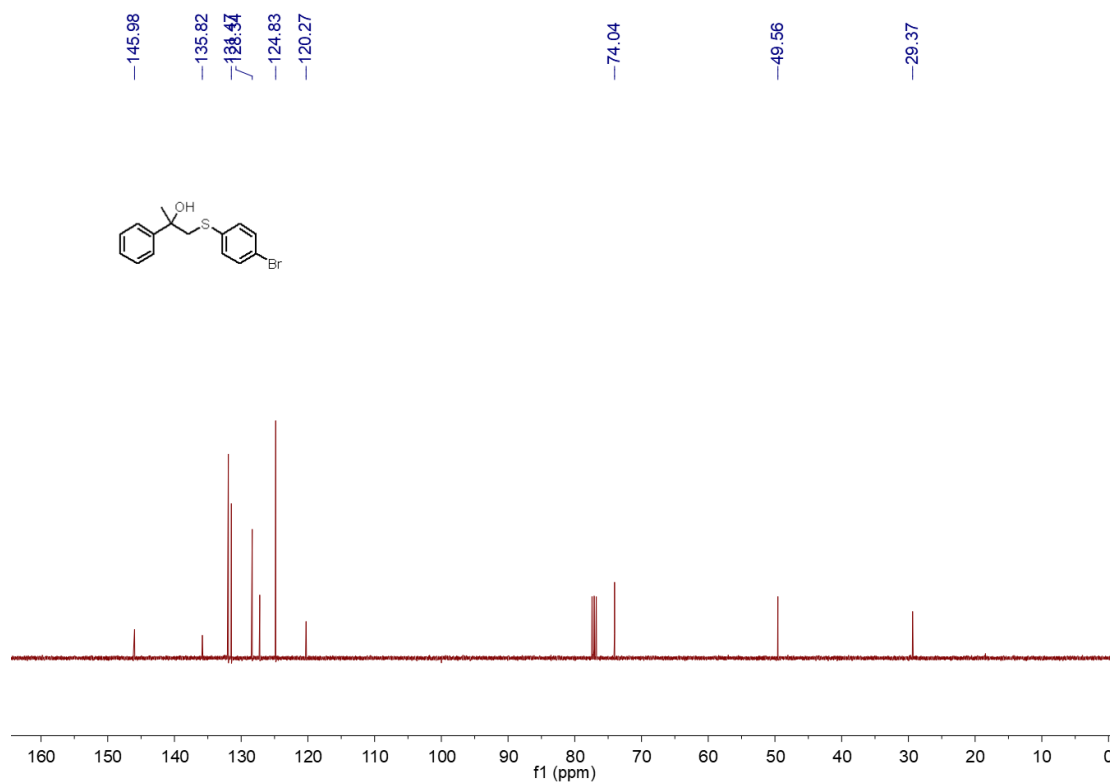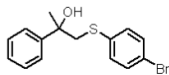

### <sup>1</sup>H NMR spectrum of c45

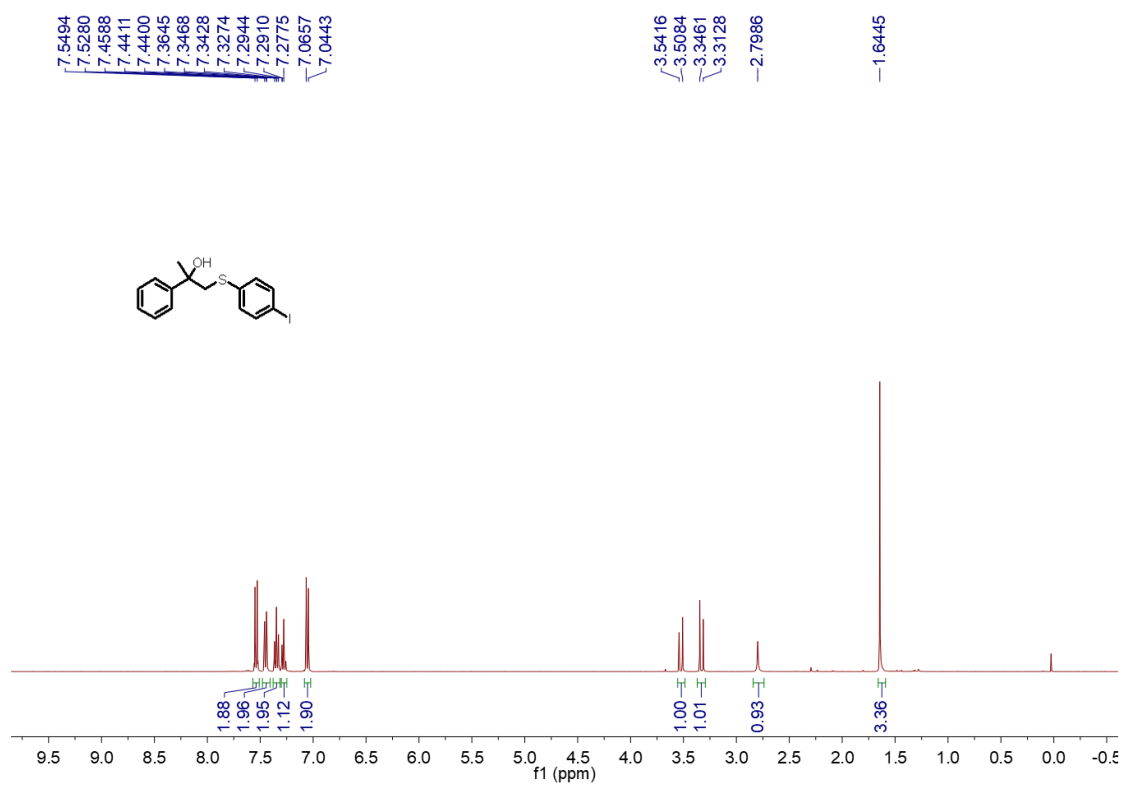

### <sup>13</sup>C NMR spectrum of c45

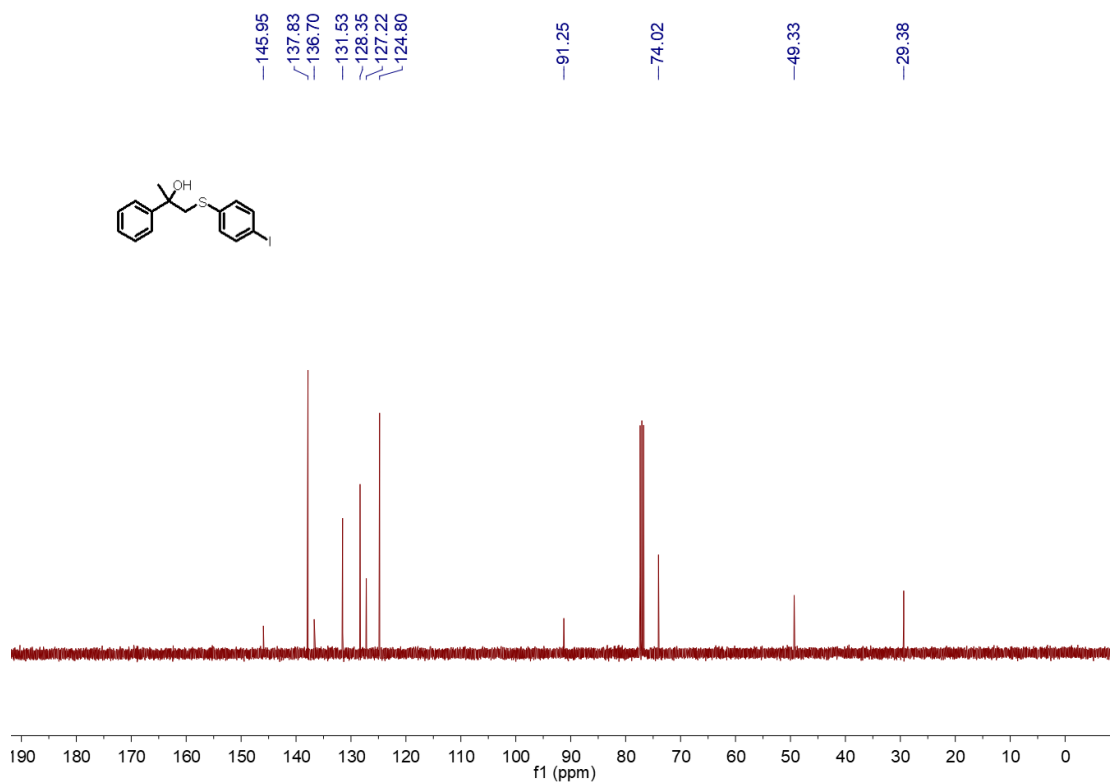

### <sup>1</sup>H NMR spectrum of c46

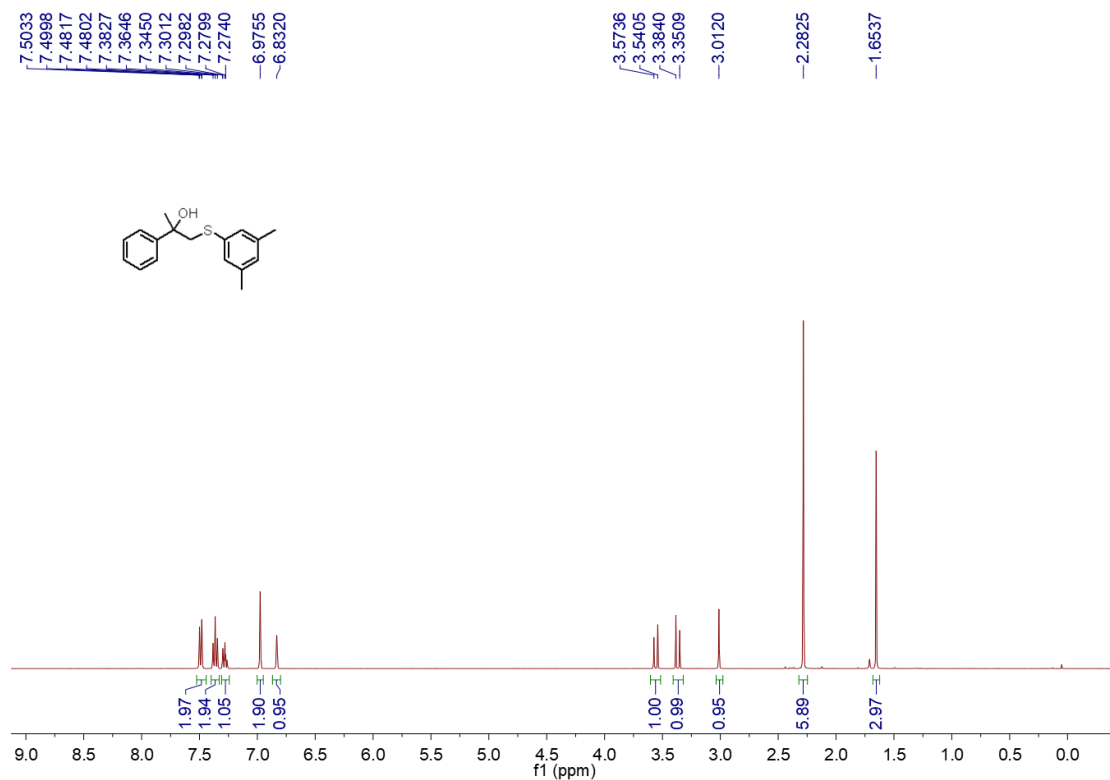

### <sup>13</sup>C NMR spectrum of c46

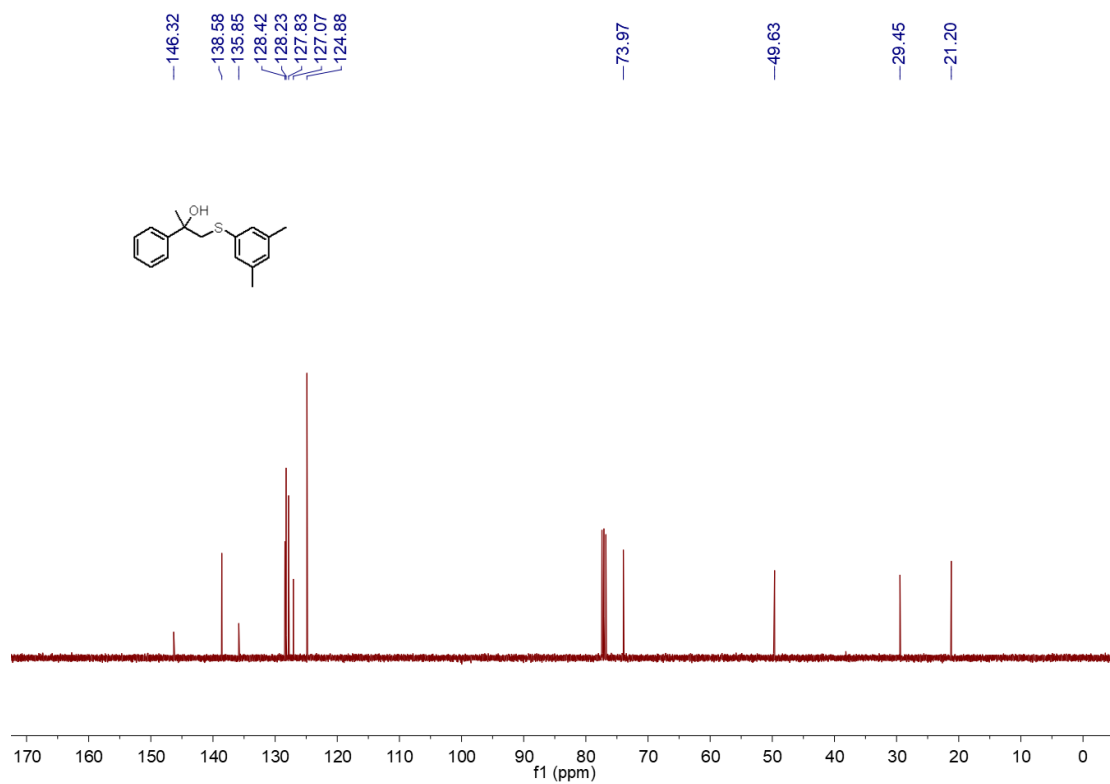



### <sup>1</sup>H NMR spectrum of c47

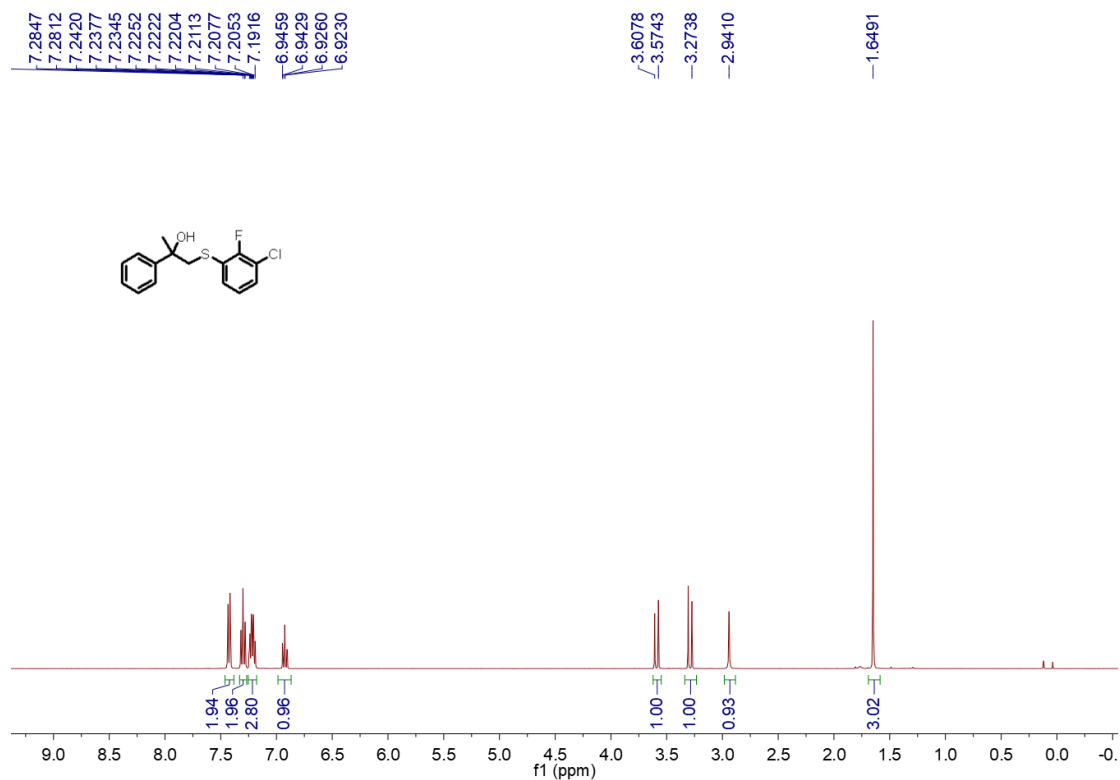

### <sup>13</sup>C NMR spectrum of c47

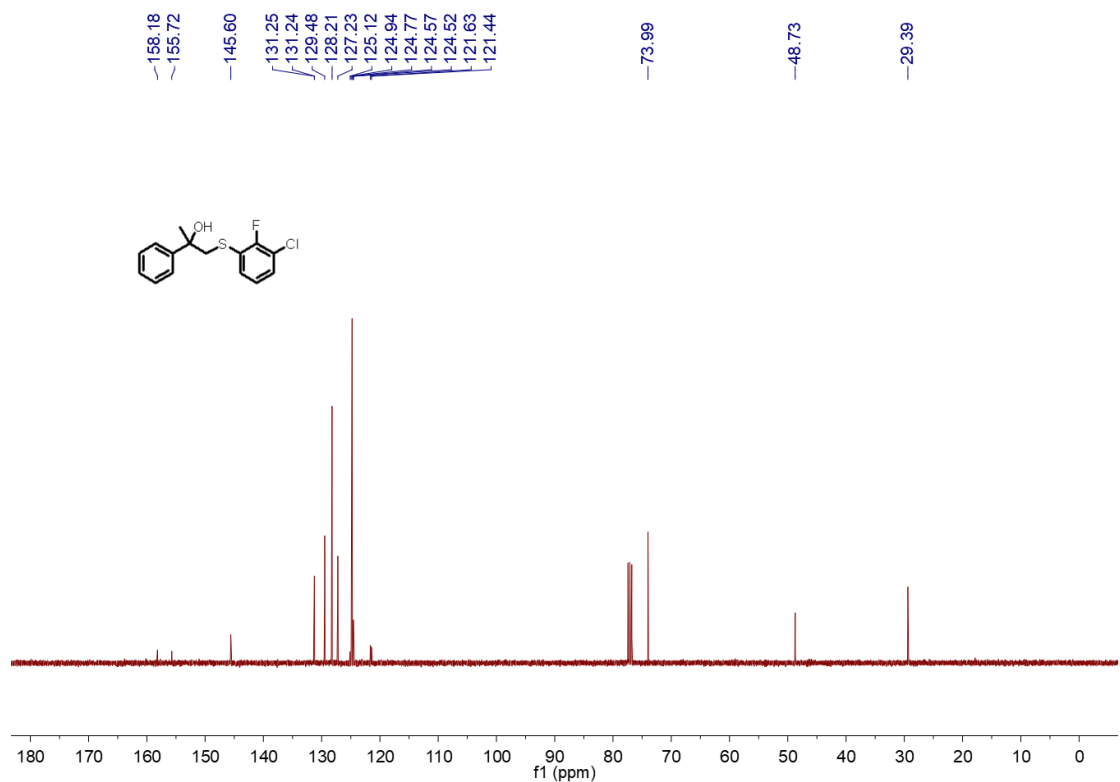

### <sup>19</sup>F NMR spectrum of c47

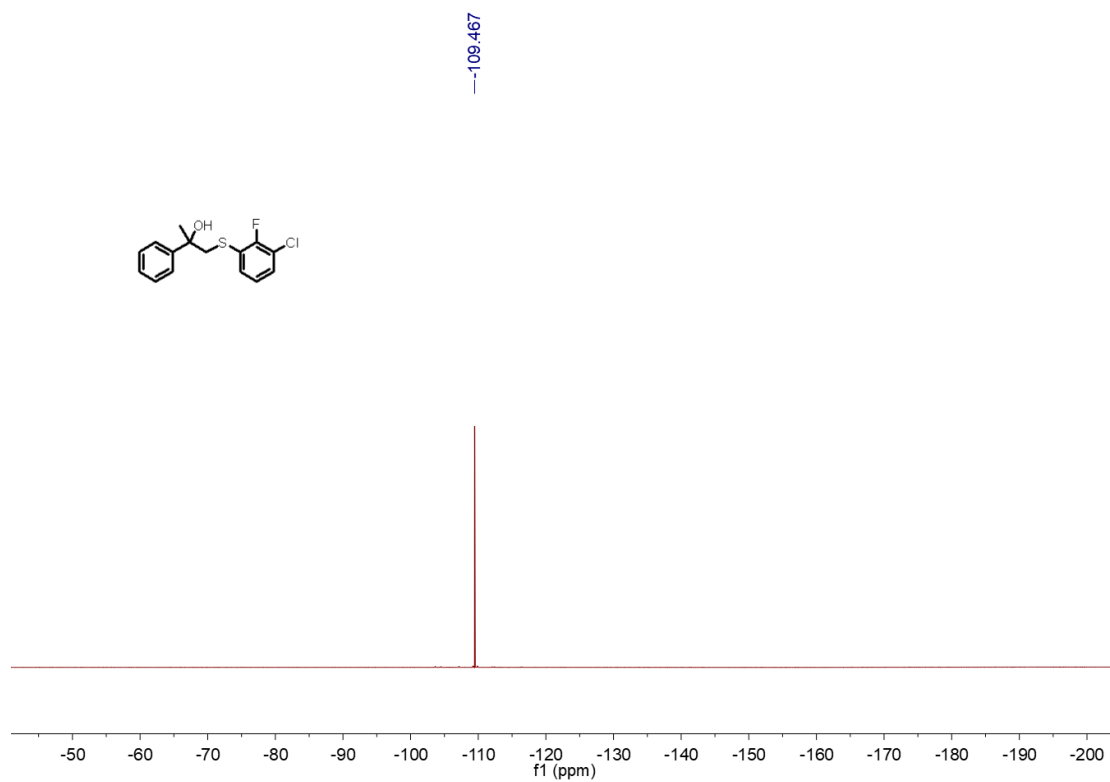

### <sup>1</sup>H NMR spectrum of c48

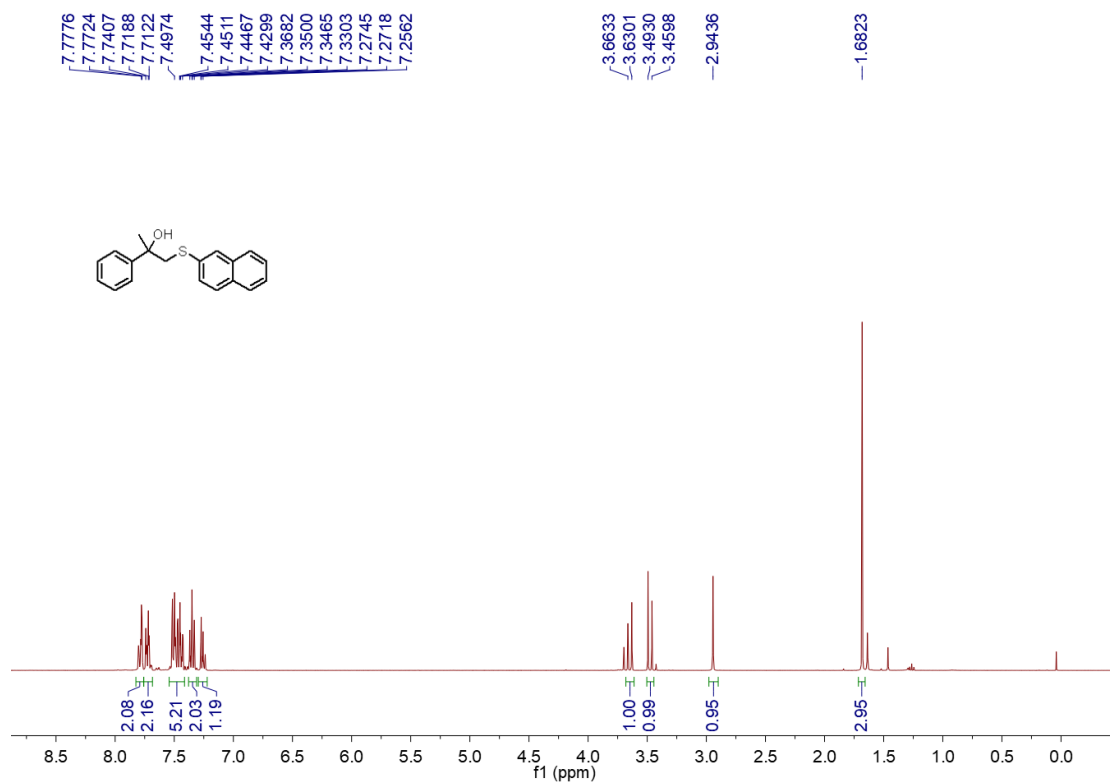

### <sup>13</sup>C NMR spectrum of c48

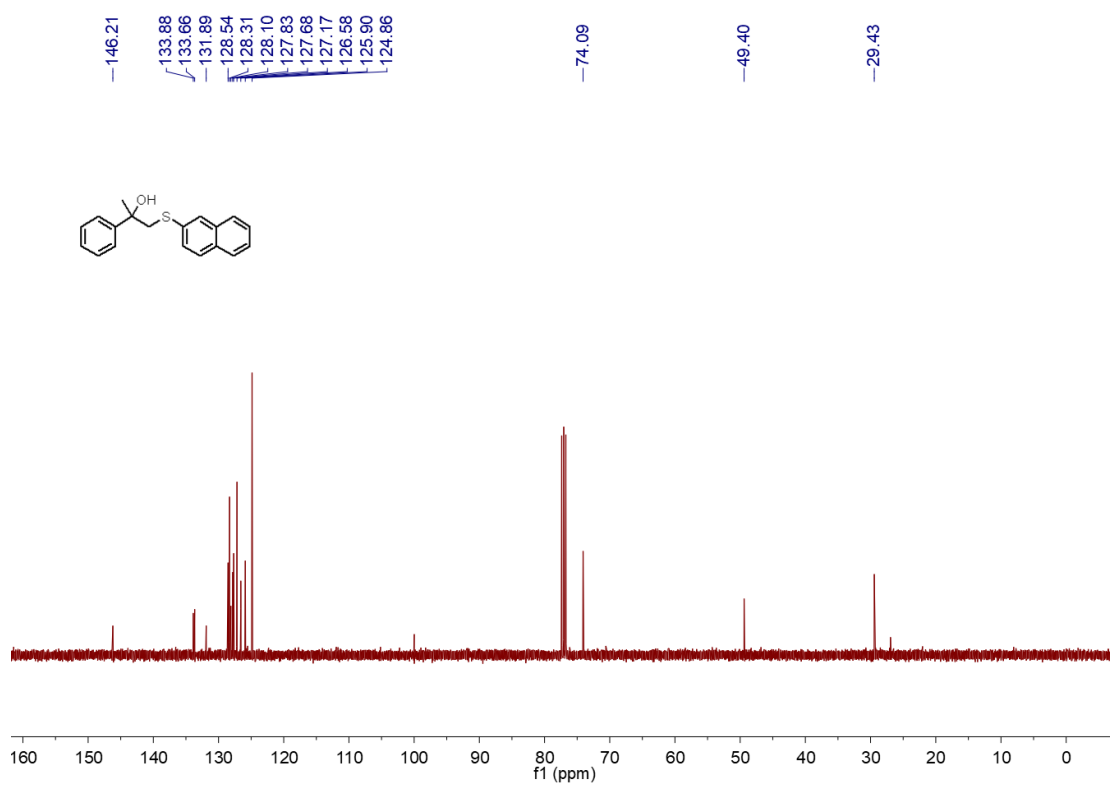

### <sup>1</sup>H NMR spectrum of c49

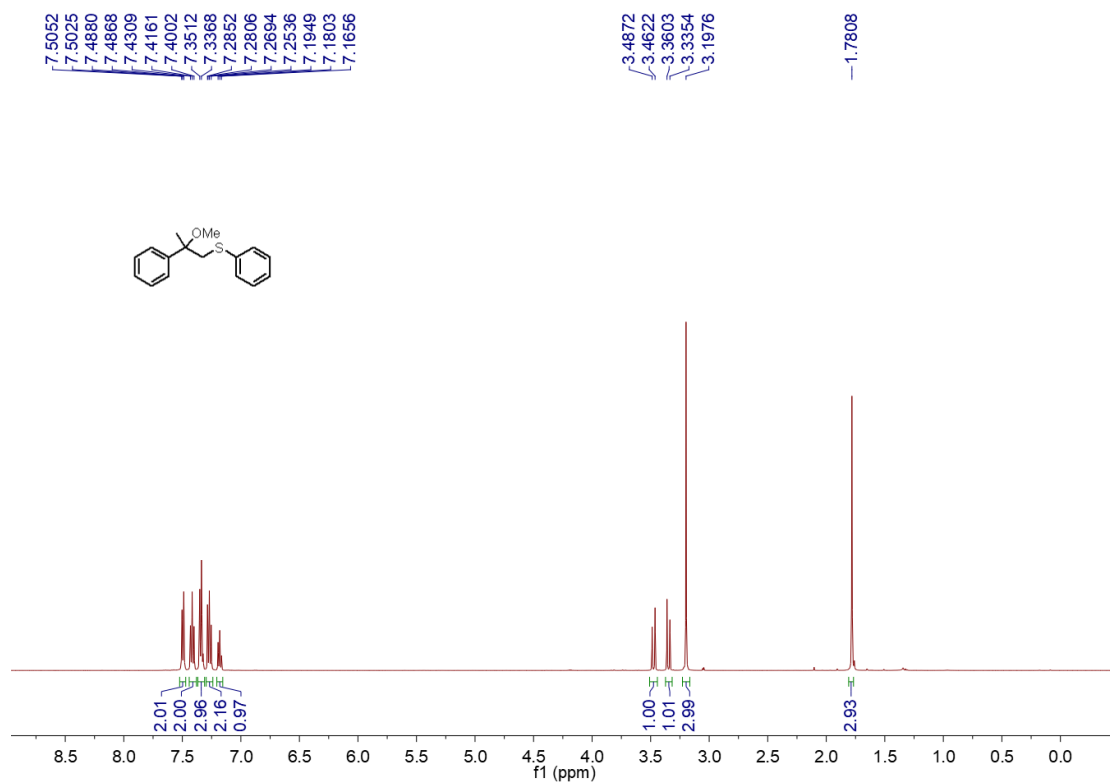

### <sup>13</sup>C NMR spectrum of c49

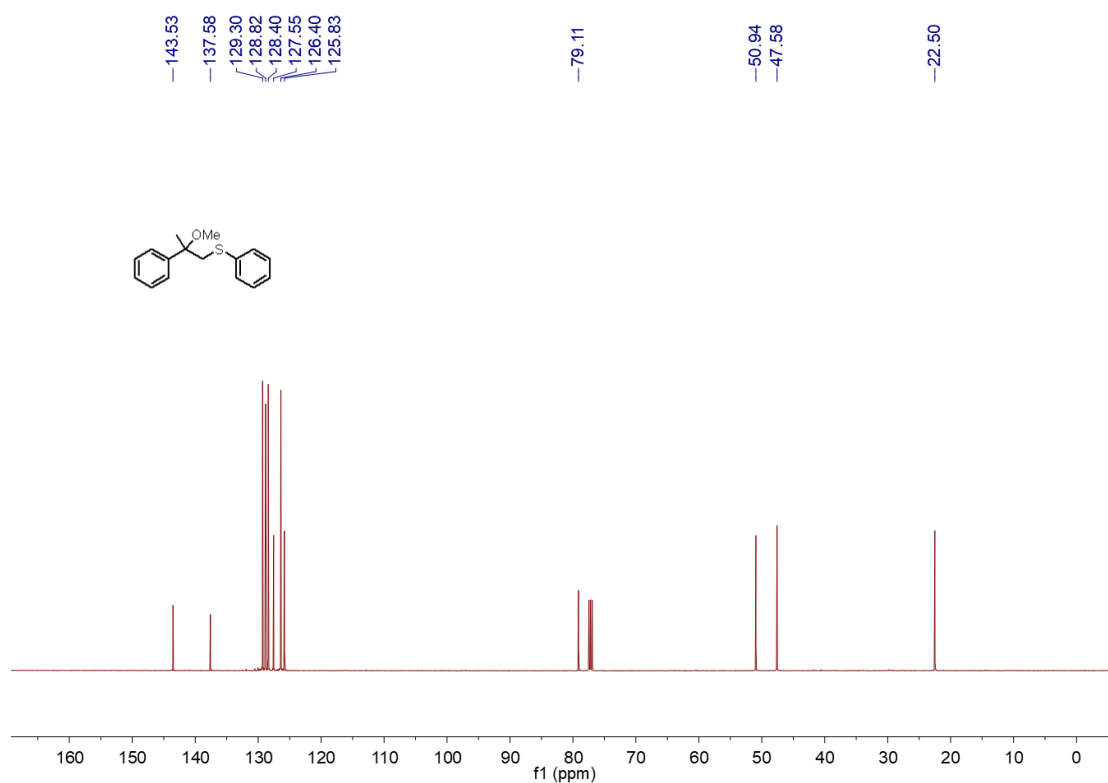

### <sup>1</sup>H NMR spectrum of c50

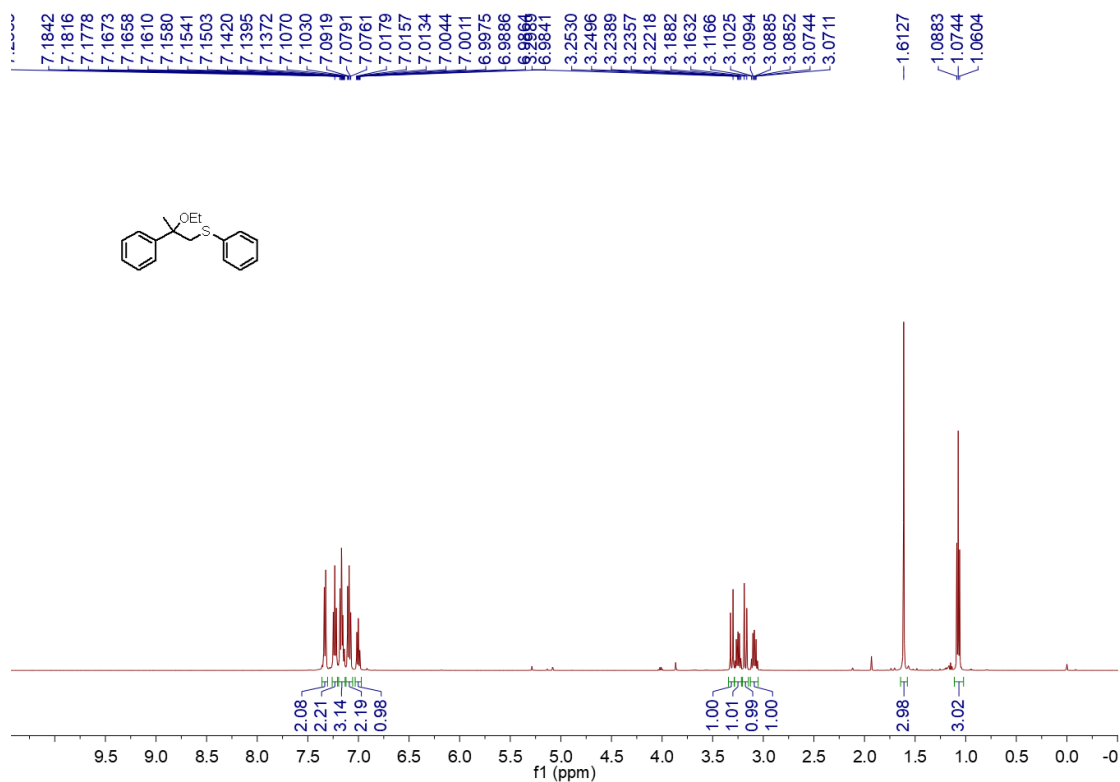

### <sup>13</sup>C NMR spectrum of c50

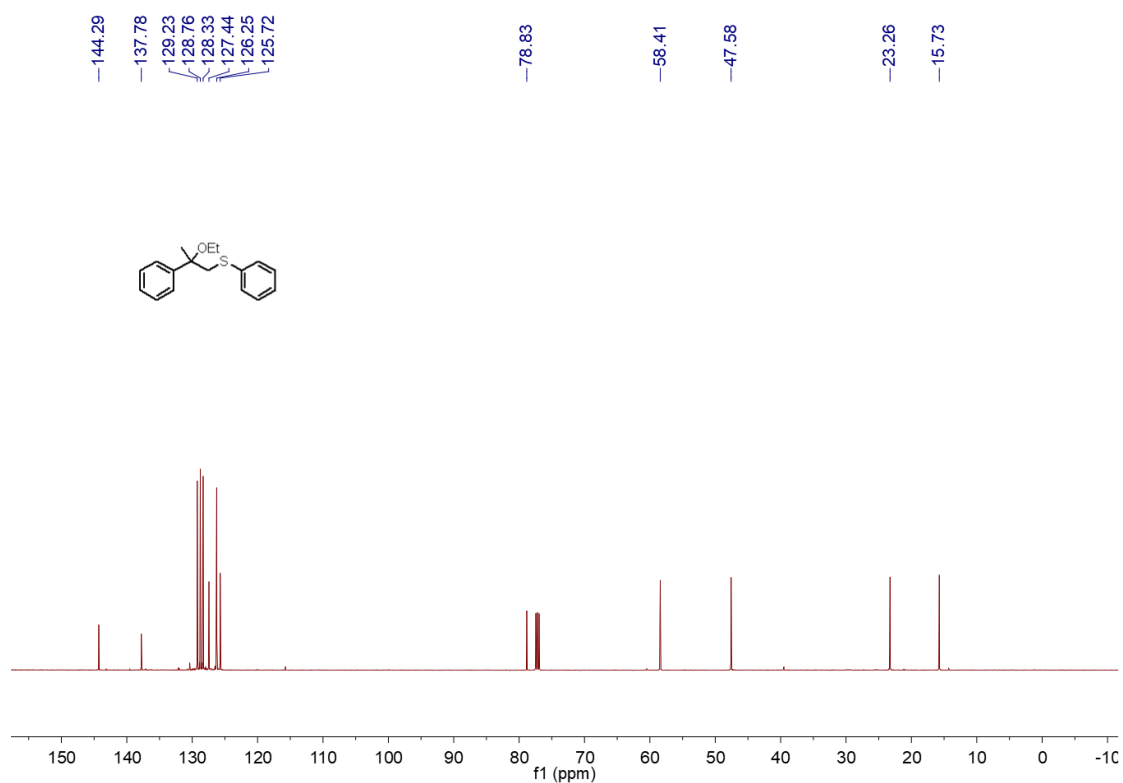

### <sup>1</sup>H NMR spectrum of c51

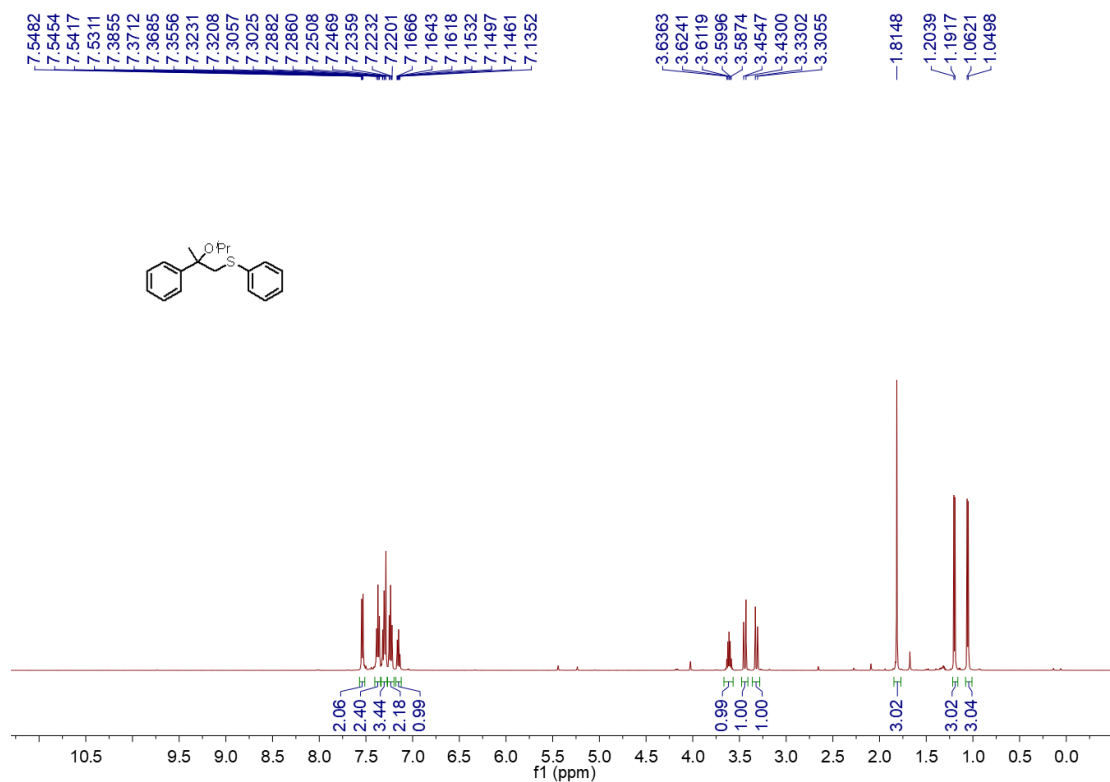

### <sup>13</sup>C NMR spectrum of c51

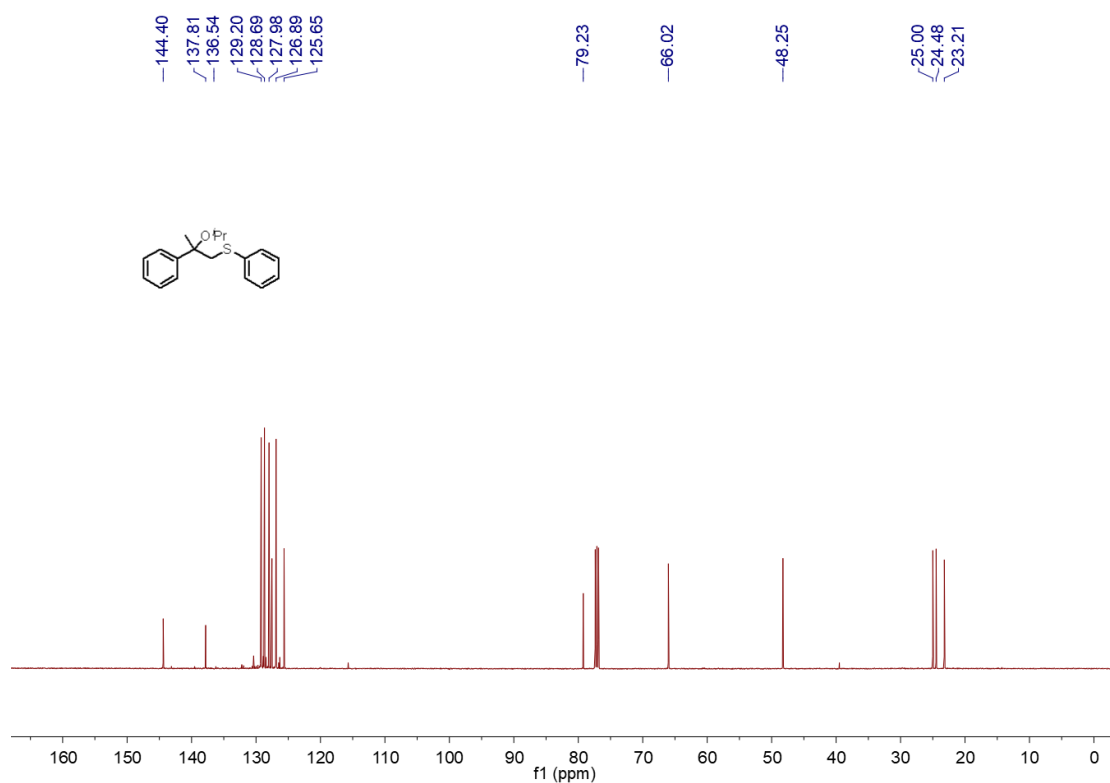

### <sup>1</sup>H NMR spectrum of c52

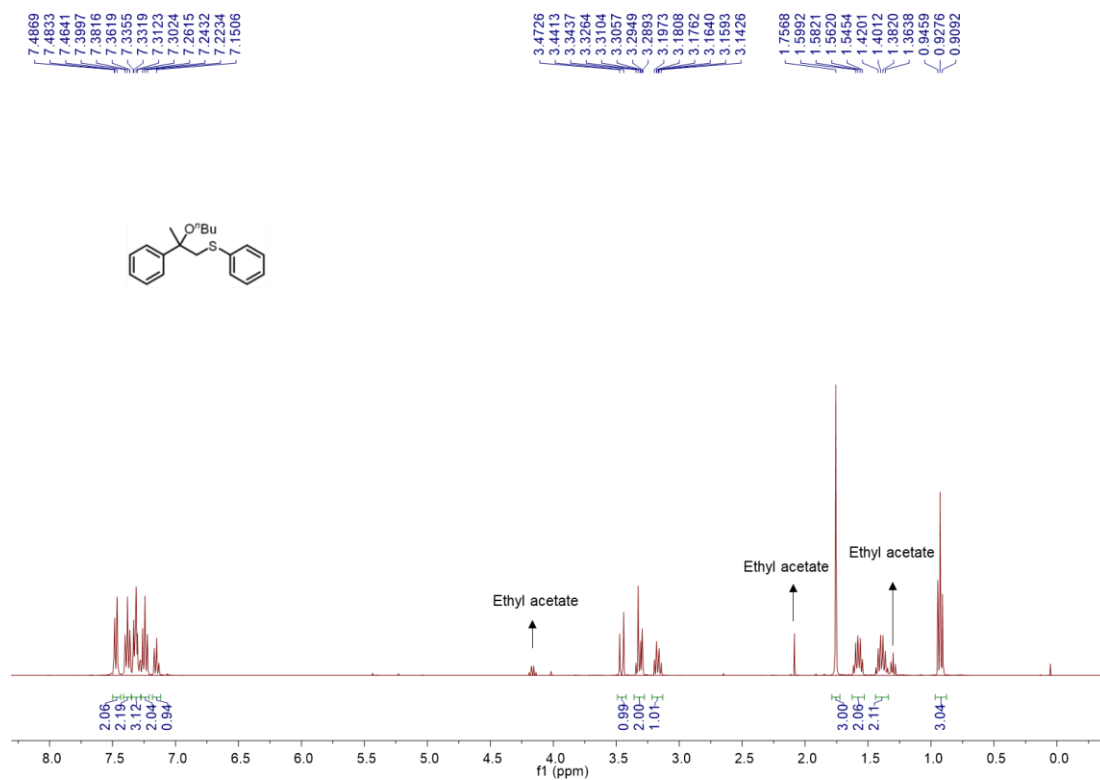

### <sup>13</sup>C NMR spectrum of c52

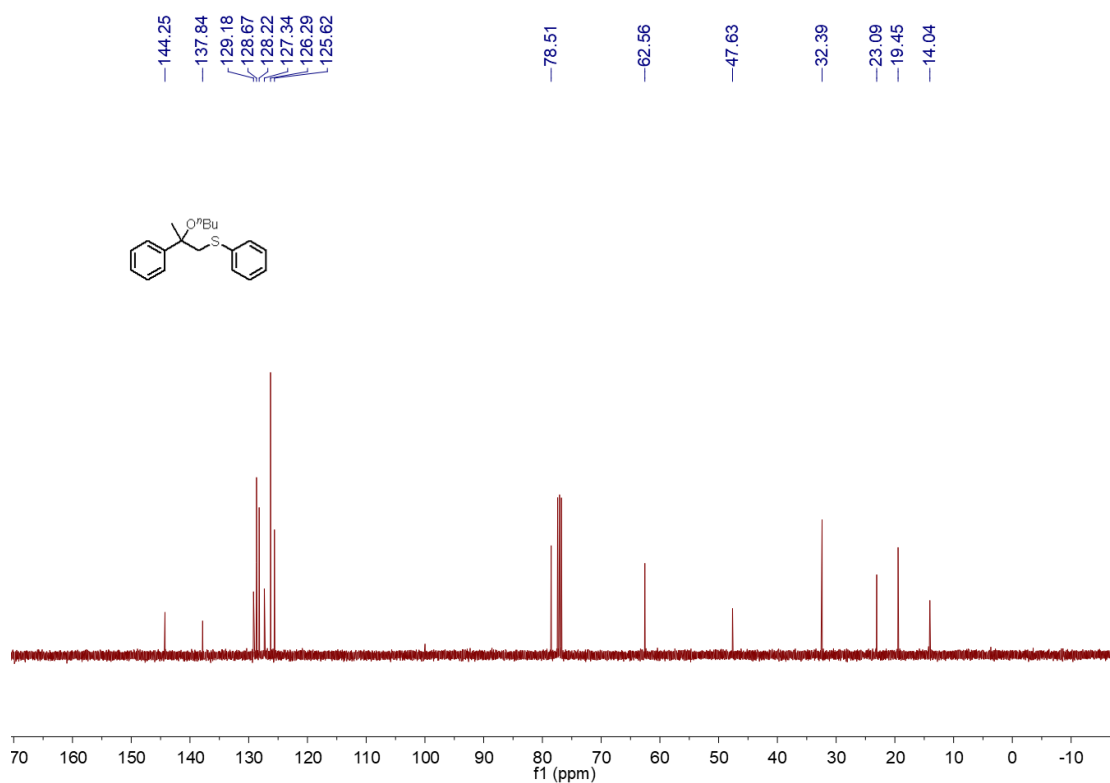

### <sup>1</sup>H NMR spectrum of c53

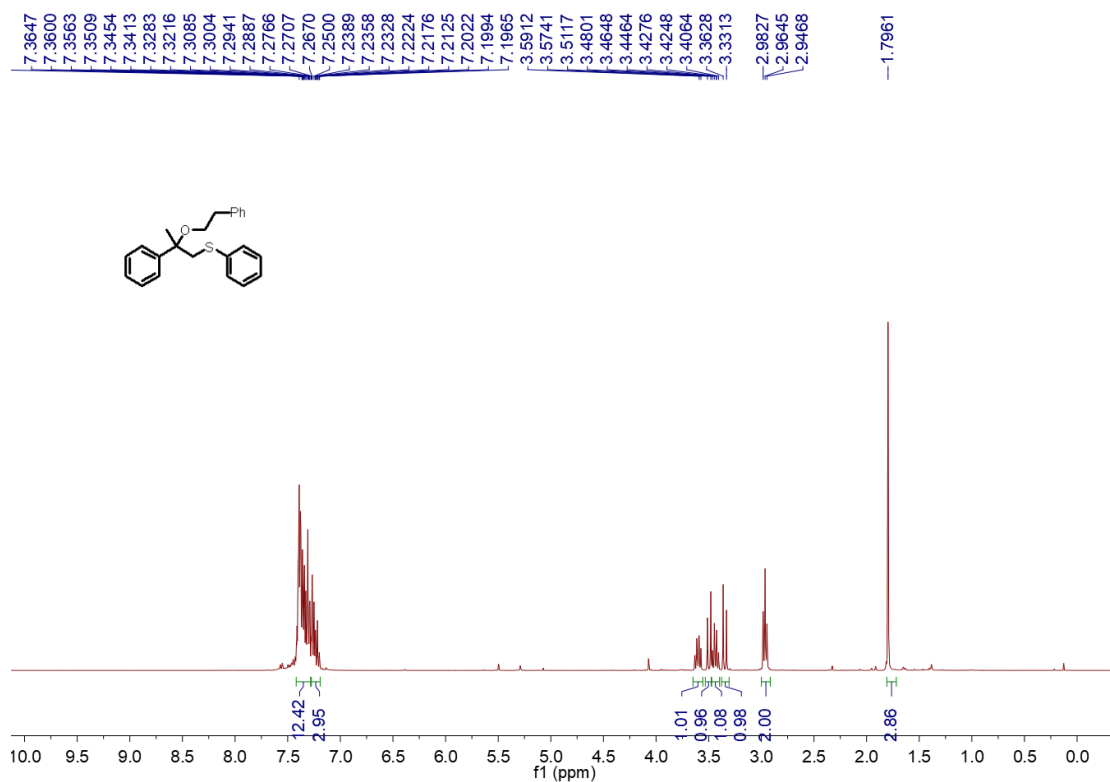

### <sup>13</sup>C NMR spectrum of c53

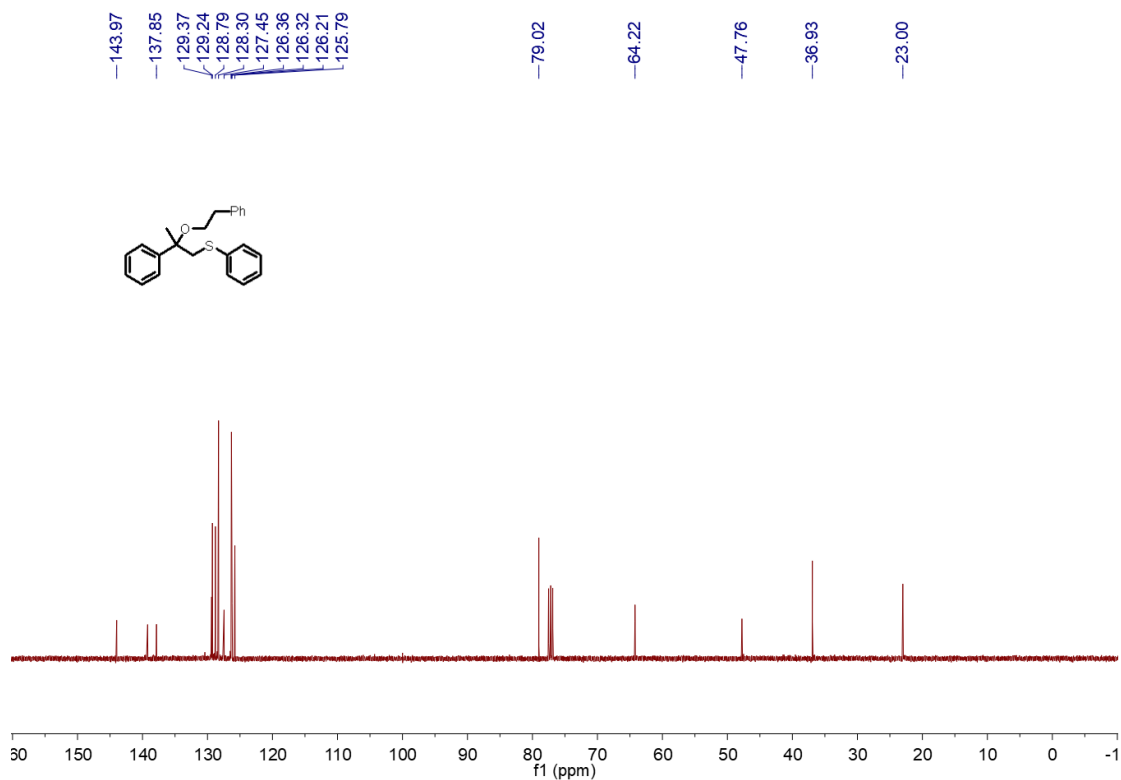

### <sup>1</sup>H NMR spectrum of c54

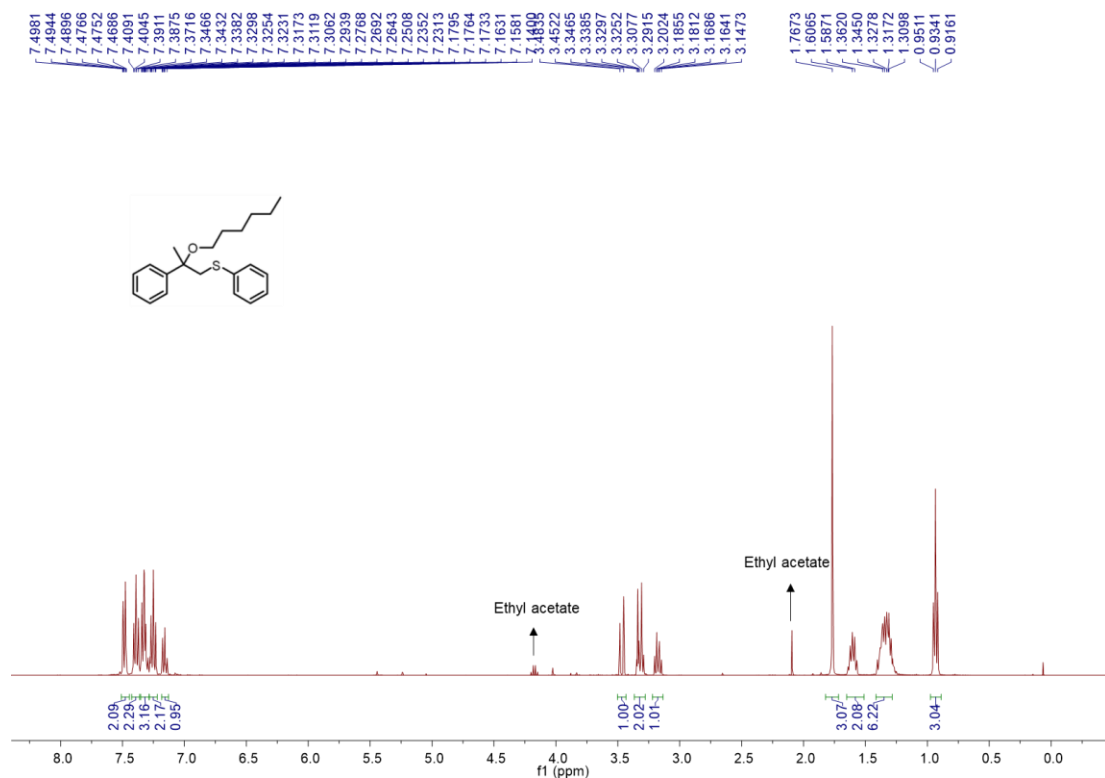



### <sup>13</sup>C NMR spectrum of c54

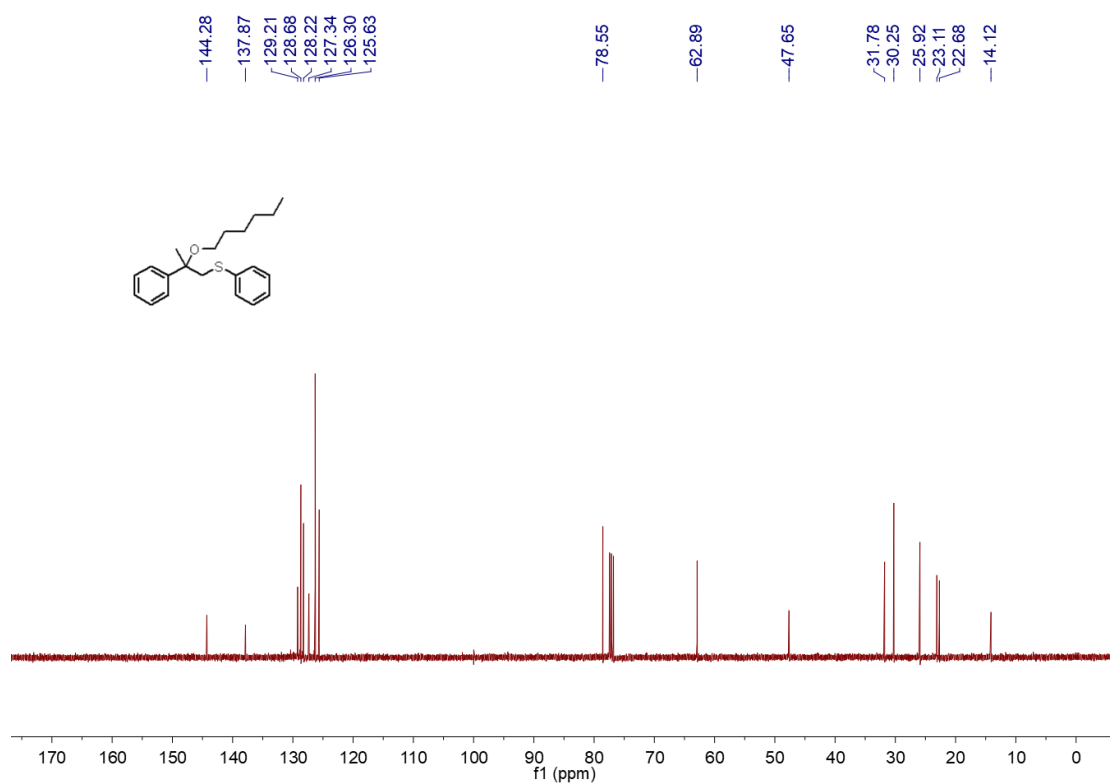

### <sup>1</sup>H NMR spectrum of c55

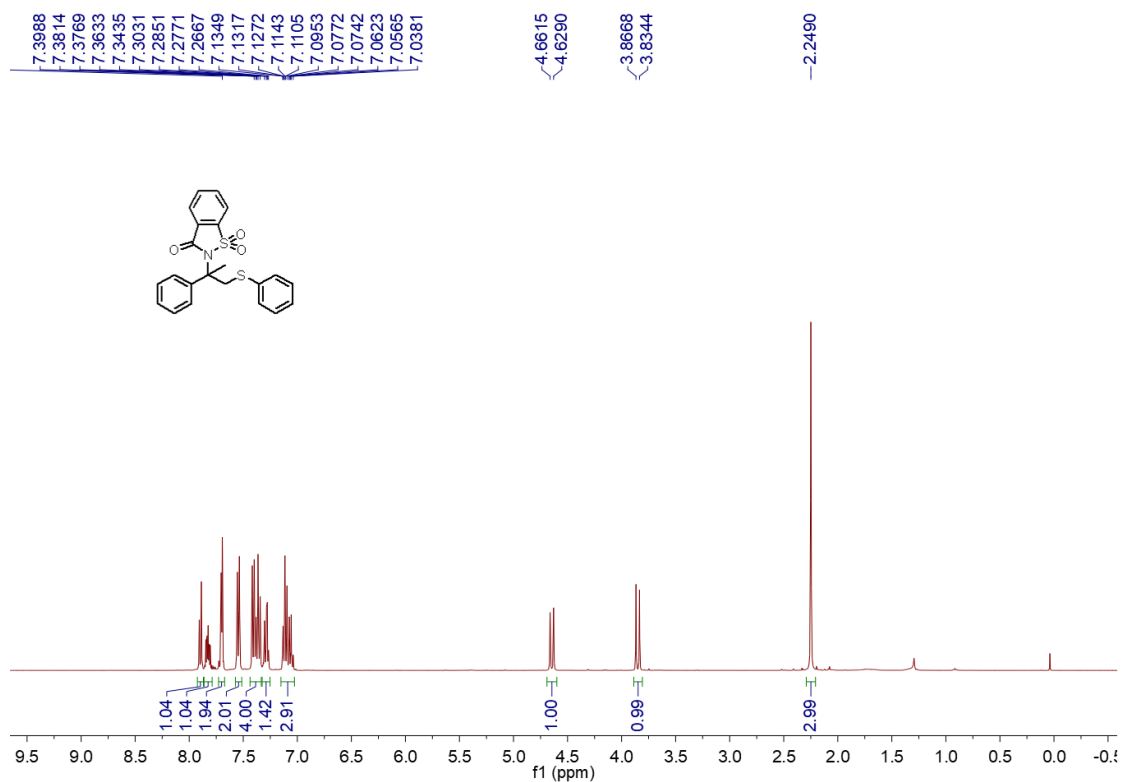

### <sup>13</sup>C NMR spectrum of c55

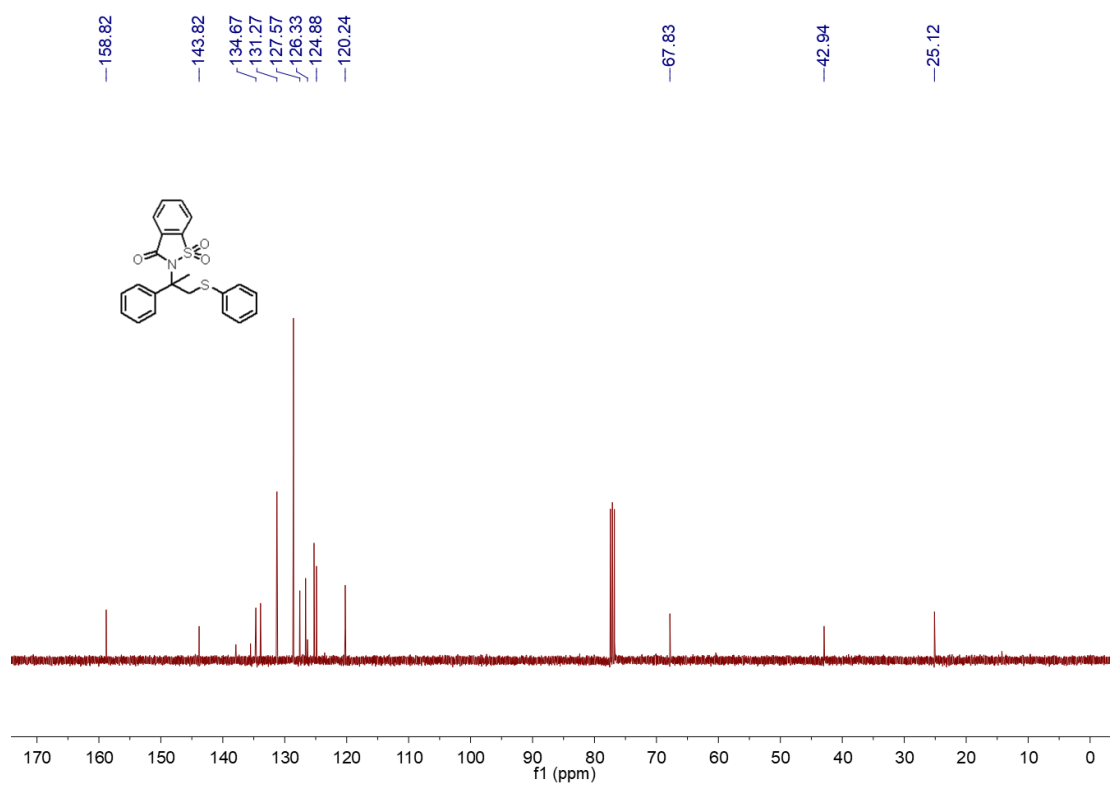

### <sup>1</sup>H NMR spectrum of c56

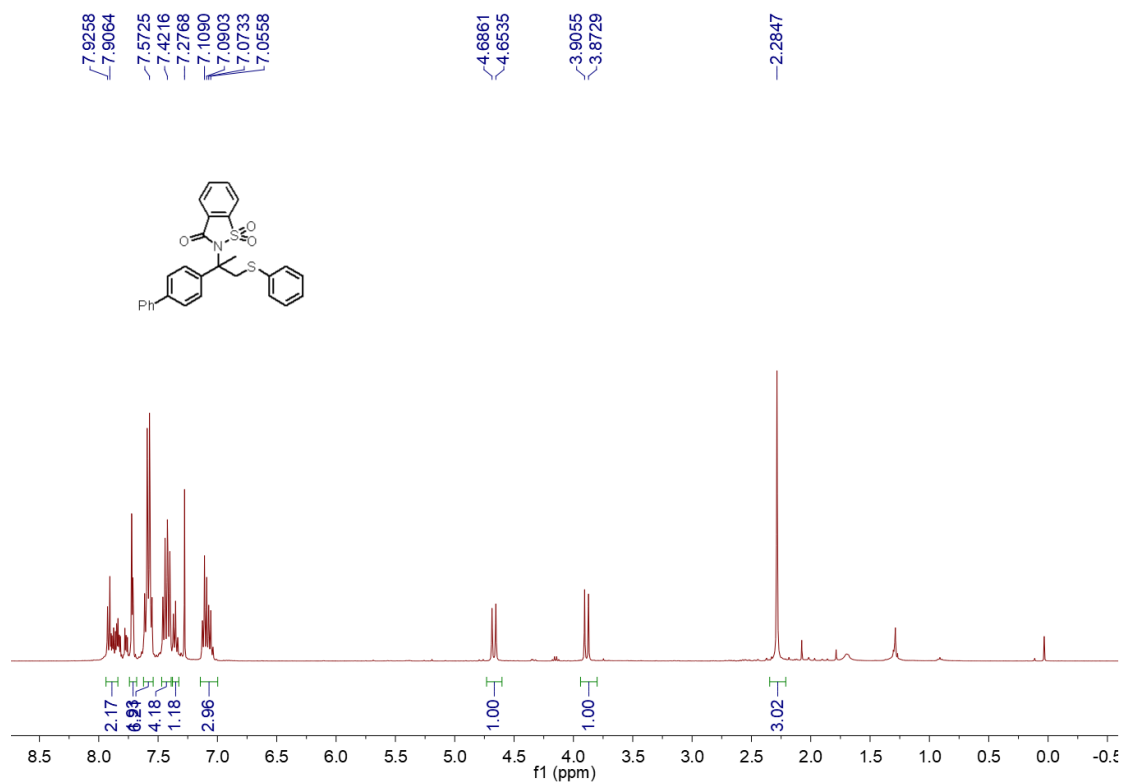

### <sup>13</sup>C NMR spectrum of c56

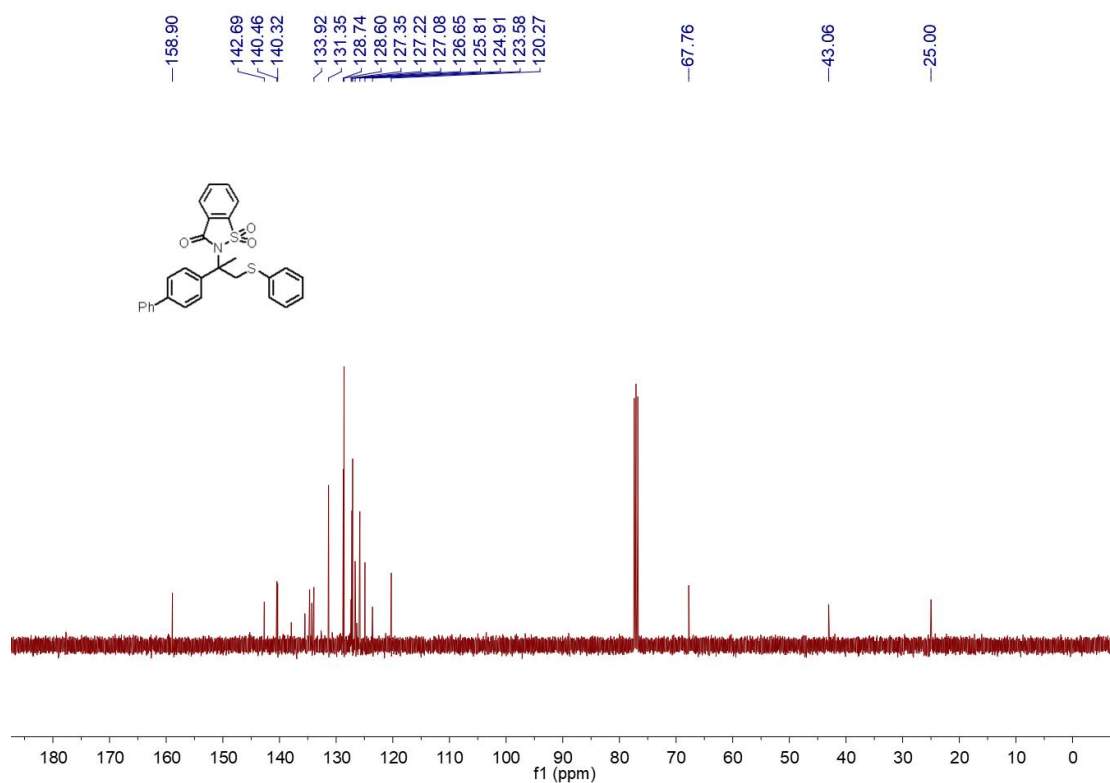

### <sup>1</sup>H NMR spectrum of c57

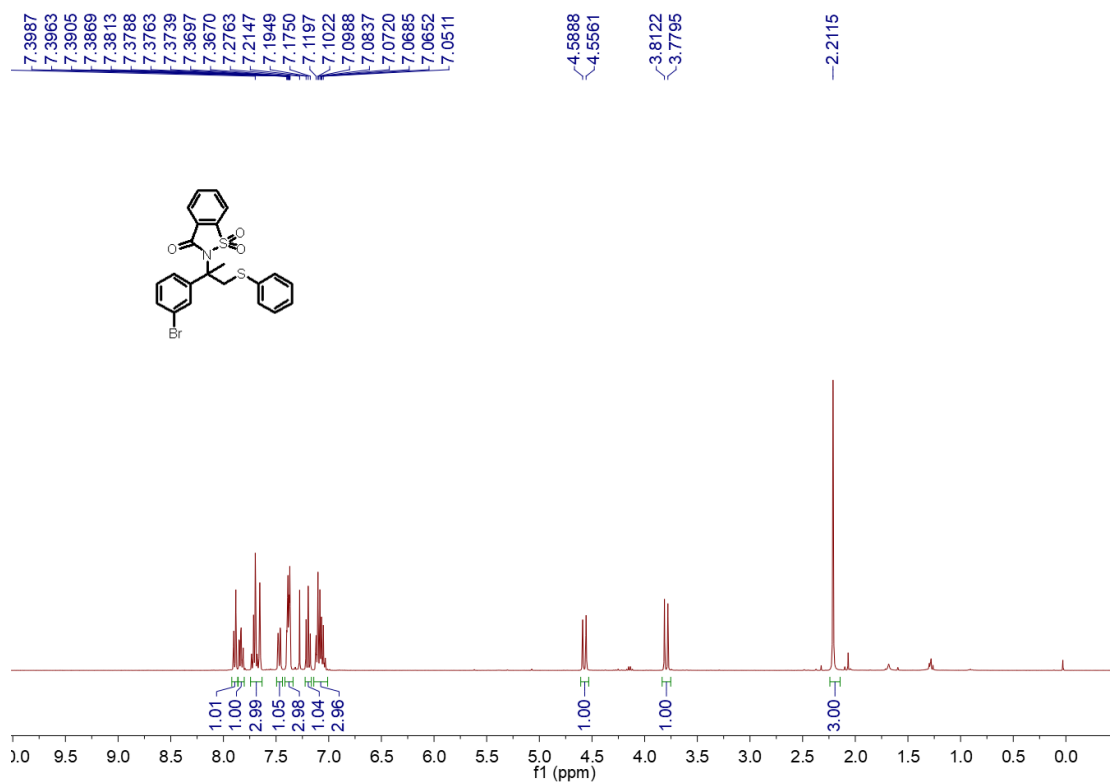

### <sup>13</sup>C NMR spectrum of c57

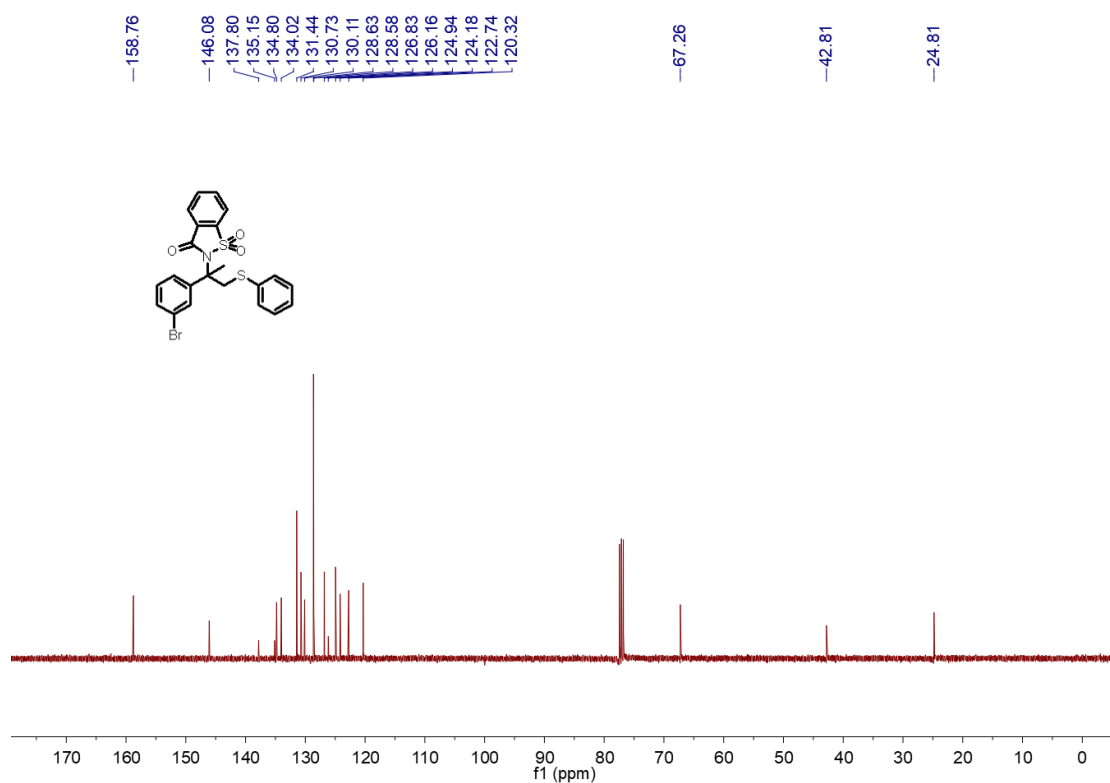

### <sup>1</sup>H NMR spectrum of c58

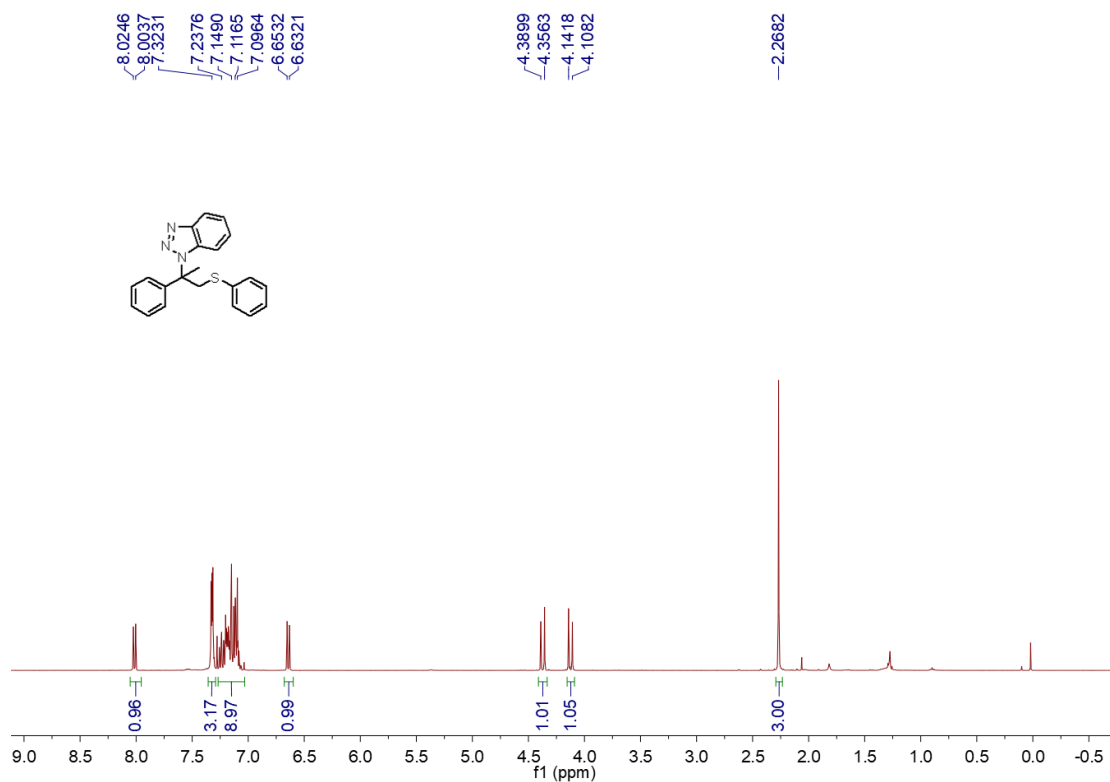

### <sup>13</sup>C NMR spectrum of c58

—146.82  
—141.62  
—135.88  
—128.83  
—126.62  
—123.57  
—120.01  
—111.95

—67.83

—46.98

—26.50

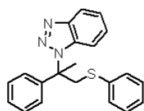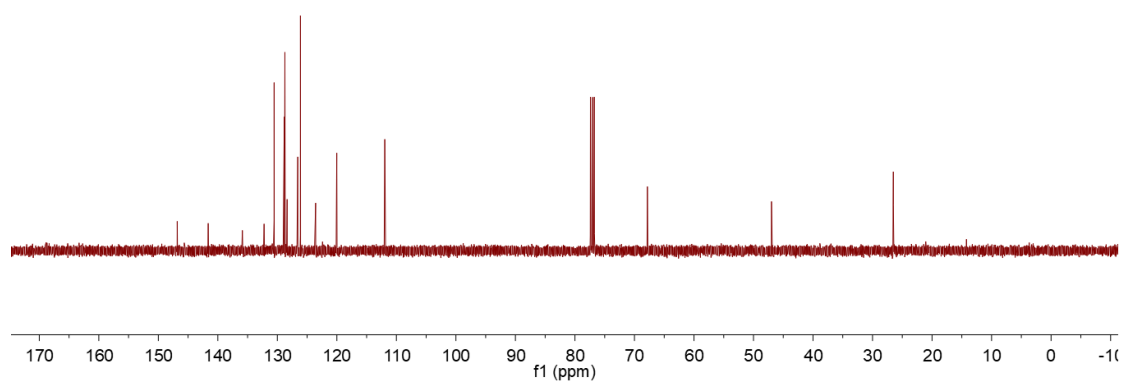

### <sup>1</sup>H NMR spectrum of c59

8.0130  
7.9922  
7.2334  
7.1745  
7.1540  
7.1363  
7.1144  
7.0924  
7.0730  
7.0501  
7.0101  
6.8436  
6.7791  
6.7235  
6.7026

4.3731  
4.3394  
4.1186  
4.0849  
3.6868

2.2424

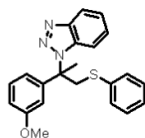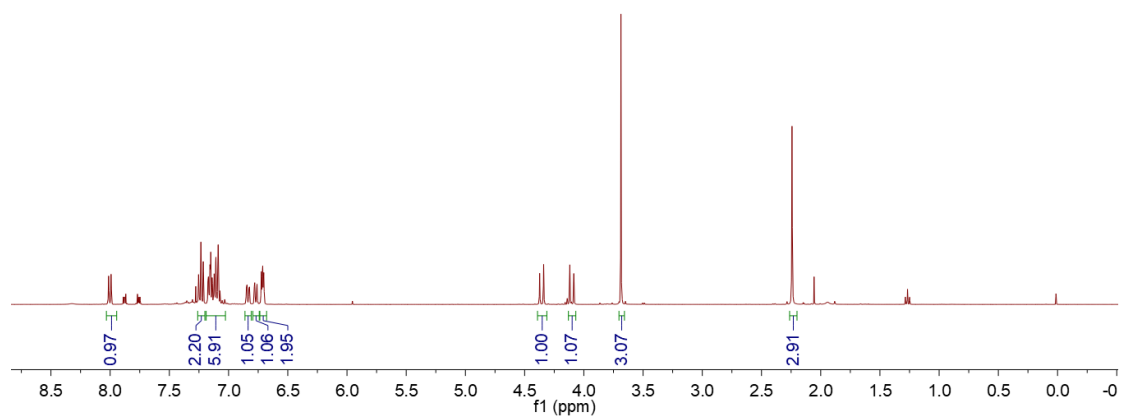

### <sup>13</sup>C NMR spectrum of c59

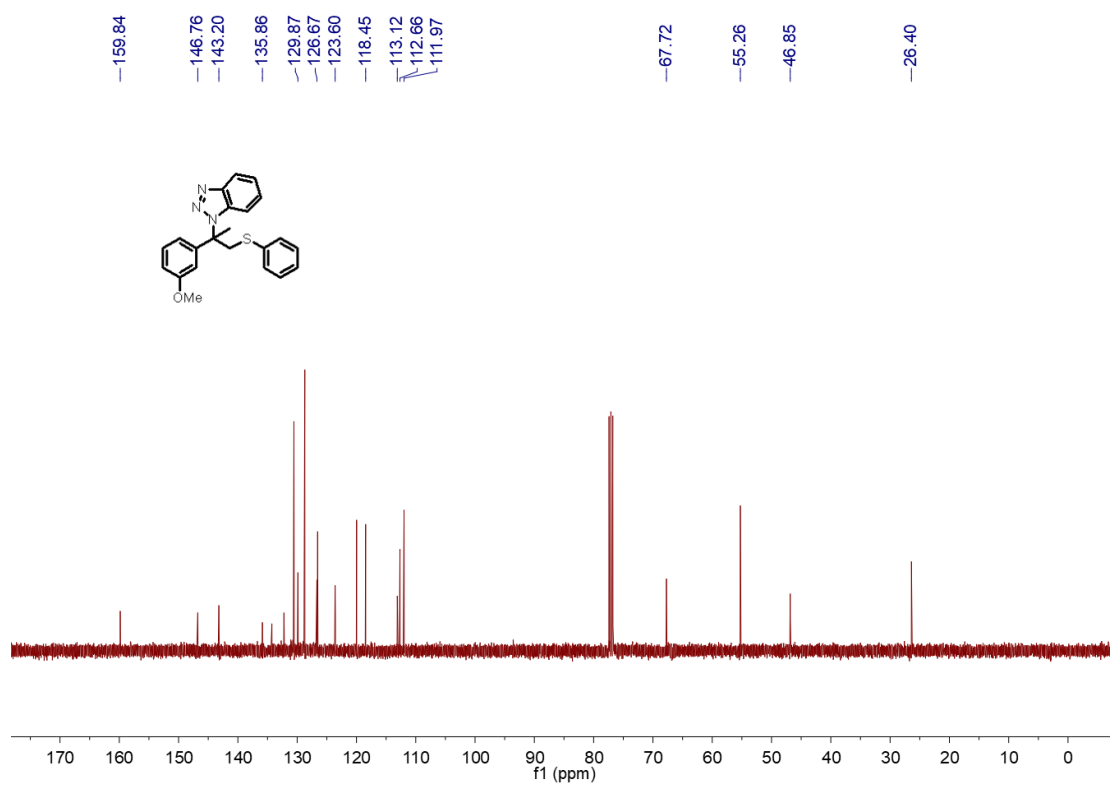

### <sup>1</sup>H NMR spectrum of c60

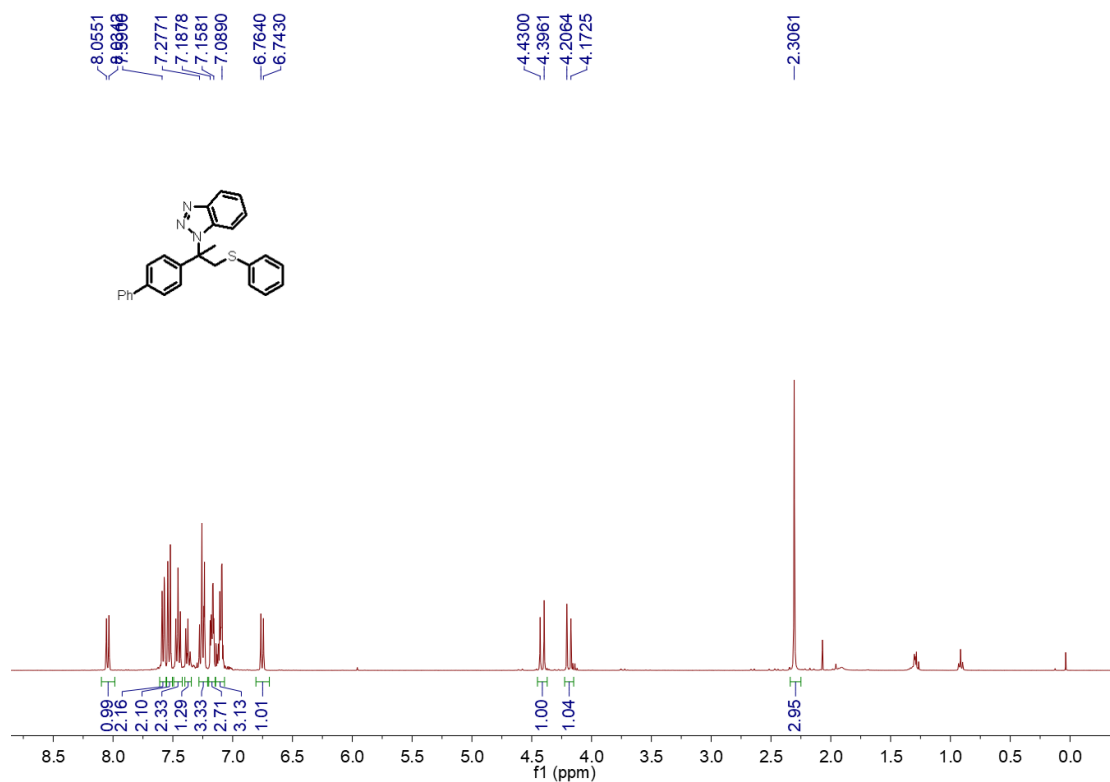

### <sup>13</sup>C NMR spectrum of c60

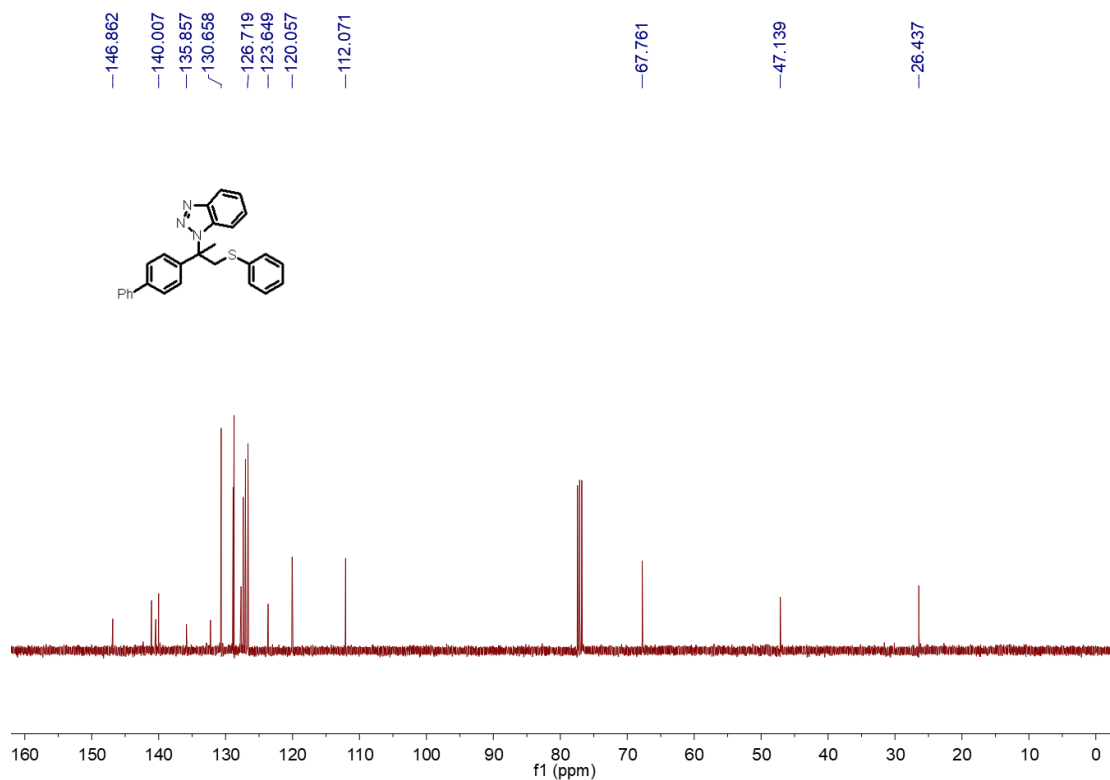

### <sup>1</sup>H NMR spectrum of c61

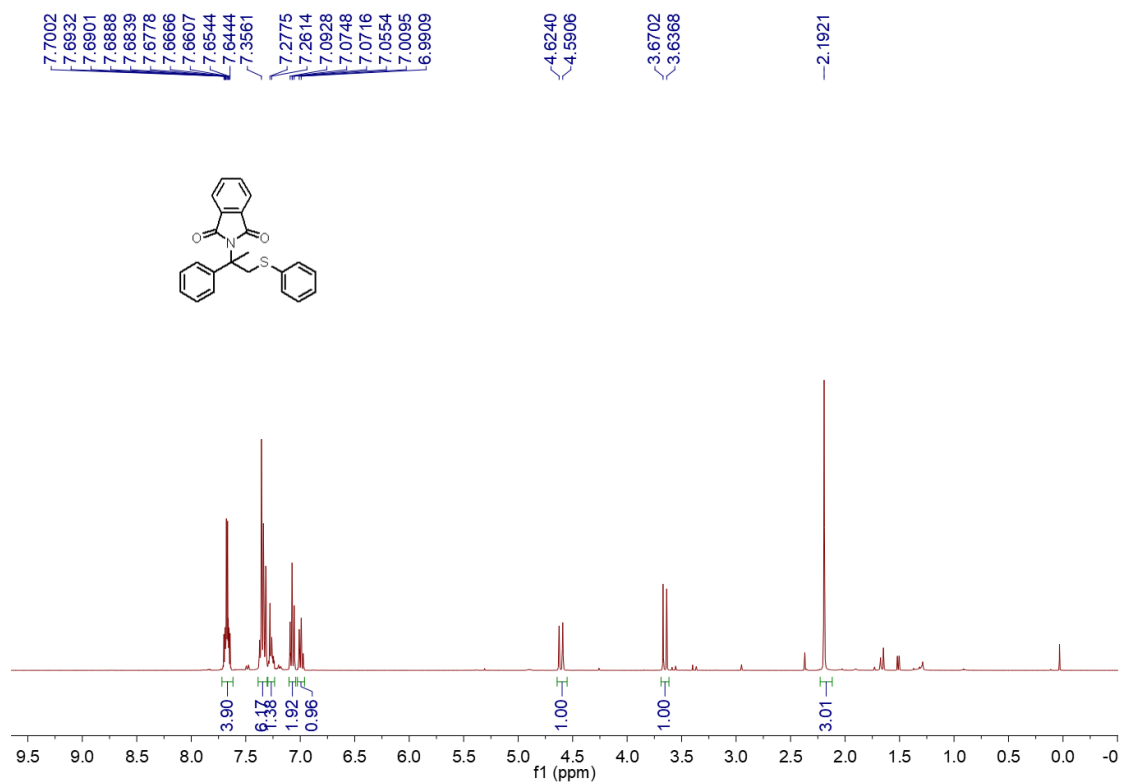

### <sup>13</sup>C NMR spectrum of c61

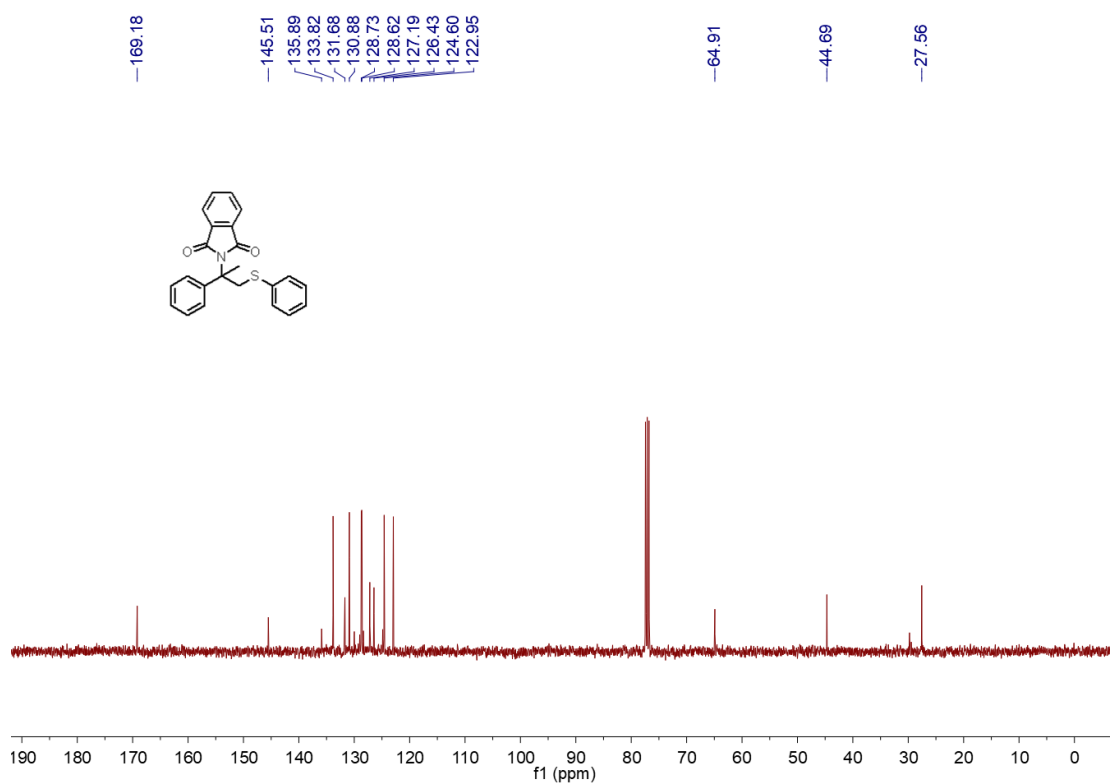

### <sup>1</sup>H NMR spectrum of c62

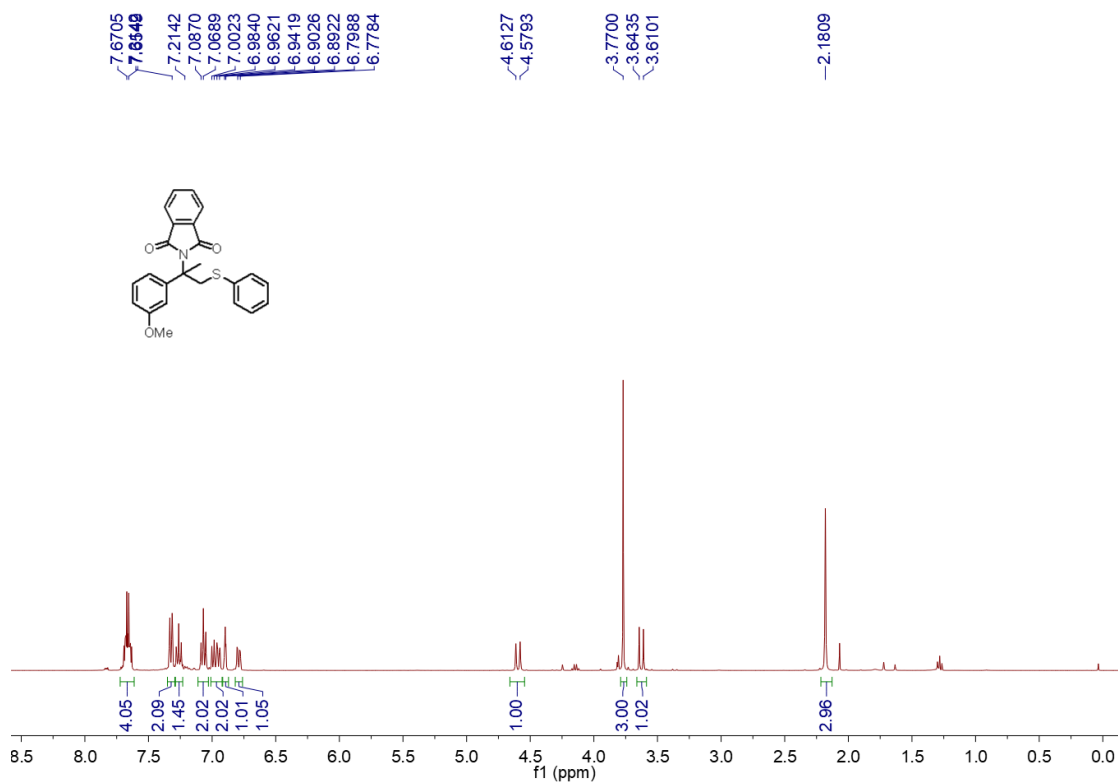



### <sup>13</sup>C NMR spectrum of c62

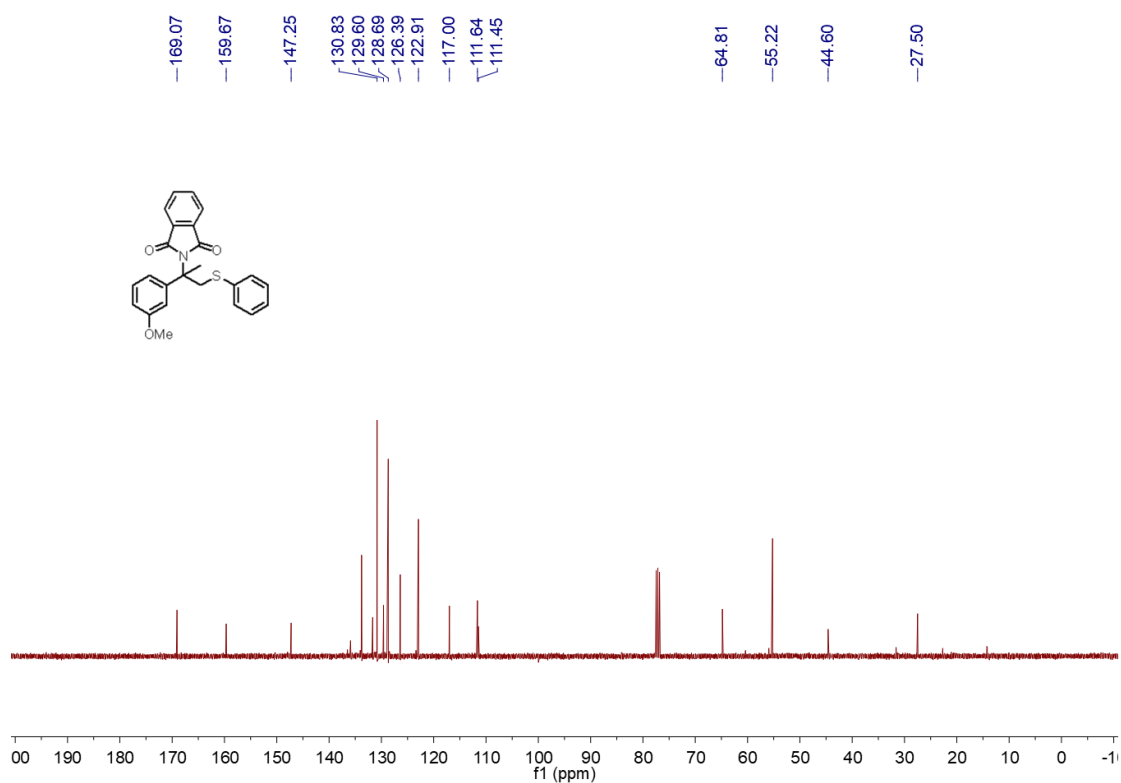

### <sup>1</sup>H NMR spectrum of c63

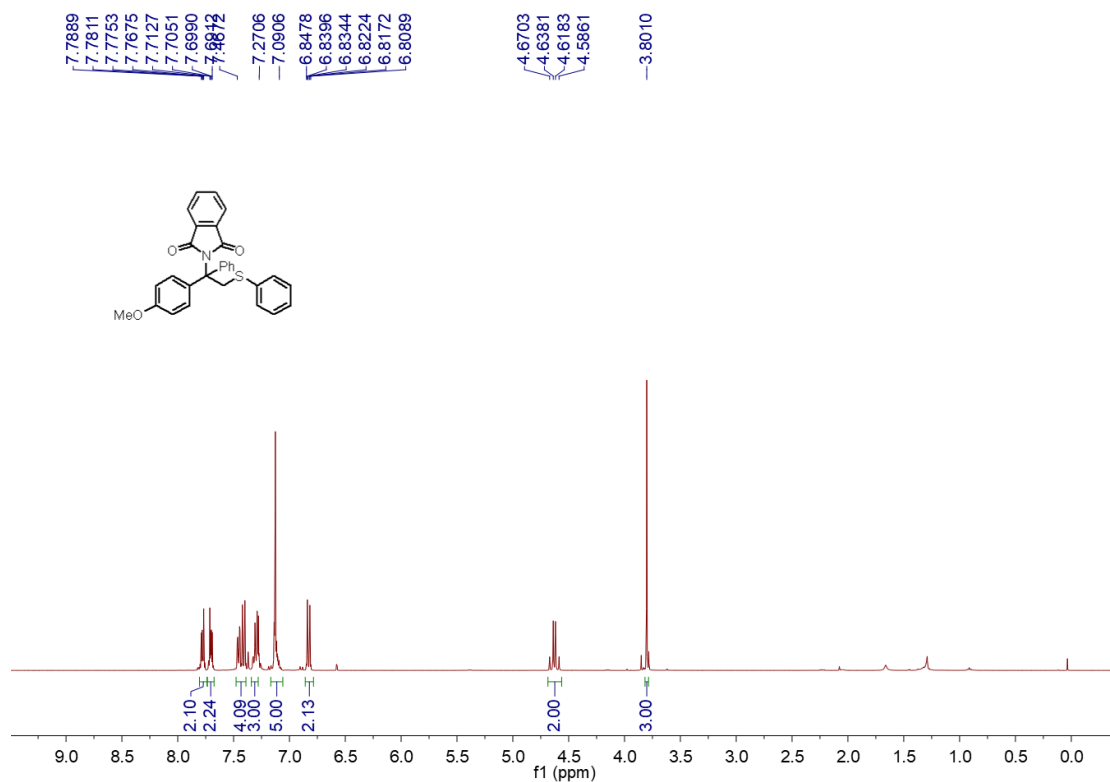

### <sup>13</sup>C NMR spectrum of c63

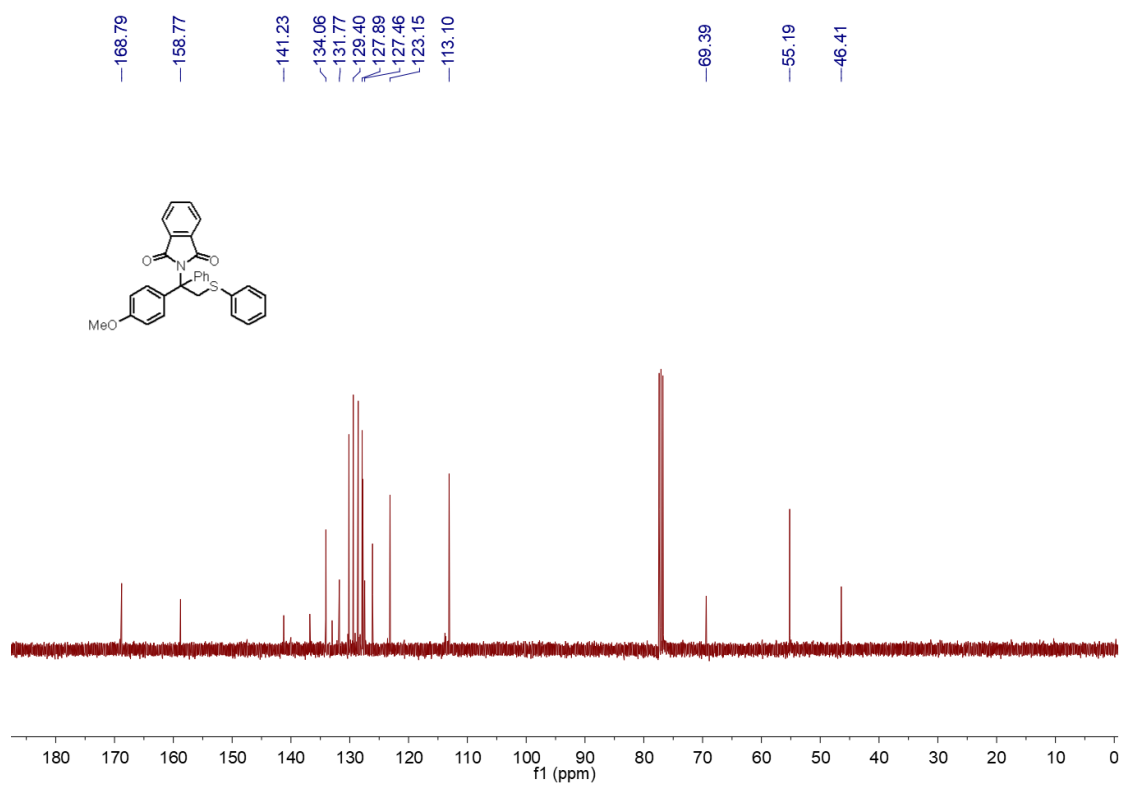

### <sup>1</sup>H NMR spectrum of c64

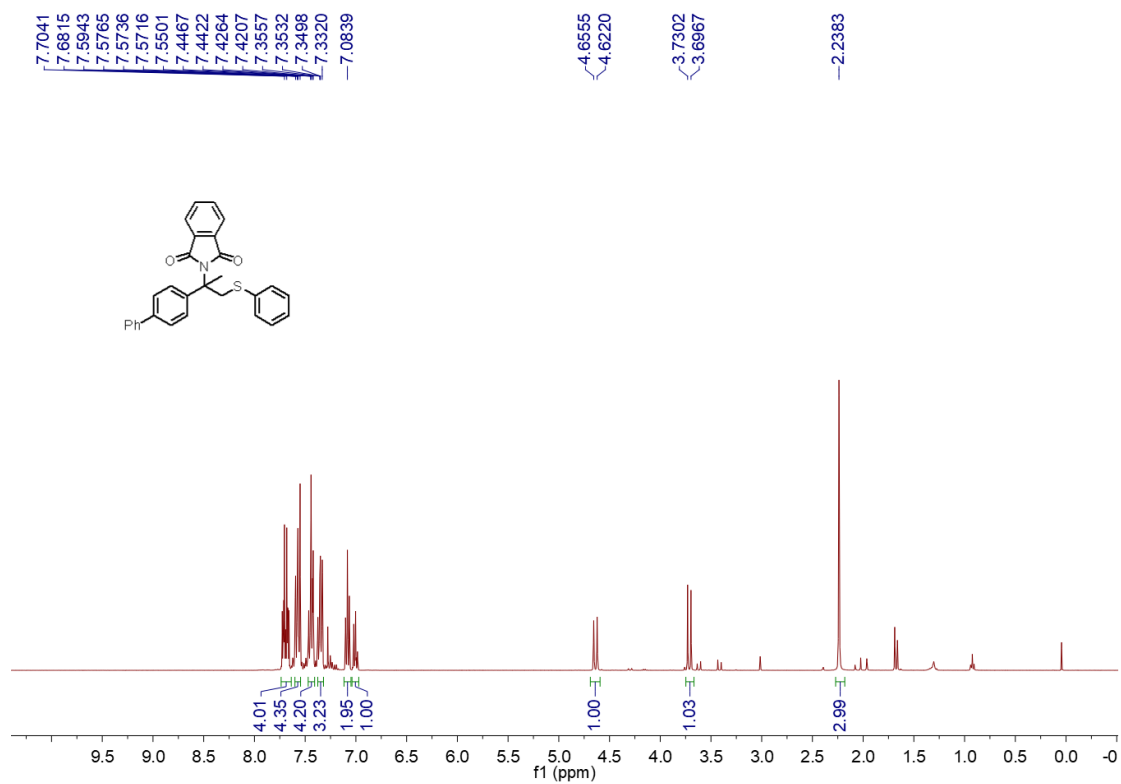

### <sup>13</sup>C NMR spectrum of c64

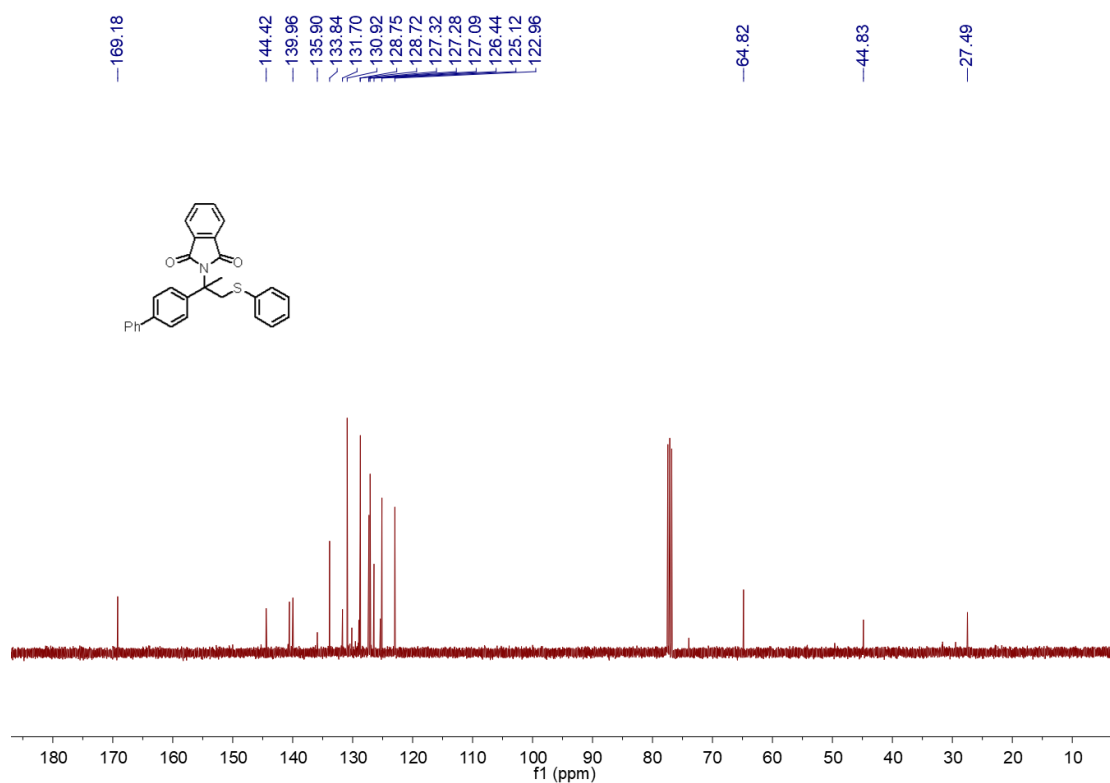

### <sup>1</sup>H NMR spectrum of c65

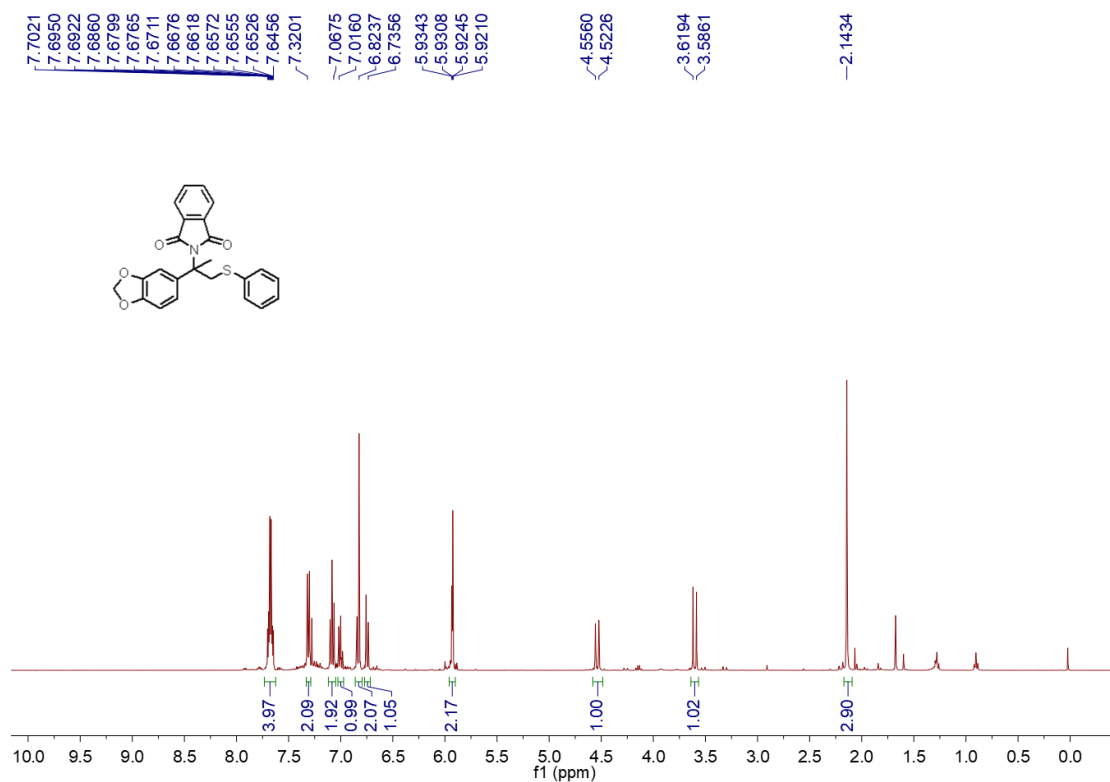

### <sup>13</sup>C NMR spectrum of c65

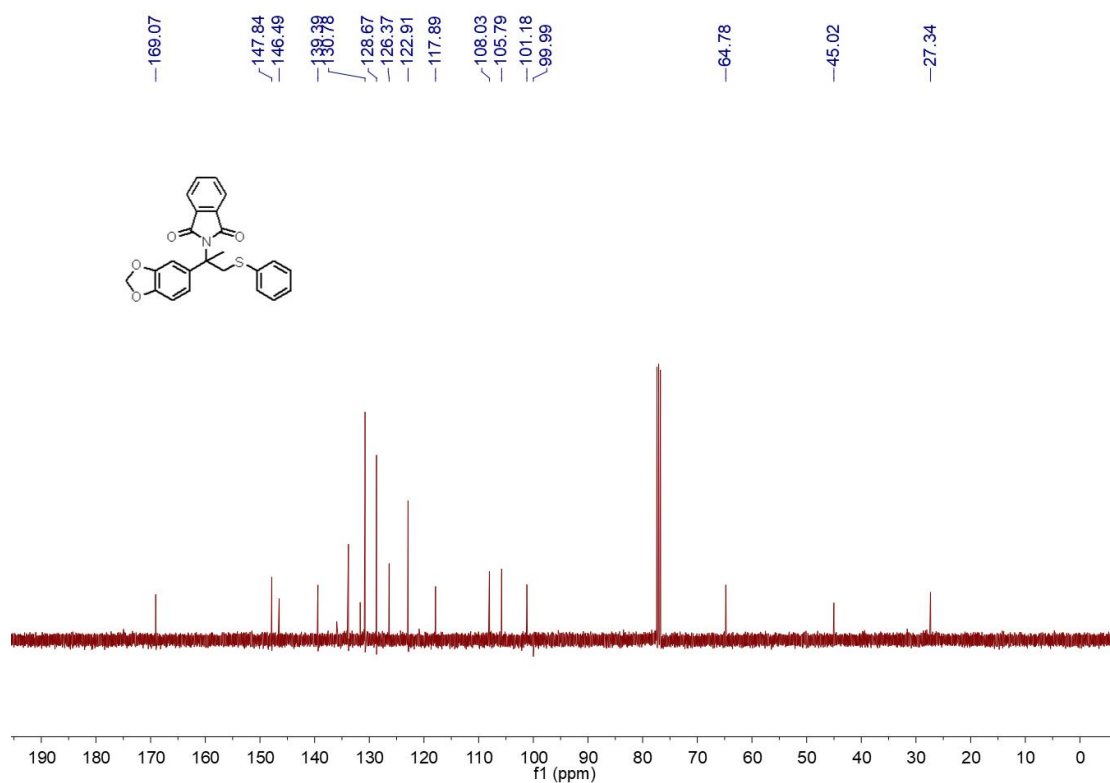

### <sup>1</sup>H NMR spectrum of c66

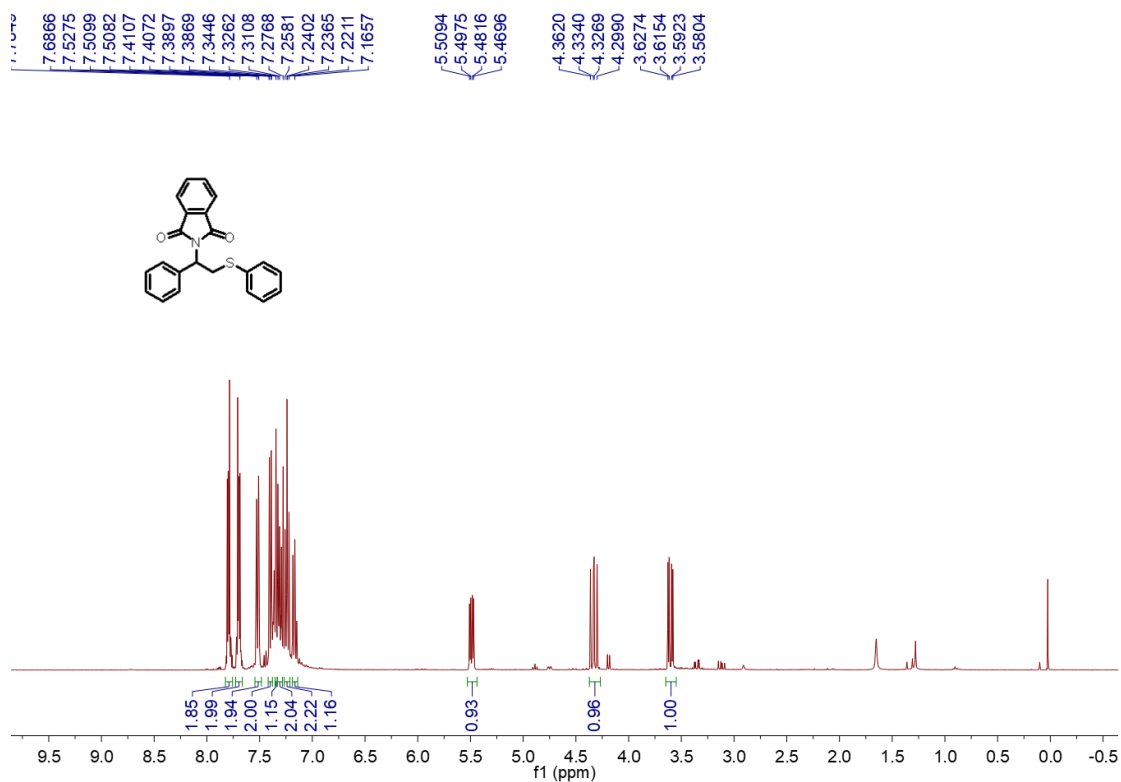

### <sup>13</sup>C NMR spectrum of c66

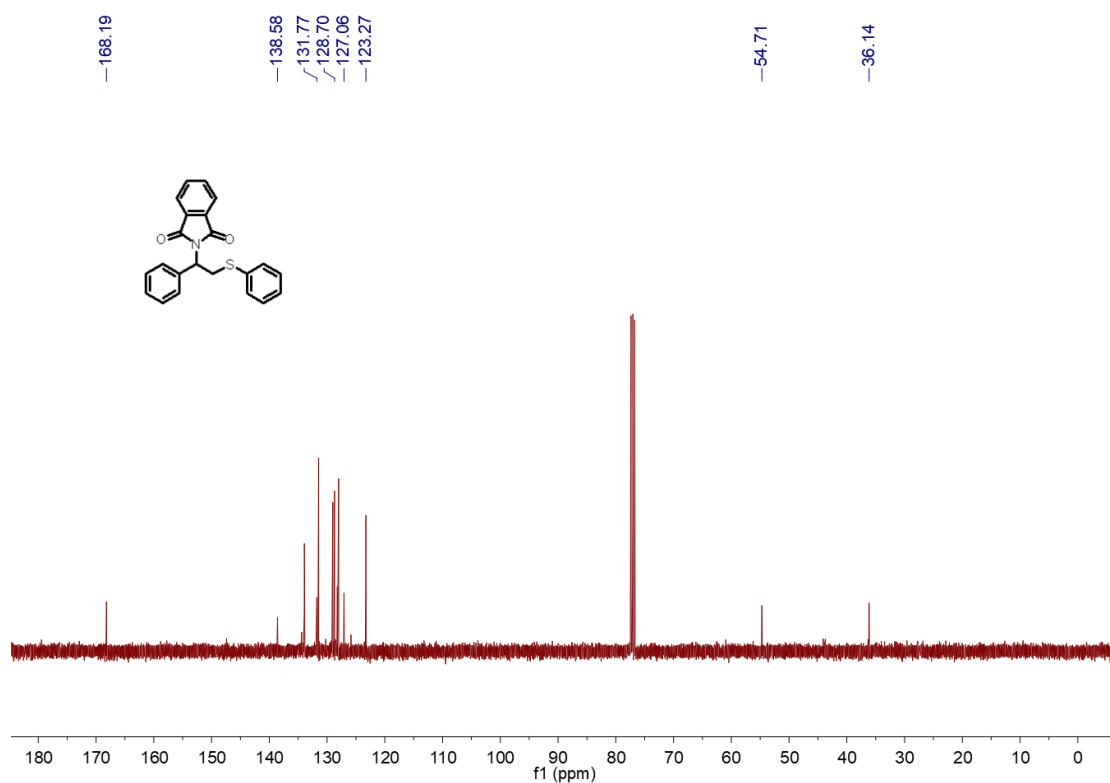

### <sup>1</sup>H NMR spectrum of c67

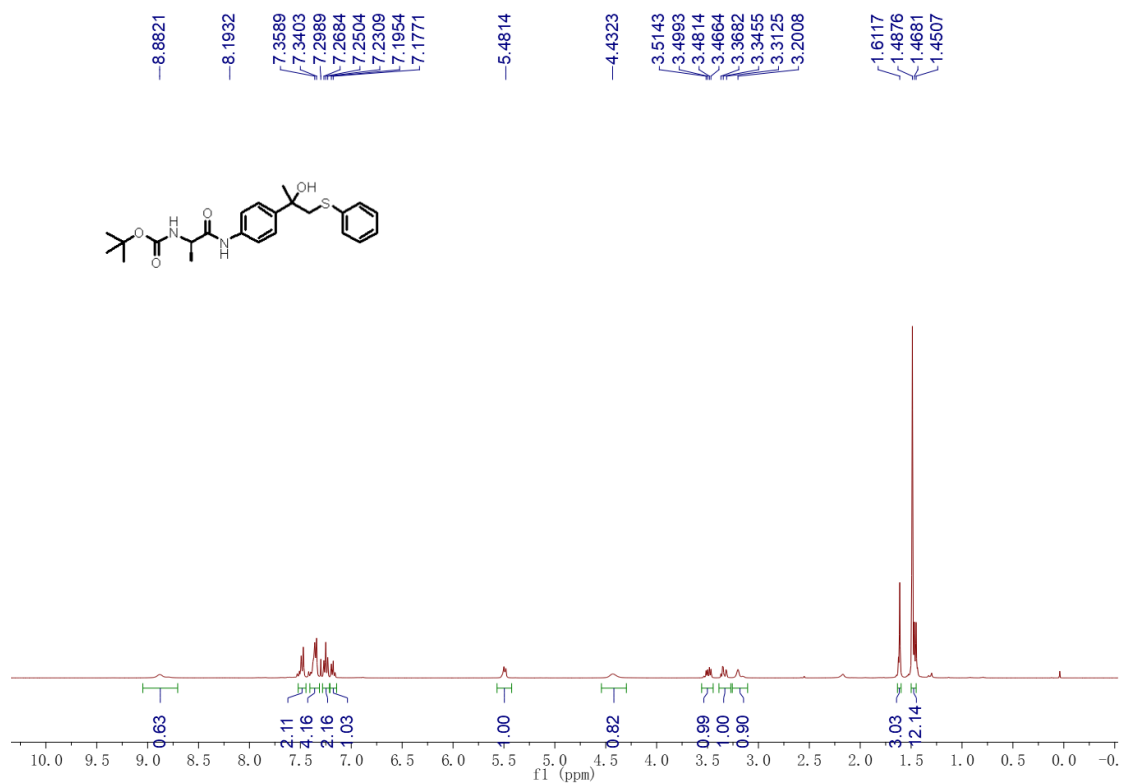

### <sup>13</sup>C NMR spectrum of c67

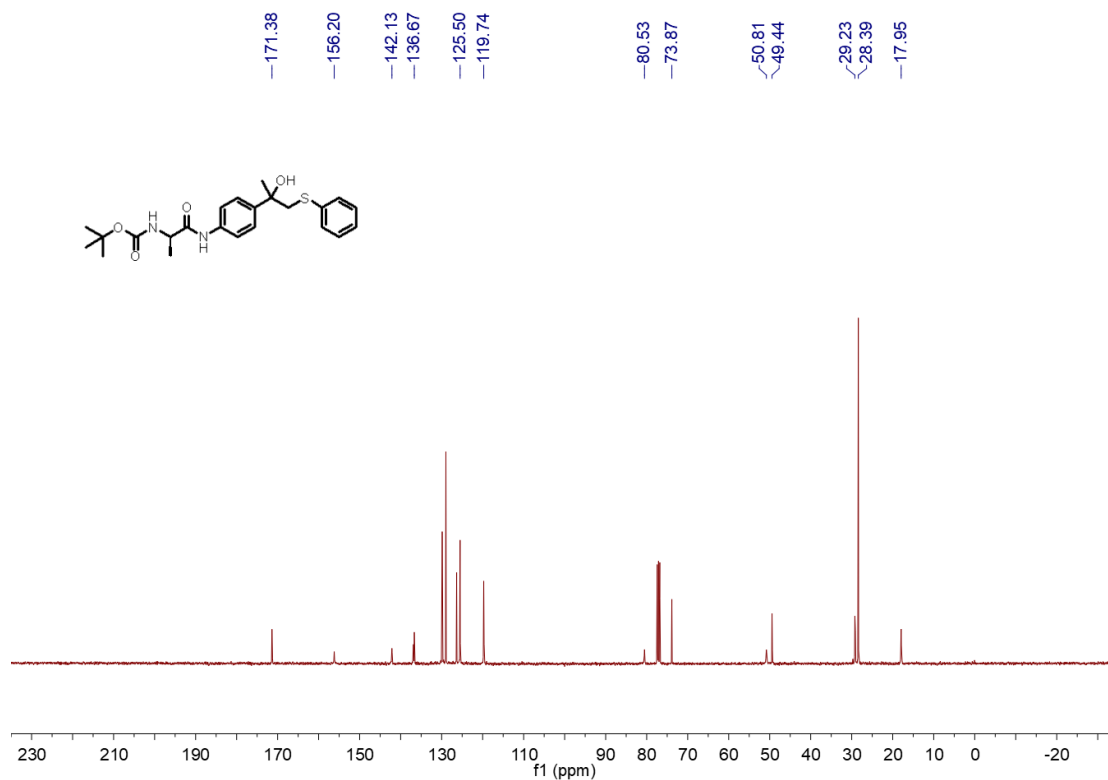

### <sup>1</sup>H NMR spectrum of c68

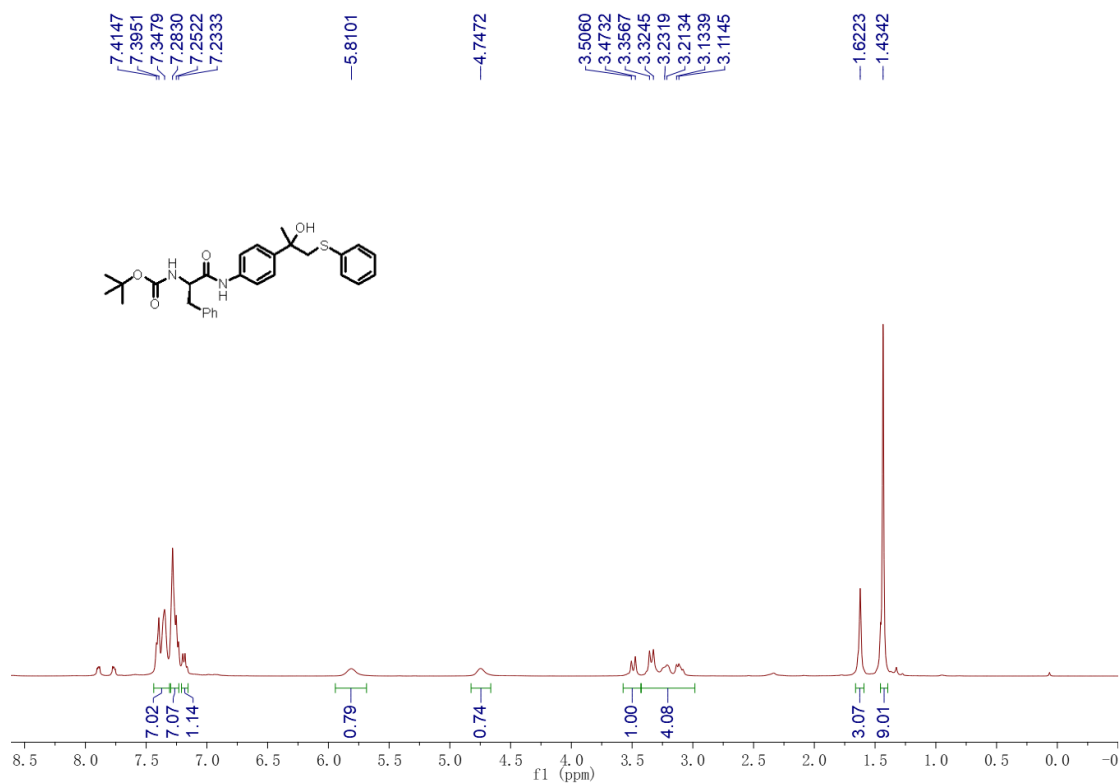

### <sup>13</sup>C NMR spectrum of c68

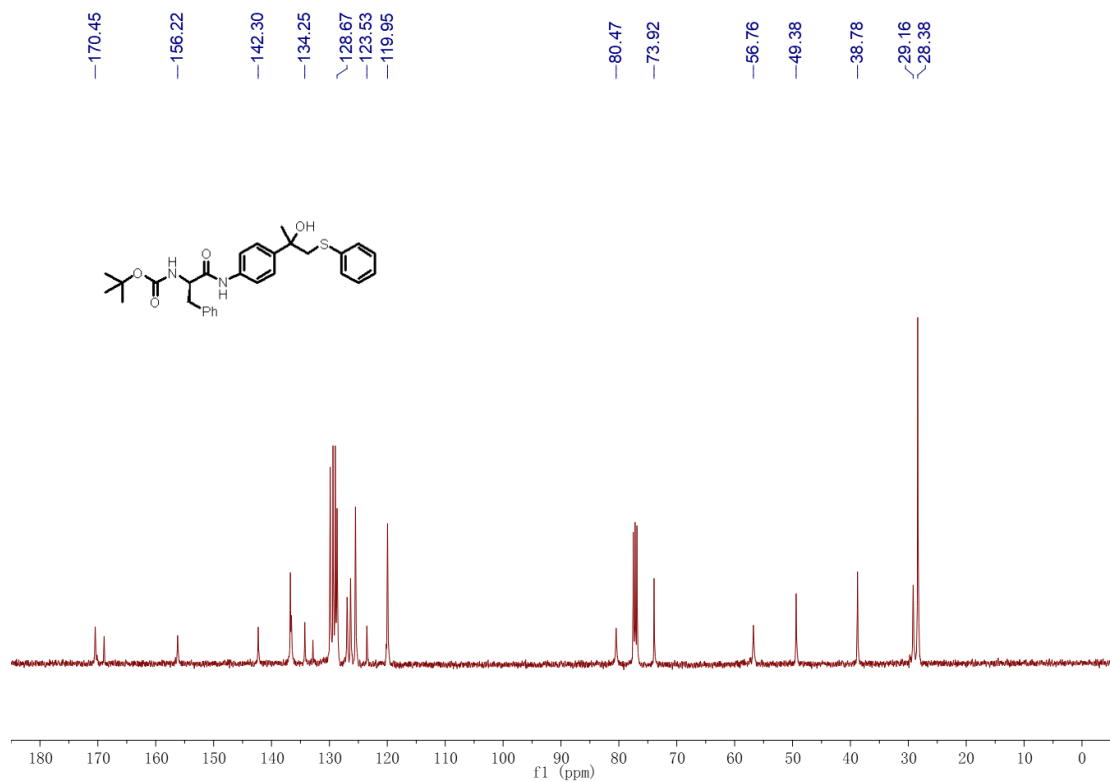

### <sup>1</sup>H NMR spectrum of c69

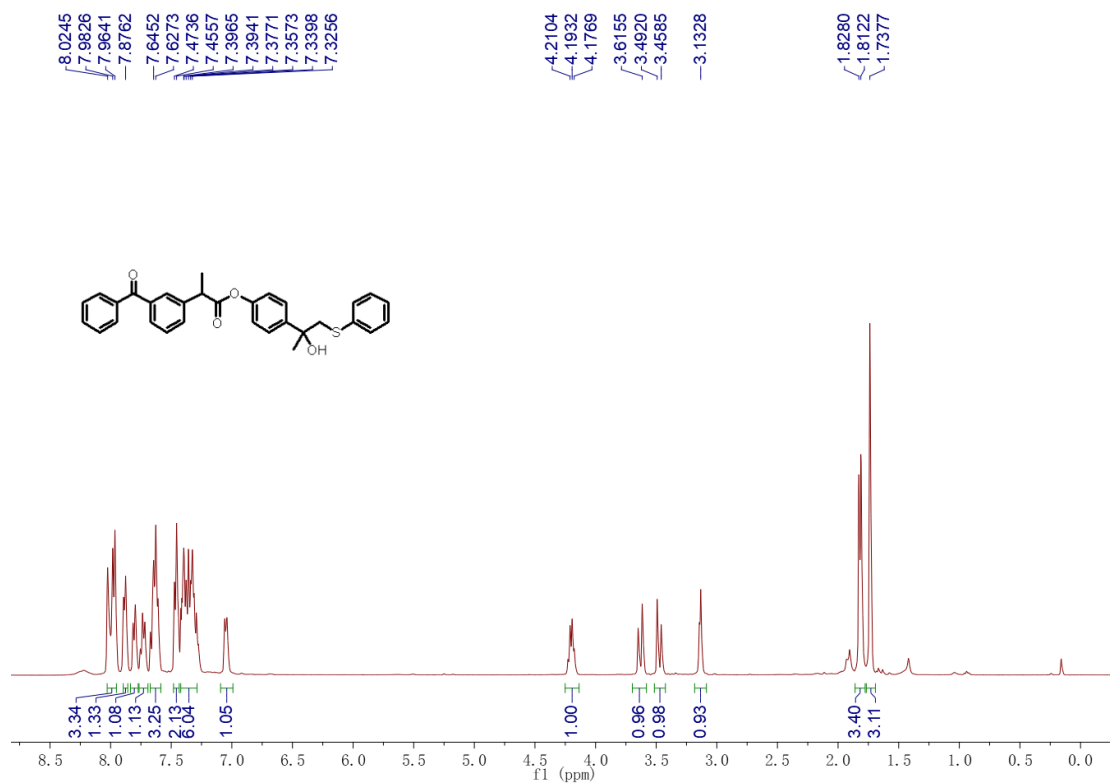

### <sup>13</sup>C NMR spectrum of c69

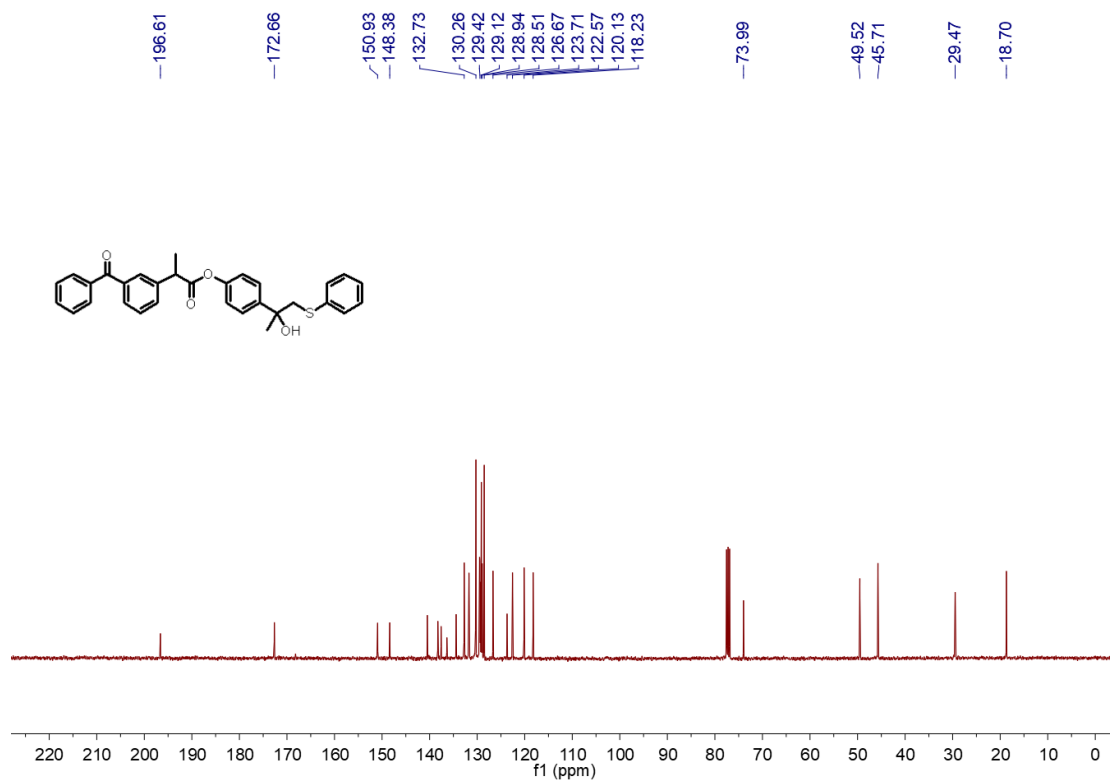

### <sup>1</sup>H NMR spectrum of c70

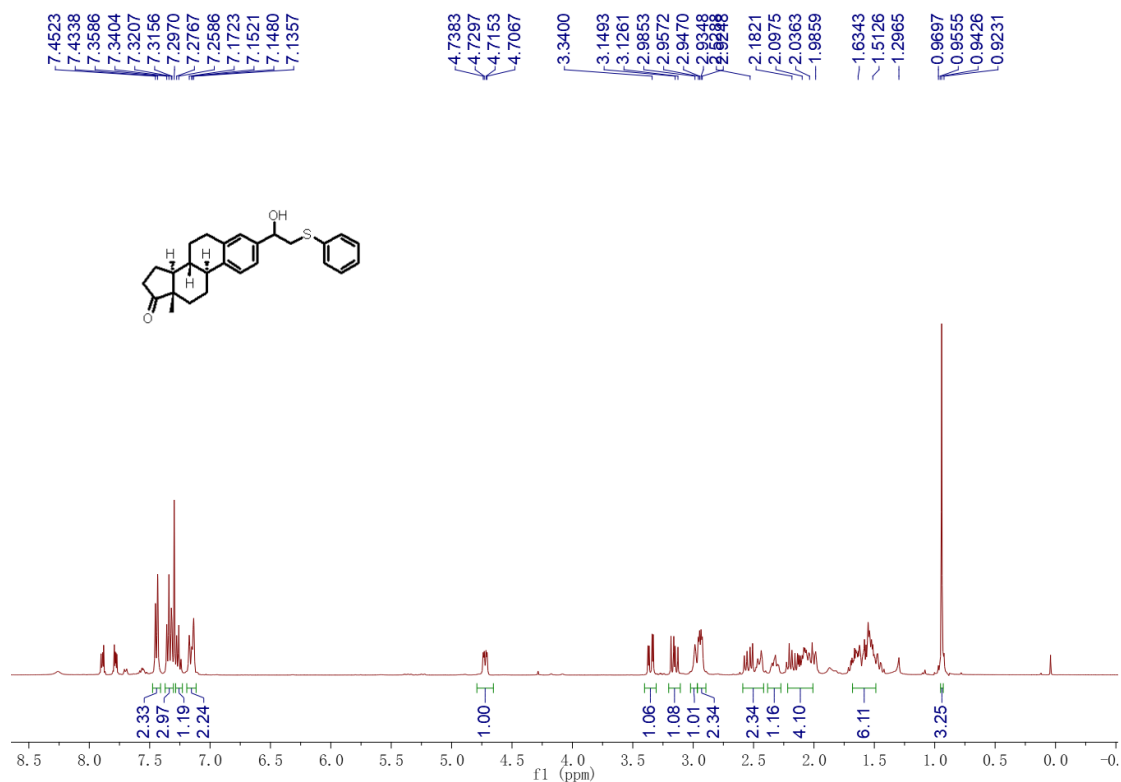



# <sup>13</sup>C NMR spectrum of c70

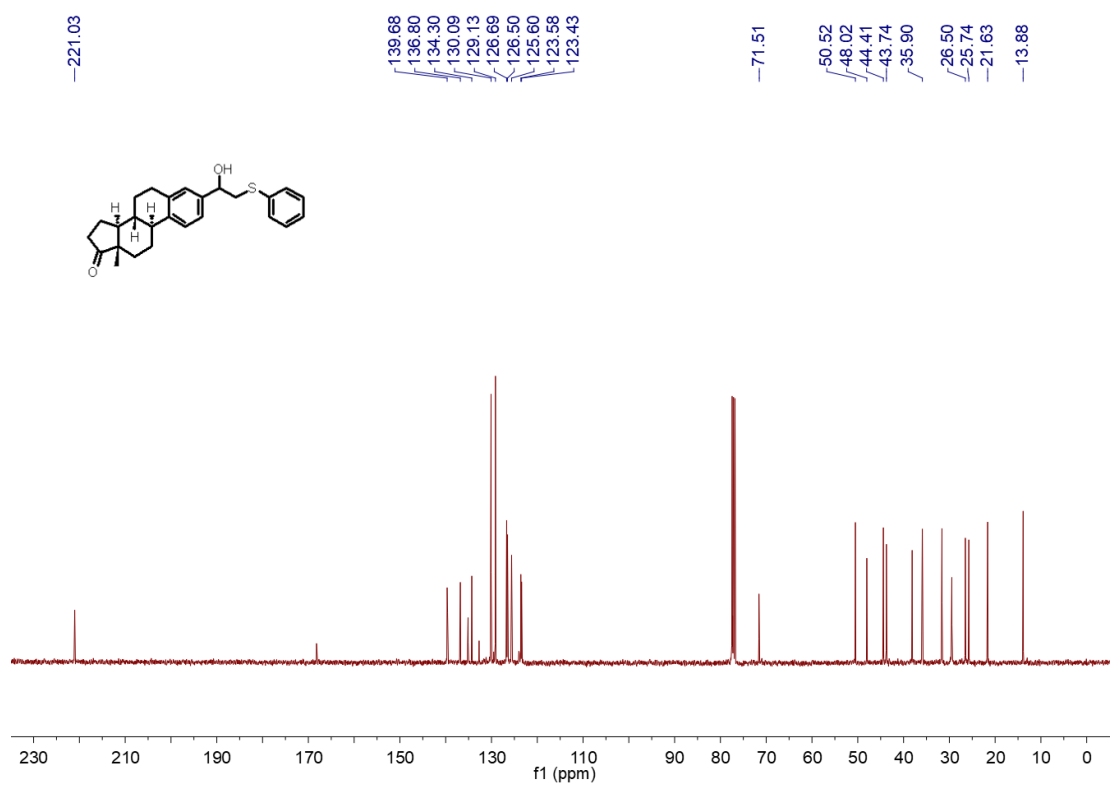

Supplement: d2qo00957a1.pdf [file d2qo00957a1.pdf]
